# Supplementary material for: Nonlinear temperature effects on multifractal complexity of metabolic rate of mice
Source: PeerJ. 2016 Oct 20;4:e2607. doi: 10.7717/peerj.2607 (PMC5075692; doi:10.7717/peerj.2607)
Supplement: Data S1 — The data shows individual time series for 18 mice assigned at random to seven different temperature treatments. Given that experimental records differed in total length, data in the matrix have been padded with “nan” codes. For every time series, we provide the original experimental code, individual body mass measured after metabolic rate recording, and environmental temperature at which the metabolic rate signal was registered. [file peerj-04-2607-s001.xls]

## Sheet: Suppdata Labra et al.
Nonlinear temperature effects on multifractal complexity of metabolic rate
Fabio A. Labra1,2, José M. Bogdanovich2,3,** and Francisco Bozinovic3*.
1Facultad de Ciencias, Universidad Santo Tomas, Ejercito 146, Código Postal 8370003, Santiago, Chile.
2Centro de Investigación e Innovación para el Cambio Climático (CIICC), Universidad Santo Tomás, Ejercito 146, Código Postal 8370003, Santiago, Chile..
3Departamento de Ecología, Center of Applied Ecology & Sustainability (CAPES) and LINC-Global, Facultad de Ciencias Biológicas, Pontificia Universidad Católica de Chile, Código Postal 6513677, Chile.
*Corresponding Author;
Fabio A. Labra1,2
Ejército 146, Código Postal 8370003, Santiago, Chile
Email address: flabra@santotomas.cl
The data shows individual time series for 18 mice assigned at random to seven different temperature treatments.
Given that experimental records differed in total length, data in the matrix have been padded with "nan" codes.
Code	s2g2m12	s2g2m22	s2g1m31	s2g2m32	s2g1m41	s2g2m42	s2g1m51	s2g2m52	s2g1m61	s2g2m62	s2g1m11	s2g2m12	s2g1m21	s2g2m22	s2g1m31	s2g1m41	s2g2m42	s2g1m51	s2g1m61	s2g2m62	s2g1m11	s2g2m12	s2g1m21	s2g2m22	s2g1m31	s2g1m41	s2g2m42	s2g1m51	s2g1m61	s2g2m62	s2g1m11	s2g1m11	s2g1m21	s2g1m21	s2g1m31	s2g1m41	s2g1m41	s2g1m51	s2g1m61	s2g1m61	s2g1m11	s2g2m12	s2g1m21	s2g1m31	s2g2m32	s2g1m41	s2g2m42	s2g1m51	s2g1m61
Series ID	2	4	5	6	7	8	9	10	11	12	13	14	15	16	17	19	20	21	23	24	26	27	29	30	32	35	36	38	41	42	43	44	45	46	47	49	50	51	53	54	56	57	59	62	63	65	66	68	71
Body mass (g)	32.6	32.2	35	36.5	39.1	31	35	30.3	38.1	33.6	31.7	32.9	38.4	32.4	34.9	38.4	31.6	32.8	37.2	34.8	31.7	32.9	38.4	32.4	34.9	38.4	31.6	32.8	37.2	34.8	32	32	37.6	37.6	34.5	37.8	37.8	34.2	37.6	37.6	32.5	32.9	38.6	33.2	36.3	37.2	31.6	34.2	32.9
Ambient Temperature	0	0	0	0	0	0	0	0	0	0	5	5	5	5	5	5	5	5	5	5	10	10	10	10	10	10	10	10	10	10	15	15	15	15	15	15	15	15	15	15	20	20	20	20	20	20	20	20	20
Time (s)
1	297.747	253.256	293.05	366.509	238.169	199.756	195.948	306.661	378.379	296.46	260.619	248.725	290.927	192.699	251.565	286.188	257.693	273.977	274.361	285.562	252.653	228.154	242.847	192.928	272.636	269.04	225.05	245.524	318.428	298.844	220.692	216.145	239.444	177.571	244.506	260.682	244.596	278.124	282.857	190.012	205.917	217.356	235.032	356.261	240.665	104.637	210.778	254.665	249.547
2	298.286	254.325	294.065	361.173	239.737	200.285	194.392	308.04	371.468	296.351	261.152	249.886	292.98	192.976	248.377	287.766	257.635	275.325	274.26	284.838	253.719	228.364	246.5	192.283	273.717	270.082	226.374	245.153	316.086	299.649	220.578	216.581	239.19	173.964	239.968	262.284	246.421	278.8	283.308	188.092	206.287	220.381	234.37	353.544	240.555	103.898	209.529	249.484	245.368
3	298.291	255.395	294.014	355.73	241.304	200.278	192.986	309.369	363.276	294.642	259.015	250.727	297.168	193.69	246.254	287.742	257.364	276.259	274.8	284.611	251.582	228.652	247.486	191.93	273.731	272.728	227.905	245.256	313.743	300.312	220.341	215.949	239.497	170.563	235.598	264.014	248.122	279.688	283.915	186.375	206.519	223.344	233.789	351.197	240.481	103.447	208.351	244.334	241.315
4	298.295	257	297.699	349.754	242.551	201.873	191.601	310.641	354.658	292.4	257.413	251.19	300.288	194.647	245.2	293.589	256.899	276.777	274.272	284.669	249.979	229.027	246.338	191.673	276.949	272.171	229.637	245.775	311.721	300.691	220.35	217.987	240.057	167.414	231.429	265.852	249.605	280.684	284.303	184.842	206.843	226.251	233.229	348.357	240.451	103.036	207.242	239.468	237.355
5	300.434	254.867	297.113	344.418	244.651	201.333	190.215	311.831	346.253	290.69	257.944	251.351	302.875	195.652	243.08	295.702	256.245	276.939	275.239	284.763	254.248	229.441	247.857	191.465	278.563	270.548	231.526	246.412	309.486	300.892	220.729	219.489	241.066	164.543	227.5	267.788	250.793	281.857	284.721	183.365	207.051	229.118	232.678	345.188	240.477	102.708	206.21	234.946	233.647
6	298.838	255.937	297.061	338.441	246.645	200.792	189.108	312.936	338.703	291.651	256.342	251.251	305.995	196.56	237.224	293.009	255.49	276.746	276.74	285.319	256.914	229.855	248.841	191.257	278.577	270.524	233.566	246.752	306.824	300.772	221.354	217.259	242.047	161.988	223.833	269.824	251.657	282.924	285.297	181.85	207.445	232.003	232.119	341.732	240.598	102.42	205.263	230.518	230.19
7	298.308	256.472	294.341	332.465	248.959	202.922	188.406	313.916	330.938	286.738	254.739	250.781	310.183	197.468	234.035	292.985	254.654	276.553	278.027	285.983	259.046	230.22	253.562	191.001	280.192	270.5	235.712	247.567	304.909	300.474	222.143	219.295	243.029	159.765	220.459	271.946	252.225	284.026	285.81	180.373	207.514	234.859	231.55	337.989	240.826	102.133	204.381	226.593	226.952
8	299.915	256.475	295.89	326.061	250.953	203.449	188.302	314.762	324.134	285.028	253.136	250.05	312.237	198.327	225.509	297.766	253.78	275.945	278.78	286.61	256.91	230.566	257.217	191.375	277.536	273.68	237.965	248.856	302.353	299.821	223.137	218.132	244.291	157.867	217.401	274.122	252.571	284.95	286.072	179.079	207.374	237.766	230.999	334.286	241.104	102.01	203.552	223.013	224.091
9	300.986	260.214	293.703	320.405	253.374	201.842	188.86	315.459	318.291	285.989	250.464	249.125	313.222	199.575	221.255	291.871	252.838	275.396	280.601	287.486	259.577	231.048	259.271	191.361	280.219	276.858	240.237	250.56	300.651	299.203	223.804	221.77	245.806	156.3	214.683	276.313	252.806	285.875	286.366	178.006	207.095	240.662	230.529	330.256	241.461	101.928	202.781	219.81	221.231
10	302.06	260.748	293.117	314.215	255.261	202.369	190.058	316.013	312.448	288.014	249.93	248.025	318.477	200.968	221.268	296.652	251.832	274.61	281.781	288.541	258.507	231.762	260.256	191.493	280.232	276.303	242.515	252.383	298.309	298.443	224.798	220.603	247.18	155.056	212.322	278.501	253.054	286.799	286.722	177.081	206.56	243.518	230.098	326.266	241.873	101.928	202.121	216.889	218.872
11	302.595	260.218	296.27	309.306	257.255	202.897	191.726	316.376	307.459	285.238	252.061	246.683	315.194	202.312	218.08	298.764	250.751	273.705	282.641	289.631	260.639	232.71	261.775	191.77	282.915	275.211	244.737	253.85	296.501	297.398	225.916	219.973	248.527	154.115	210.341	280.669	253.423	287.759	287.078	176.173	205.98	246.262	229.675	322.153	242.253	101.928	201.601	214.346	216.577
12	304.736	262.354	294.083	305.037	258.394	205.026	193.543	316.577	304.391	281.395	248.325	245.204	318.314	203.657	216.49	300.342	249.589	272.741	283.501	290.828	260.636	233.929	264.362	191.611	277.591	276.256	246.889	255.377	294.159	296.424	227.156	220.944	249.845	153.462	208.755	282.814	253.993	288.719	287.466	175.413	205.399	248.889	229.231	318.287	242.589	102.297	201.192	212.116	214.501
13	307.942	259.688	291.361	300.662	259.641	205.02	195.381	316.596	301.11	279.685	245.655	243.561	319.299	205.05	211.702	300.852	248.326	271.481	285.214	291.811	262.236	235.371	265.882	191.403	276.004	277.834	248.916	257.259	292.03	295.415	228.52	222.447	251.304	153.097	207.588	284.938	254.816	289.892	287.822	174.746	204.679	251.335	228.718	314.707	242.878	102.831	200.906	210.043	212.77
14	309.014	257.557	292.378	295.966	260.248	203.413	197.134	316.472	298.683	278.512	242.45	241.792	319.217	206.152	209.048	301.361	247.038	270.042	287.142	292.83	262.233	236.892	267.935	191.243	275.483	279.411	250.837	259.2	288.728	294.086	229.802	222.884	252.622	153	206.852	287.043	255.924	291.03	287.864	174.225	203.889	253.63	228.124	311.211	243.125	103.364	200.702	208.19	211.511
15	309.019	259.693	290.191	291.377	260.32	201.271	198.758	316.181	297.856	279.47	240.848	240.003	321.272	206.866	210.663	303.474	245.749	268.841	289.39	293.884	262.766	238.499	272.123	191.278	273.363	279.922	252.569	261.735	285.745	292.614	231.207	223.852	253.688	153.165	206.567	289.098	257.328	291.918	288.251	173.778	202.96	255.733	227.531	307.796	243.337	103.734	200.554	206.776	210.722
16	310.091	260.763	285.336	286.788	260.82	200.2	200.426	315.797	298.844	278.296	240.846	238.272	323.857	207.483	205.874	305.052	244.48	267.224	291.744	295.01	261.162	240.232	278.445	191.507	270.175	283.634	254.112	264.21	282.549	291.142	232.777	226.957	254.865	153.588	206.743	291.074	259.033	292.736	288.67	173.404	202.008	257.623	226.963	304.381	243.538	104.103	200.461	205.425	209.996
17	312.231	260.765	284.75	282.947	262.281	197.523	202.243	315.297	300.152	277.12	240.31	236.629	325.91	208.1	205.353	306.097	243.248	265.608	294.738	296.064	260.095	242.024	281.566	191.881	268.054	283.077	255.392	266.329	279.46	289.635	234.182	228.46	255.762	154.269	207.388	292.938	261.044	293.625	288.744	173.16	201.196	259.216	226.476	301.212	243.736	104.719	200.442	204.357	209.427
18	312.768	262.902	282.564	279.425	263.848	198.586	204.146	314.695	302.315	280.746	236.038	235.083	326.364	208.426	209.104	305.539	242.105	263.339	297.306	296.905	261.693	243.845	287.889	192.158	268.068	284.121	256.383	268.212	277.118	288.447	235.669	228.897	256.603	155.178	208.5	294.676	263.356	294.3	289.132	172.859	200.406	260.466	226.07	298.043	243.998	105.458	200.473	203.414	209.141
19	314.375	262.905	280.378	276.331	266.162	196.977	206.262	313.976	304.797	282.24	234.968	233.547	327.348	208.461	205.914	304.447	241.042	261.07	299.767	297.568	259.557	245.675	288.873	192.096	261.677	285.165	257.073	270.331	276.27	287.438	237.115	228.8	257.107	156.286	210.081	296.252	265.935	295.046	289.488	172.468	199.57	261.35	225.736	295.45	244.331	106.156	200.59	202.879	209.011
20	315.981	263.973	278.725	273.557	269.116	194.304	208.506	313.165	307.066	286.935	234.433	231.933	328.867	208.689	203.259	304.425	240.087	258.505	302.442	297.982	260.622	247.331	290.927	192.47	257.955	284.076	257.518	272.391	275.209	286.429	238.561	231.904	257.892	157.572	212.111	297.636	268.729	295.615	290.064	172.389	198.711	261.875	225.382	293.266	244.745	107.059	200.774	202.47	209.039
21	318.654	263.444	278.673	271.529	271.431	192.696	210.75	312.206	308.908	286.826	233.363	230.26	327.719	209.112	205.407	304.936	239.245	256.118	305.864	298.289	260.619	248.725	292.98	192.699	251.565	286.188	257.693	273.977	274.361	285.562	239.966	233.407	258.508	158.999	214.57	298.791	271.658	296.184	290.922	172.31	197.921	261.956	225.027	291.165	245.216	108.331	201.026	202.092	209.349
22	318.658	262.913	276.486	269.395	272.89	191.089	213.25	311.176	310.75	287.253	232.829	228.578	330.305	209.341	209.159	306.514	238.515	253.612	308.539	298.312	261.152	249.886	297.168	192.976	248.377	287.766	257.635	275.325	274.26	284.838	241.289	235.979	258.731	160.527	217.423	299.69	274.598	296.61	291.938	172.341	197.34	261.673	224.638	289.392	245.712	109.563	201.375	201.84	209.627
23	318.663	262.914	276.434	267.795	273.604	186.813	215.964	310.106	313.447	291.948	231.226	226.896	328.089	209.472	211.839	306.49	237.843	251.225	311	298.477	259.015	250.727	300.288	193.69	246.254	287.742	257.364	276.259	274.8	284.611	242.406	236.413	259.01	162.139	220.648	300.29	277.425	297	292.827	172.556	196.597	261.024	224.241	288.029	246.206	110.589	201.811	201.87	209.938
24	318.667	262.383	275.849	267.155	273.356	183.604	218.827	309.049	315.822	296.11	231.756	225.272	329.609	209.362	216.124	308.602	237.239	248.719	313.141	298.286	257.413	251.19	302.875	194.647	245.2	293.589	256.899	276.777	274.272	284.669	243.236	236.315	259.373	163.838	224.194	300.569	280.029	297	293.749	172.938	195.923	259.987	223.801	286.831	246.663	111.411	202.293	201.963	210.561
25	320.807	262.92	272.062	267.369	272.361	182.532	222.096	308.001	318.091	300.805	231.222	223.852	330.06	209.445	219.873	310.714	236.673	246.45	315.388	297.952	257.944	251.351	305.995	195.652	243.08	295.702	256.245	276.939	275.239	284.763	243.902	238.353	259.933	165.6	228.029	300.508	282.316	296.714	294.638	173.245	195.111	258.546	223.348	285.633	247.061	112.067	202.816	202.182	211.06
26	319.744	261.854	274.68	268.117	270.726	180.925	225.685	307.009	320.36	301.231	232.288	222.597	329.978	209.334	224.156	309.091	236.195	244.3	316.675	297.548	256.342	251.251	310.183	196.56	237.224	293.009	255.49	276.746	276.74	285.319	244.568	236.121	260.521	167.427	232.107	300.092	284.219	296.429	295.528	173.644	194.321	256.756	222.861	284.476	247.428	112.683	203.374	202.495	211.778
27	321.882	262.924	273.027	268.971	268.985	179.852	229.252	306.054	322.629	302.724	231.751	221.448	328.829	209.175	229.508	306.398	235.842	242.565	317.748	297.179	254.739	250.781	312.237	197.468	234.035	292.985	254.654	276.553	278.027	285.983	245.152	236.558	260.941	169.331	236.386	299.272	285.728	296.144	296.261	174.081	193.694	254.562	222.314	283.442	247.751	113.586	203.922	202.996	212.119
28	320.287	261.325	270.305	271.107	267.136	179.311	232.82	305.141	324.685	303.15	230.683	220.31	325.547	209.015	232.188	305.307	235.583	240.948	318.928	296.597	253.136	250.05	313.222	198.327	225.509	297.766	253.78	275.945	278.78	286.61	245.407	236.994	261.304	171.31	240.816	298.033	286.843	295.502	297.057	174.591	193.02	252.003	221.691	282.655	248.02	114.49	204.467	203.34	212.241
29	321.357	261.862	267.052	274.097	265.287	180.373	236.409	304.274	326.527	303.575	231.747	219.297	323.863	208.905	235.939	304.751	235.469	239.273	320.322	295.837	250.464	249.125	318.477	199.575	221.255	291.871	252.838	275.396	280.601	287.486	245.786	238.498	261.724	173.353	245.345	296.375	287.577	294.719	297.79	175.045	192.346	249.102	221.046	282.113	248.214	115.352	205.026	203.653	212.551
30	322.431	263.466	265.933	277.3	263.011	183.035	239.806	303.454	328.476	306.669	230.679	218.323	323.781	209.036	242.356	310.598	235.512	237.538	320.968	295.076	249.93	248.025	315.194	200.968	221.268	296.652	251.832	274.61	281.781	288.541	245.877	237.866	261.919	175.48	249.921	294.323	287.962	293.971	298.46	175.5	191.858	245.913	220.418	281.695	248.364	116.091	205.613	204.154	212.547
31	322.435	260.265	265.881	280.823	260.735	183.029	243.075	302.722	330.318	307.095	230.676	217.456	319.965	208.634	249.308	311.108	235.656	235.744	321.829	294.103	252.061	246.683	318.314	202.312	218.08	298.764	250.751	273.705	282.641	289.631	245.558	238.835	262.282	177.688	254.488	291.911	288.037	293.33	299.381	175.973	191.602	242.495	219.803	281.565	248.52	116.789	206.23	204.655	212.481
32	324.575	261.869	262.093	285.093	258.033	184.091	246.429	302.055	332.053	306.987	231.742	216.686	318.282	208.087	257.328	313.22	235.906	234.246	322.475	293.094	248.325	245.204	319.299	203.657	216.49	300.342	249.589	272.741	283.501	290.828	244.787	237.138	262.533	179.974	258.985	289.216	287.829	292.582	299.769	176.464	191.323	238.924	219.264	281.721	248.675	117.404	206.898	205	212.477
33	324.046	258.67	262.575	289.15	255.117	185.685	249.868	301.448	332.934	306.879	232.274	216.207	318.2	208.073	262.678	312.129	236.294	232.926	322.695	292.084	245.655	243.561	319.217	205.05	211.702	300.852	248.326	271.481	285.214	291.811	243.729	236.507	262.756	182.366	263.359	286.31	287.383	291.585	300.219	177.103	191.322	235.253	218.752	282.083	248.813	117.938	207.59	205.532	212.41
34	321.914	257.604	261.989	293.1	251.56	185.145	253.415	300.897	334.029	303.035	232.807	215.932	318.119	208.205	270.163	312.107	236.783	231.724	322.915	290.862	242.45	241.792	321.272	206.152	209.048	301.361	247.038	270.042	287.142	292.83	242.383	240.145	263.091	184.887	267.552	283.265	286.752	290.339	300.889	177.889	191.368	231.576	218.218	283.061	248.984	118.472	208.263	206.096	212.28
35	319.252	258.141	264.607	297.905	248.324	187.807	257.004	300.447	335.017	306.663	232.27	215.851	318.037	208.482	273.913	313.151	237.328	230.405	322.601	289.888	240.848	240.003	323.857	206.866	210.663	303.474	245.749	268.841	289.39	293.884	241.078	241.648	263.174	187.534	271.505	280.152	285.979	288.95	301.214	178.786	191.368	227.972	217.65	284.285	249.195	119.046	208.929	206.692	211.931
36	319.256	257.075	264.557	302.815	244.768	189.403	260.721	300.073	335.578	302.82	231.734	215.906	318.489	208.565	281.398	310.459	237.936	229.025	322.18	288.736	240.846	238.272	325.91	207.483	205.874	305.052	244.48	267.224	291.744	295.01	239.733	237.281	263.2	190.321	275.162	277.074	285.094	287.455	301.319	179.719	191.506	224.503	217.09	285.386	249.35	119.867	209.561	207.224	211.237
37	318.728	257.611	262.903	307.833	241.212	193.666	264.31	299.8	335.819	297.907	231.199	216.097	316.807	209.182	283.013	310.968	238.532	227.646	321.653	287.87	240.31	236.629	326.364	208.1	205.353	306.097	243.248	265.608	294.738	296.064	238.346	238.25	263.114	193.26	278.477	274.12	284.114	285.925	301.047	180.652	191.761	221.23	216.479	287.103	249.472	120.647	210.154	207.851	210.322
38	317.664	259.214	262.317	313.17	237.762	196.861	267.6	299.643	336.594	296.732	233.865	216.326	317.258	209.75	286.23	309.878	239.197	226.326	320.911	286.825	236.038	235.083	327.348	208.426	209.104	305.539	242.105	263.339	297.306	296.905	236.96	239.221	262.831	196.344	281.39	271.394	283.026	284.501	300.681	181.677	192.131	218.205	215.839	289.312	249.565	121.304	210.728	208.603	209.471
39	317.136	256.548	263.333	317.76	234.313	198.99	270.314	299.566	336.514	297.158	234.929	216.653	317.175	210.561	293.179	312.524	239.886	224.888	319.423	286.171	234.968	233.547	328.867	208.461	205.914	304.447	241.042	261.07	299.767	297.568	235.286	235.388	262.211	199.559	283.867	268.963	281.789	283.219	299.844	182.702	192.571	215.472	215.189	292.014	249.603	122.043	211.314	209.23	208.399
40	315.54	257.085	265.416	321.604	231.29	201.119	272.323	299.618	336.755	297.583	236.53	217.193	320.295	211.566	294.795	311.433	240.72	223.508	318.042	285.305	234.433	231.933	327.719	208.689	203.259	304.425	240.087	258.505	302.442	297.982	233.53	235.29	261.535	202.901	285.862	266.869	280.365	281.795	298.819	183.838	193.035	213.115	214.51	295.003	249.561	122.494	211.899	209.92	207.234
41	315.545	258.155	262.696	325.767	228.801	202.714	273.351	299.8	335.502	294.808	237.596	218.014	321.815	212.328	298.544	313.011	241.693	222.07	315.593	284.438	233.363	230.26	330.305	209.112	205.407	304.936	239.245	256.118	305.864	298.289	231.938	233.592	260.691	206.369	287.348	265.12	278.748	280.158	297.575	185.065	193.684	211.129	213.763	298.28	249.452	123.069	212.452	210.735	205.849
42	314.481	255.487	261.042	328.757	226.739	208.046	273.545	300.112	334.783	293.631	239.729	219.078	322.267	213.285	299.626	314.056	242.866	220.276	313.464	283.464	232.829	228.578	328.089	209.341	209.159	306.514	238.515	253.612	308.539	298.312	229.73	232.96	259.453	209.949	288.297	263.721	276.951	278.2	296.236	186.311	194.449	209.485	212.96	301.967	249.264	123.644	212.981	211.487	204.495
43	313.417	253.356	260.99	331.106	224.57	208.04	273.036	300.591	332.889	291.388	239.194	220.472	322.185	214.241	303.909	317.767	244.158	218.244	311.122	282.775	231.226	226.896	329.609	209.472	211.839	306.49	237.843	251.225	311	298.477	227.728	229.66	258.019	213.611	288.7	262.643	275.032	276.314	294.739	187.668	195.678	208.224	212.166	306.188	249.043	124.465	213.51	212.114	203.047
44	311.822	250.688	260.406	333.562	223.255	211.769	272.056	301.274	330.996	288.079	240.792	222.021	319.437	214.906	307.659	319.88	245.595	216.331	308.994	282.086	231.756	225.272	330.06	209.362	216.124	308.602	237.239	248.719	313.141	298.286	225.684	228.497	256.247	217.333	288.546	261.87	273.08	274.499	293.024	188.969	196.884	207.322	211.354	310.573	248.798	125.163	214.008	212.521	201.756
45	315.028	251.225	260.355	335.056	221.406	212.831	270.735	302.074	328.141	287.437	243.992	223.687	321.488	215.814	309.807	322.524	247.145	214.181	306.331	281.219	231.222	223.852	329.978	209.445	219.873	310.714	236.673	246.45	315.388	297.952	223.846	228.93	254.335	221.079	287.841	261.377	271.158	272.719	291.057	190.307	197.997	206.763	210.585	315.205	248.502	125.902	214.463	213.117	200.465
46	313.432	250.693	258.167	334.95	220.411	218.161	269.265	302.994	325.713	287.33	240.254	225.449	324.61	216.625	312.489	318.766	248.764	212.327	304.202	280.602	232.288	222.597	328.829	209.334	224.156	309.091	236.195	244.3	316.675	297.548	222.008	226.167	252.171	224.787	286.596	261.135	269.287	270.761	288.933	191.7	199.064	206.574	209.851	320.288	248.226	126.682	214.904	213.649	198.923
47	315.572	250.163	259.717	335.271	220.27	214.952	267.623	304.006	322.432	282.417	240.787	227.309	325.595	217.97	311.437	312.872	250.433	210.118	301.22	280.055	231.751	221.448	325.547	209.175	229.508	306.398	235.842	242.565	317.748	297.179	220.334	227.136	249.866	228.394	284.834	261.079	267.452	268.733	286.746	193.057	200.154	206.852	209.167	325.125	247.97	127.134	215.332	214.119	197.475
48	315.043	246.429	258.599	335.806	220.556	215.478	265.833	305.154	319.258	279.107	241.85	229.139	328.181	219.023	313.05	312.849	252.202	207.849	298.024	279.686	230.683	220.31	323.863	209.015	232.188	305.307	235.583	240.948	318.928	296.597	218.865	225.437	247.392	231.849	282.594	261.161	265.594	266.811	284.277	194.303	201.104	207.602	208.497	329.92	247.716	127.75	215.693	214.683	196.152
49	317.715	246.965	256.412	335.274	220.842	217.076	263.893	306.385	316.403	273.663	242.917	231.057	330.769	220.32	307.728	313.895	254.041	205.462	294.507	279.353	231.747	219.297	323.781	208.905	235.939	304.751	235.469	239.273	320.322	295.837	217.397	225.874	244.974	235.098	279.917	261.343	263.638	264.889	281.933	195.438	202.125	208.801	207.869	334.839	247.474	128.078	216.072	215.341	194.673
50	320.389	248.035	256.894	334.314	221.769	216.002	261.974	307.699	314.296	276.756	243.982	232.956	330.688	221.664	306.141	311.736	255.955	202.896	291.739	279.02	230.679	218.323	319.965	209.036	242.356	310.598	235.512	237.538	320.968	295.076	216.38	224.175	242.304	238.088	276.85	261.599	261.528	262.824	279.464	196.482	203.006	210.371	207.232	339.593	247.252	128.407	216.464	215.937	193.256
51	321.993	244.837	254.708	332.927	222.055	216.529	260.14	309.102	312.722	277.716	246.116	234.583	332.742	223.155	306.155	312.245	257.957	200.628	288.435	278.722	230.676	217.456	318.282	208.634	249.308	311.108	235.656	235.744	321.829	294.103	215.116	219.274	239.606	240.774	273.447	261.896	259.236	260.938	276.932	197.507	203.956	212.272	206.592	343.897	246.97	128.941	216.856	216.375	191.84
52	325.2	248.574	251.987	331.434	221.915	217.058	258.371	310.523	311.255	276.541	248.781	235.938	332.125	225.469	301.897	312.756	260.072	198.715	285.666	278.14	231.742	216.686	318.2	208.087	257.328	313.22	235.906	234.246	322.475	293.094	214.141	220.244	236.992	243.113	269.763	262.232	256.752	259.229	274.557	198.551	204.861	214.376	205.976	347.953	246.641	129.31	217.241	216.877	190.674
53	328.408	243.773	251.402	329.087	222.841	220.253	256.688	311.93	310.429	273.23	249.848	237.099	328.841	228.075	302.446	311.665	262.237	196.624	282.684	277.593	232.274	216.207	318.119	208.073	262.678	312.129	236.294	232.926	322.695	292.084	213.082	219.08	234.406	245.058	265.844	262.577	254.056	257.414	272.182	199.484	205.719	216.592	205.4	351.723	246.312	129.598	217.622	217.504	189.76
54	330.546	245.91	251.35	327.06	223.66	218.647	254.876	313.296	310.029	271.521	249.846	237.92	328.76	230.876	300.323	305.772	264.484	194.711	279.381	277.082	232.807	215.932	318.037	208.205	270.163	312.107	236.783	231.724	322.915	290.862	211.86	215.78	231.848	246.566	261.746	262.9	251.117	255.705	269.555	200.362	206.321	218.836	204.849	355.287	245.968	129.967	218.022	218.036	189.065
55	330.551	248.047	248.629	324.178	224.373	215.436	252.893	314.605	309.203	269.279	248.243	238.373	327.077	234.161	297.671	303.08	266.731	192.383	276.292	277.034	232.27	215.851	318.489	208.482	273.913	313.151	237.328	230.405	322.601	289.888	211.13	214.082	229.543	247.602	257.522	263.155	247.872	254.459	266.74	201.276	207.017	221.069	204.319	358.194	245.677	130.419	218.46	218.694	188.371
56	334.826	252.318	246.444	321.51	226.261	212.763	250.548	315.799	309.444	272.906	254.112	238.515	328.062	237.592	293.414	301.456	269.034	190.352	273.63	277.021	231.734	215.906	316.807	208.565	281.398	310.459	237.936	229.025	322.18	288.736	210.647	213.45	227.181	248.148	253.224	263.31	244.24	253.356	264.271	202.154	207.48	223.234	203.836	361.019	245.446	130.624	218.92	219.164	187.99
57	334.297	253.921	246.924	318.309	227.934	209.554	247.967	316.9	310.111	268.529	252.508	238.279	329.048	241.702	292.361	299.832	271.293	188.735	270.327	277.185	231.199	216.097	317.258	209.182	283.013	310.968	238.532	227.646	321.653	287.87	210.451	212.284	225.045	248.184	248.9	263.336	240.155	252.466	262.085	202.959	207.758	225.304	203.337	363.392	245.248	131.075	219.383	219.446	187.578
58	337.503	258.195	242.603	314.36	229.501	210.083	245.088	317.811	311.313	264.684	252.507	237.577	328.966	245.569	289.707	300.875	273.503	187.475	267.451	277.493	233.865	216.326	317.175	209.75	286.23	309.878	239.197	226.326	320.911	286.825	210.46	210.052	223.273	247.707	244.602	263.209	235.621	251.718	260.275	203.929	207.943	227.178	202.837	364.986	245.053	131.527	219.891	219.821	187.48
59	336.974	259.263	238.816	310.625	231.495	207.409	242.209	318.545	313.156	263.51	254.106	236.477	329.418	249.679	283.315	294.45	275.605	186.57	265.109	278.085	234.929	216.653	320.295	210.561	293.179	312.524	239.886	224.888	319.423	286.171	210.551	212.09	221.446	246.718	240.377	262.899	230.686	251.005	258.496	204.788	208.058	228.821	202.397	365.799	244.899	131.773	220.441	220.197	187.539
60	336.978	262.467	236.629	306.997	234.129	205.8	239.223	319.071	315.318	263.402	254.639	235.028	329.871	253.79	280.661	290.155	277.575	186.021	262.34	279.032	236.53	217.193	321.815	211.566	294.795	311.433	240.72	223.508	318.042	285.305	210.56	213.061	219.731	245.226	236.266	262.382	225.484	250.329	256.843	205.666	208.057	230.194	202.029	366.12	244.753	132.101	221.032	220.478	188.006
61	335.915	265.139	233.376	302.728	236.337	205.261	236.493	319.406	318.014	263.827	254.636	233.385	327.12	257.608	276.938	286.929	279.351	185.768	259.571	280.051	237.596	218.014	322.267	212.328	298.544	313.011	241.693	222.07	315.593	284.438	210.364	212.963	218.493	243.244	232.305	261.634	220.202	249.794	255.378	206.507	208.08	231.326	201.709	365.949	244.644	132.348	221.707	220.791	188.63
62	334.854	272.081	231.19	297.819	238.545	200.45	233.742	319.532	320.603	262.117	255.701	231.732	327.037	261.427	275.351	282.637	280.945	185.931	257.656	281.212	239.729	219.078	322.185	213.285	299.626	314.056	242.866	220.276	313.464	283.464	210.415	208.594	217.311	240.806	228.533	260.647	215.018	249.473	254.039	207.146	208.01	232.171	201.457	365.284	244.568	132.758	222.489	220.853	189.662
63	332.723	280.087	225.802	293.55	240.645	198.844	231.097	319.431	323.726	264.145	255.164	230.079	328.025	265.004	272.696	280.48	282.319	186.568	255.847	282.267	239.194	220.472	319.437	214.241	303.909	317.767	244.158	218.244	311.122	282.775	210.342	208.497	216.186	237.95	224.987	259.426	210.063	249.401	252.951	207.674	207.73	232.763	201.269	364.415	244.481	133.251	223.357	221.103	190.819
64	329.527	281.691	222.548	288.321	242.319	198.305	228.452	319.112	326.956	261.901	254.097	228.445	329.01	268.192	269.509	274.587	283.448	187.857	254.466	283.534	240.792	222.021	321.488	214.906	307.659	319.88	245.595	216.331	308.994	282.086	210.556	210	215.313	234.714	221.689	257.994	205.437	249.152	251.707	208.184	207.266	233.07	201.123	362.765	244.39	133.374	224.305	221.416	192.417
65	327.395	283.293	218.761	283.945	244.313	198.832	225.871	318.603	329.972	261.261	254.094	226.831	327.327	271.186	267.922	270.828	284.345	189.561	253.084	285.122	243.992	223.687	324.61	215.814	309.807	322.524	247.145	214.181	306.331	281.219	210.77	211.504	214.694	231.161	218.669	256.377	201.153	249.364	250.556	208.676	206.778	233.072	200.965	360.623	244.291	133.62	225.376	221.667	194.171
66	325.799	286.498	214.438	279.143	246.307	196.69	223.227	317.917	331.814	264.889	250.89	225.197	327.779	273.453	264.2	269.736	284.903	191.503	251.81	286.817	240.254	225.449	325.595	216.625	312.489	318.766	248.764	212.327	304.202	280.602	210.944	211.942	214.27	227.352	215.949	254.612	197.183	249.435	249.562	209.149	205.941	232.681	200.837	358.111	244.21	133.826	226.537	221.728	196.113
67	321.532	288.102	211.185	274.554	248.727	194.017	220.817	317.045	334.616	261.577	251.423	223.505	326.097	275.574	261.011	264.91	285.003	193.8	250.748	288.797	240.787	227.309	328.181	217.97	311.437	312.872	250.433	210.118	301.22	280.055	211.199	211.844	214.1	223.343	213.547	252.729	193.511	249.576	248.725	209.475	204.966	231.898	200.734	355.435	244.146	133.867	227.775	221.727	198.495
68	317.269	290.773	210.599	269.005	250.721	195.077	218.663	316.049	336.672	258.268	248.218	221.804	322.813	276.87	259.423	260.616	284.675	196.394	250.754	291.096	241.85	229.139	330.769	219.023	313.05	312.849	252.202	207.849	298.024	279.686	211.455	211.212	214.182	219.181	211.467	250.763	190.126	249.931	247.763	209.8	204.13	230.754	200.631	352.389	244.133	133.949	229.095	221.852	200.877
69	314.072	291.842	209.48	263.348	252.929	196.672	216.894	314.931	338.407	259.759	250.351	220.209	321.663	278.02	259.437	258.994	283.914	198.692	250.547	293.574	242.917	231.057	330.688	220.32	307.728	313.895	254.041	205.462	294.507	279.353	211.546	211.648	214.489	214.932	209.716	248.759	187.032	250.429	246.926	210.016	203.364	229.274	200.503	348.728	244.12	133.99	230.438	221.788	203.259
70	309.806	291.845	207.827	256.731	254.496	195.065	215.658	313.698	339.609	261.787	243.944	218.818	317.314	278.734	256.782	256.835	282.683	201.048	250.873	295.802	243.982	232.956	332.742	221.664	306.141	311.736	255.955	202.896	291.739	279.02	211.802	213.151	215.021	210.641	208.293	246.764	184.266	250.819	246.278	210.213	202.574	227.468	200.426	344.82	244.179	133.702	231.771	221.598	205.641
71	306.076	289.179	206.708	250.541	255.635	192.391	214.85	312.274	341.024	263.281	242.342	217.669	314.029	278.866	254.661	253.076	281.074	204.057	252.481	298.422	246.116	234.583	332.125	223.155	306.155	312.245	257.957	200.628	288.435	278.722	212.016	213.587	215.778	206.344	207.194	244.817	181.875	251.601	246.132	210.244	201.993	225.397	200.383	340.831	244.256	133.579	233.085	221.535	207.992
72	303.945	289.715	207.723	243.497	257.309	191.319	214.617	310.762	341.479	262.639	236.469	216.667	316.615	278.852	253.072	248.249	279.146	207.54	254.408	300.971	248.781	235.938	328.841	225.469	301.897	312.756	260.072	198.715	285.666	278.14	212.6	210.289	216.675	202.087	206.408	242.95	179.873	252.241	246.237	210.22	201.273	223.08	200.391	336.882	244.282	133.661	234.398	221.439	210.28
73	298.079	287.048	210.341	236.987	258.983	191.845	215.004	309.195	343.214	262.532	233.264	215.858	312.265	278.062	251.487	250.361	276.859	210.787	255.161	303.271	249.848	237.099	328.76	228.075	302.446	311.665	262.237	196.624	282.684	277.593	213.019	213.927	217.881	197.925	205.93	241.195	178.264	252.738	246.248	210.215	200.576	220.554	200.455	332.892	244.177	133.661	235.707	221.532	212.567
74	297.55	288.118	213.493	230.264	260.443	193.44	215.84	307.59	344.309	259.219	231.129	215.224	310.047	276.738	246.696	248.738	274.202	214.092	256.128	305.321	249.846	237.92	327.077	230.876	300.323	305.772	264.484	194.711	279.381	277.082	213.644	212.761	219.171	193.894	205.744	239.564	177.038	253.164	246.196	210.191	199.833	217.9	200.608	328.82	243.906	133.825	236.981	221.751	215.012
75	293.82	283.852	214.507	223.647	261.69	193.434	216.931	305.99	346.151	258.046	228.992	214.716	305.695	275.123	243.509	248.18	271.213	217.397	257.415	307.336	248.243	238.373	328.062	234.161	297.671	303.08	266.731	192.383	276.292	277.034	214.187	215.333	220.686	190.022	205.829	238.071	176.184	253.448	246.05	210.094	199.067	215.144	200.83	324.995	243.411	133.907	238.227	221.75	217.112
76	291.688	281.184	215.522	216.71	263.578	197.163	218.385	304.437	347.779	260.072	223.652	214.353	304.548	272.974	242.456	247.622	267.916	220.94	258.382	309.6	254.112	238.515	329.048	237.592	293.414	301.456	269.034	190.352	273.63	277.021	214.812	215.768	222.538	186.347	206.169	236.74	175.677	253.946	245.966	210.181	198.556	212.293	201.116	320.923	242.739	133.825	239.462	221.592	219.117
77	285.823	279.053	214.938	211.054	264.397	196.091	220.117	302.892	349.194	258.895	221.516	214.321	302.865	270.438	243.002	248.667	264.411	224.838	259.562	312.042	252.508	238.279	328.966	241.702	292.361	299.832	271.293	188.735	270.327	277.185	215.601	217.271	224.39	182.889	206.739	235.591	175.517	254.372	246.166	210.451	198.276	209.43	201.461	317.385	241.94	133.907	240.653	221.685	220.903
78	285.294	276.92	214.886	204.757	264.79	195.55	221.977	301.385	349.649	259.856	219.38	214.57	299.046	267.076	240.348	244.375	260.681	229.389	261.81	314.235	252.507	237.577	329.418	245.569	289.707	300.875	273.503	187.475	267.451	277.493	216.267	214.506	226.692	179.658	207.512	234.629	175.732	254.834	246.836	210.722	197.905	206.54	201.875	313.971	241.033	133.99	241.723	221.904	222.594
79	285.299	274.788	218.568	198.033	265.29	195.01	224.136	299.948	349.997	262.417	215.108	215.09	294.162	263.472	238.761	245.952	256.793	233.94	264.057	316.322	254.106	236.477	329.871	249.679	283.315	294.45	275.605	186.57	265.109	278.085	217.179	216.545	229.077	176.676	208.465	233.859	176.351	255.687	247.694	211.029	197.579	203.655	202.353	310.966	240.025	133.948	242.721	222.311	223.909
80	285.303	268.387	219.05	191.203	265.363	195.003	226.785	298.589	350.344	259.64	212.971	215.795	294.081	259.383	236.64	245.397	252.749	237.72	266.946	318.194	254.639	235.028	327.12	253.79	280.661	290.155	277.575	186.021	262.34	279.032	218.092	216.447	231.491	173.96	209.571	233.285	177.369	256.505	248.584	211.41	197.532	200.804	202.904	308.003	238.882	133.784	243.571	222.561	224.878
81	280.505	267.854	223.27	185.547	265.115	198.202	229.734	297.328	349.945	264.335	210.301	216.636	286.527	254.808	236.119	244.305	248.547	241.44	269.62	319.96	254.636	233.385	327.037	257.608	276.938	286.929	279.351	185.768	259.571	280.051	218.922	217.415	234.158	171.525	210.807	232.902	178.799	257.571	249.788	211.681	197.647	197.958	203.493	305.532	237.565	133.579	244.231	222.843	225.659
82	278.374	265.723	225.886	179.463	265.081	194.459	232.703	296.21	349.332	266.361	209.233	217.496	281.641	250.04	233.465	247.483	244.113	245.279	272.081	321.655	255.701	231.732	328.025	261.427	275.351	282.637	280.945	185.931	257.656	281.212	219.834	216.252	236.881	169.385	212.145	232.707	180.622	258.673	251.211	211.97	197.786	195.118	204.124	303.267	236.091	133.333	244.687	223.218	225.938
83	282.647	265.191	230.637	174.234	265.367	197.121	235.716	295.19	348.292	265.185	209.23	218.453	279.96	244.689	232.411	247.995	239.636	248.94	273.689	322.923	255.164	230.079	329.01	265.004	272.696	280.48	282.319	186.568	255.847	282.267	220.541	215.085	239.547	167.559	213.56	232.678	182.758	259.669	252.855	212.351	197.924	192.323	204.794	301.412	234.467	133.415	244.97	223.688	225.902
84	281.585	265.193	233.254	169.858	265.76	197.114	238.686	294.245	347.039	264.545	204.425	219.459	279.344	239.193	230.825	250.64	235.196	252.068	275.829	323.764	254.097	228.445	327.327	268.192	269.509	274.587	283.448	187.857	254.466	283.534	221.207	216.588	242.439	166.043	215.035	232.79	185.133	260.486	254.655	212.659	198.132	189.545	205.464	299.967	232.695	133.292	245.037	224.064	225.271
85	283.19	267.864	234.804	166.23	265.939	199.244	241.506	293.406	345.572	266.038	204.422	220.494	276.593	233.308	230.305	249.015	230.85	254.899	277.329	324.676	254.094	226.831	327.779	271.186	267.922	270.828	284.345	189.561	253.084	285.122	221.709	215.96	245.161	164.856	216.546	233.023	187.713	261.091	256.706	212.948	198.457	186.784	206.143	298.236	230.73	133.005	244.886	224.471	224.576
86	285.864	270.001	238.488	162.602	265.692	193.368	244.37	292.683	343.571	266.997	205.489	221.519	269.574	227.279	227.648	248.992	226.598	257.374	278.83	325.232	250.89	225.197	326.097	273.453	264.2	269.736	284.903	191.503	251.81	286.817	222.457	216.928	248.053	164.006	218.084	233.365	190.447	261.232	258.82	213.329	198.874	184.09	206.886	296.873	228.558	132.758	244.54	225.349	223.725
87	289.072	272.671	238.97	159.614	264.911	192.294	247.446	292.049	341.571	272.76	206.553	222.583	270.026	221.346	226.596	251.638	222.56	259.256	279.903	325.682	251.423	223.505	322.813	275.574	261.011	264.91	285.003	193.8	250.748	288.797	223.124	216.296	250.944	163.5	219.633	233.802	193.305	261.551	260.841	213.581	199.499	181.457	207.722	296.209	226.185	132.06	244.037	226.101	222.685
88	291.21	272.674	241.053	157.266	263.809	191.221	250.672	291.516	339.143	272.652	206.017	223.589	267.274	215.655	227.143	251.616	218.66	260.901	281.937	326.487	248.218	221.804	321.663	276.87	259.423	260.616	284.675	196.394	250.754	291.096	223.584	215.667	253.779	163.321	221.185	234.347	196.32	262.049	262.923	213.962	200.149	178.938	208.67	295.462	223.648	131.609	243.393	226.853	221.268
89	295.484	275.345	241.535	155.025	263.242	191.214	253.92	291.072	336.075	272.544	206.549	224.556	262.925	210.256	227.69	254.794	214.892	262.487	283.331	327.257	250.351	220.209	317.314	278.02	259.437	258.994	283.914	198.692	250.547	293.574	223.922	216.635	256.671	163.463	222.734	235.013	199.492	262.653	264.818	214.509	200.751	176.586	209.724	295.25	220.983	131.199	242.577	227.48	219.82
90	297.624	281.218	244.152	153.318	262.247	191.209	257.06	290.711	332.26	274.57	207.616	225.543	262.309	204.857	226.636	259.039	211.256	263.539	283.978	327.742	243.944	218.818	314.029	278.734	256.782	256.835	282.683	201.048	250.873	295.802	223.972	213.87	259.394	163.894	224.271	235.805	202.761	263.257	267.057	215.055	201.516	174.443	210.945	295.242	218.262	130.994	241.587	228.17	218.309
91	298.696	283.356	244.634	151.505	261.359	190.668	260.009	290.438	328.552	273.395	209.214	226.597	258.491	199.312	226.65	257.949	207.795	264.176	284.838	327.8	242.342	217.669	316.615	278.866	254.661	253.076	281.074	204.057	252.481	298.422	224.392	215.374	261.92	164.582	225.792	236.714	206.063	263.79	269.329	215.547	202.188	172.541	212.294	295.481	215.548	130.87	240.438	229.016	216.516
92	299.234	285.493	245.648	150.865	261.218	190.662	262.723	290.258	324.096	276.489	210.815	227.661	254.14	194.349	223.462	258.46	204.504	264.457	285.911	327.396	236.469	216.667	312.265	278.852	253.072	248.249	279.146	207.54	254.408	300.971	224.278	214.209	264.249	165.489	227.293	237.764	209.321	264.607	271.505	216.112	202.814	170.887	213.771	295.802	212.94	130.706	239.08	229.894	214.722
93	304.575	289.232	248.265	150.119	261.504	189.588	265.223	290.222	318.894	274.246	211.879	228.706	252.993	189.775	218.673	254.167	201.364	264.975	286.451	327.241	233.264	215.858	310.047	278.062	251.487	250.361	276.859	210.787	255.161	303.271	224.534	213.578	266.354	166.609	228.766	238.976	212.419	265.318	273.714	216.695	203.533	169.417	215.371	296.287	210.521	130.747	237.512	230.678	212.898
94	305.647	294.036	249.814	150.12	260.829	189.583	267.574	290.339	313.264	273.071	213.479	229.644	250.775	185.491	218.153	257.88	198.355	265.316	286.884	327.37	231.129	215.224	305.695	276.738	246.696	248.738	274.202	214.092	256.128	305.321	224.871	214.547	268.459	167.947	230.21	240.382	215.297	265.922	275.608	217.279	204.182	168.134	217.156	296.731	208.335	130.542	235.785	231.274	211.01
95	308.32	294.039	252.966	150.975	261.115	191.178	269.861	290.568	307.955	270.296	211.342	230.349	248.558	181.451	217.631	257.323	195.56	265.3	287.53	327.57	228.992	214.716	304.548	275.123	243.509	248.18	271.213	217.397	257.415	307.336	225.209	212.848	270.311	169.507	231.621	242	217.976	266.455	277.158	217.973	204.947	167.018	219.051	297.339	206.407	130.296	233.896	231.838	208.997
96	308.324	296.177	252.915	151.936	261.081	190.637	272.019	290.898	303.499	268.585	211.874	230.879	247.411	177.943	216.58	257.299	193.01	264.929	287.537	327.842	223.652	214.353	302.865	272.974	242.456	247.622	267.916	220.94	258.382	309.6	225.423	211.149	272.079	171.3	232.996	243.836	220.508	266.846	278.487	218.777	205.549	166.06	221.07	298.153	204.769	130.049	231.829	232.37	207.172
97	309.398	301.514	251.794	153.111	260.3	193.834	273.901	291.312	299.578	270.611	208.67	231.293	248.395	174.727	216.593	255.674	190.774	264.617	287.756	327.829	221.516	214.321	299.046	270.438	243.002	248.667	264.411	224.838	259.562	312.042	225.433	212.119	273.313	173.332	234.336	245.846	222.964	267.058	279.722	219.655	206.222	165.288	223.196	298.802	203.389	129.885	229.609	233.06	205.599
98	312.604	303.652	254.945	154.499	259.412	192.761	275.526	291.759	296.83	268.903	209.202	231.571	247.779	171.705	217.142	256.187	188.908	264.068	288.083	327.923	219.38	214.57	294.162	267.076	240.348	244.375	260.681	229.389	261.81	314.235	225.113	213.089	274.294	175.57	235.641	247.978	225.431	267.164	280.863	220.57	206.894	164.689	225.433	299.862	202.303	129.926	227.295	233.624	203.868
99	314.743	306.856	257.563	157.062	258.737	195.422	276.894	292.276	294.509	267.728	209.733	231.723	246.632	168.974	215.553	256.163	187.444	263.46	288.623	327.91	215.108	215.09	294.081	263.472	238.761	245.952	256.793	233.94	264.057	316.322	224.671	214.594	275.135	177.971	236.916	250.163	227.967	267.306	281.847	221.521	207.241	164.22	227.726	300.716	201.559	129.721	224.916	234.188	202.42
100	314.215	305.257	258.043	159.305	258.169	199.152	278.114	292.889	291.869	263.884	212.4	231.816	246.55	166.389	213.966	255.072	186.282	262.14	288.842	328.11	212.971	215.795	286.527	259.383	236.64	245.397	252.749	237.72	266.946	318.194	224.106	213.428	275.892	180.491	238.163	252.351	230.564	267.697	282.391	222.639	207.496	163.908	230.125	301.407	201.192	129.721	222.541	234.909	200.909
101	314.219	303.66	259.594	162.294	257.815	197.011	279.205	293.61	288.481	265.376	210.798	231.784	244.333	164.289	217.714	254.515	185.389	260.939	289.488	328.56	210.301	216.636	281.641	254.808	236.119	244.305	248.547	241.44	269.62	319.96	223.786	215.999	276.564	183.076	239.38	254.493	233.201	268.159	282.716	223.774	207.681	163.753	232.674	302.385	201.185	129.474	220.2	235.881	199.43
102	318.493	302.594	260.609	164.963	257.887	196.47	280.36	294.446	286.16	267.937	209.727	231.586	241.583	162.674	216.662	254.491	184.704	259.204	289.494	328.653	209.233	217.496	279.96	250.04	233.465	247.483	244.113	245.279	272.081	321.655	223.426	213.767	276.984	185.689	240.566	256.548	235.846	268.585	283.01	224.873	207.842	163.75	235.351	303.157	201.542	129.105	217.931	236.759	198.264
103	320.098	302.063	258.956	168.486	257.533	194.863	281.644	295.394	283.625	264.627	209.192	231.282	244.17	161.448	216.675	256.071	184.232	256.402	288.86	328.249	209.23	218.453	279.344	244.689	232.411	247.995	239.636	248.94	273.689	322.923	223.435	214.735	277.291	188.321	241.727	258.45	238.473	269.011	283.083	226.009	207.842	163.96	238.155	303.93	202.209	128.612	215.714	237.229	197.067
104	322.238	300.998	256.77	171.689	256.965	195.926	282.991	296.472	281.732	262.917	208.121	230.919	243.02	160.609	216.689	253.377	183.961	253.184	288.332	327.916	204.425	219.459	276.593	239.193	230.825	250.64	235.196	252.068	275.829	323.764	223.198	215.172	277.542	190.945	242.865	260.144	241.062	269.509	283.251	227.107	207.702	164.413	241.088	304.907	203.217	128.119	213.552	237.919	196.09
105	323.843	301	257.784	175.746	256.184	196.986	284.104	297.619	281.226	259.075	209.188	230.596	244.54	160.061	217.238	257.091	183.91	250.026	288.126	327.582	204.422	220.494	269.574	233.308	230.305	249.015	230.85	254.899	277.329	324.676	223.453	212.941	277.428	193.534	243.987	261.586	243.604	270.184	283.01	228.022	207.469	165.112	244.128	305.844	204.596	127.914	211.45	238.389	195.333
106	323.848	297.267	263.07	179.803	256.149	198.049	284.918	298.878	281.894	256.831	207.05	230.359	240.189	160.144	217.783	257.067	184.035	246.216	287.812	327.249	205.489	221.519	270.026	227.279	227.648	248.992	226.598	257.374	278.83	325.232	223.668	216.044	277.341	196.076	245.102	262.758	246.067	270.752	283.021	228.863	207.213	166.024	247.24	306.616	206.385	127.462	209.457	239.078	194.607
107	327.055	296.203	264.62	183.753	255.368	201.244	285.39	300.248	282.882	256.189	208.116	230.133	242.241	160.325	216.197	258.644	184.417	242.227	287.177	327.129	206.553	222.583	267.274	221.346	226.596	251.638	222.56	259.256	279.903	325.682	223.923	216.481	277.087	198.563	246.231	263.663	248.395	270.858	282.656	229.704	206.818	167.128	250.395	307.594	208.585	127.257	207.566	239.737	194.07
108	328.127	293.001	266.168	187.063	254.694	199.638	285.435	301.702	283.763	258.217	203.846	229.877	242.159	160.748	218.344	259.69	185.088	237.943	287.183	326.903	206.017	223.589	262.925	215.655	227.143	251.616	218.66	260.901	281.937	326.487	223.933	217.985	276.439	200.974	247.38	264.348	250.508	270.786	282.133	230.564	206.237	168.344	253.597	308.408	211.129	127.134	205.828	240.583	193.783
109	329.2	289.802	266.116	189.411	254.126	197.496	285.097	303.183	285.819	259.175	204.377	229.65	244.214	161.365	219.96	261.801	185.997	234.132	286.229	326.072	206.549	224.556	262.309	210.256	227.69	254.794	214.892	262.487	283.331	327.257	224.352	217.887	275.707	203.314	248.563	264.847	252.318	270.857	281.359	231.203	205.54	169.667	256.816	309.385	213.958	127.052	204.296	241.649	193.716
110	330.27	286.601	263.933	189.839	254.199	196.422	284.587	304.683	287.447	258	205.444	229.395	245.733	161.836	223.71	266.048	187.189	230.322	284.847	324.813	207.616	225.543	258.491	204.857	226.636	259.039	211.256	263.539	283.978	327.742	225.224	219.39	275.087	205.593	249.793	265.197	253.76	270.998	280.585	231.731	204.681	171.096	260.005	310.322	216.967	126.928	203.014	243.03	193.493
111	330.275	283.403	263.881	191.014	253.204	196.949	284.056	306.156	289.502	256.292	203.306	229.09	245.651	162.404	223.724	266.559	188.657	226.393	282.719	323.626	209.214	226.597	254.14	199.312	226.65	257.949	207.795	264.176	284.838	327.8	226.3	221.428	274.439	207.825	251.074	265.418	254.807	270.962	279.842	232.278	203.706	172.627	263.104	311.177	220.043	126.805	201.956	244.849	193.207
112	332.949	279.136	267.03	193.15	252.85	195.343	283.504	307.577	291.238	257.25	205.44	228.777	244.503	163.118	223.737	267.067	190.232	222.878	281.231	322.652	210.815	227.661	252.993	194.349	223.462	258.46	204.504	264.457	285.911	327.396	227.541	223.466	273.651	209.987	252.4	265.53	255.477	270.89	278.911	232.732	202.777	174.242	266.092	312.401	223.099	126.559	201.155	246.701	193.14
113	335.621	277.003	268.58	194.965	252.709	191.601	282.909	308.929	293.827	258.744	207.037	228.472	247.088	164.123	225.353	267.045	191.832	219.602	279.422	321.928	211.879	228.706	250.775	189.775	218.673	254.167	201.364	264.975	286.451	327.241	229.028	226.037	272.553	212.061	253.766	265.553	255.814	271.032	278.012	232.984	201.662	175.924	268.859	313.707	226.119	126.189	200.597	248.897	192.979
114	337.761	277.006	267.994	196.033	253.102	190.528	282.399	310.192	296.096	257.568	206.502	228.091	249.142	164.789	225.901	270.759	193.489	216.147	278.147	321.452	213.479	229.644	248.558	185.491	218.153	257.88	198.355	265.316	286.884	327.37	230.638	227.539	271.259	214.03	255.162	265.514	255.863	271.209	277.206	233.2	200.617	177.685	271.339	315.054	228.993	126.107	200.232	251.25	192.818
115	337.232	271.137	266.875	199.129	252.748	189.988	281.974	311.353	299.219	254.791	204.899	227.66	251.728	165.017	227.514	273.404	195.202	212.811	277.086	320.87	211.342	230.349	247.411	181.451	217.631	257.323	195.56	265.3	287.53	327.57	232.249	229.042	269.657	215.869	256.577	265.439	255.662	271.422	276.213	233.231	199.642	179.519	273.572	316.401	231.693	126.148	200.029	253.886	192.752
116	339.371	271.674	267.89	202.011	252.394	187.313	281.55	312.343	302.983	255.217	205.432	227.123	253.247	165.392	228.061	274.447	196.984	209.534	276.451	319.968	211.874	230.879	248.395	177.943	216.58	257.299	193.01	264.929	287.537	327.842	233.613	232.682	267.913	217.55	257.987	265.348	255.226	271.563	275.219	233.263	198.435	181.409	275.578	317.872	234.185	126.148	200.007	256.585	192.559
117	339.377	266.339	267.838	203.613	251.826	185.173	281.125	313.165	306.746	251.907	206.495	226.538	253.165	165.572	229.143	274.958	198.948	206.554	275.817	319.812	208.67	231.293	247.779	174.727	216.593	255.674	190.774	264.617	287.756	327.829	234.813	233.651	266.198	219.08	259.381	265.247	254.543	271.598	274.32	233.092	197.251	183.372	277.384	319.014	236.424	125.902	200.155	259.347	192.618
118	340.448	266.874	271.522	204.255	251.258	183.565	280.828	313.821	310.616	253.401	208.095	225.981	252.016	165.558	230.224	277.604	201.094	204.048	275.503	320.084	209.202	231.571	246.632	171.705	217.142	256.187	188.908	264.068	288.083	327.923	236.094	235.688	264.202	220.474	260.739	265.137	253.62	271.419	273.2	232.681	196.09	185.431	279.032	320.279	238.348	125.656	200.461	262.108	192.897
119	343.653	264.207	273.071	206.497	250.477	182.492	280.574	314.295	314.593	256.495	211.829	225.502	254.071	165.981	229.704	280.248	203.398	201.898	275.402	320.391	209.733	231.723	246.55	168.974	215.553	256.163	187.444	263.46	288.623	327.91	236.925	239.862	261.812	221.741	262.056	264.998	252.499	271.063	272.018	232.142	195.022	187.613	280.539	321.872	239.953	125.697	200.916	265.278	193.176
120	343.127	265.279	273.019	207.138	250.336	179.284	280.299	314.589	317.715	255.319	213.429	225.091	254.521	166.113	235.054	285.03	205.77	200.044	276.049	320.805	212.4	231.816	244.333	166.389	213.966	255.072	186.282	262.14	288.842	328.11	237.837	242.431	259.226	222.898	263.32	264.821	251.246	270.457	270.836	231.474	194.023	189.835	281.815	323.301	241.232	125.943	201.562	268.574	193.392
121	345.798	264.212	272.968	207.246	250.409	176.609	280.024	314.734	321.265	258.414	215.561	224.777	259.245	166.632	234	285.006	208.237	198.309	276.589	321.184	210.798	231.784	241.583	164.289	217.714	254.515	185.389	260.939	289.488	328.56	238.749	244.469	256.584	223.949	264.528	264.594	249.942	269.923	269.528	230.641	193.002	192.107	282.784	324.772	242.179	126.108	202.371	271.837	193.544
122	347.939	263.149	270.78	207.994	252.189	179.273	279.642	314.661	324.815	256.704	215.56	224.493	261.831	167.201	237.751	281.779	210.716	196.87	277.235	321.527	209.727	231.586	244.17	162.674	216.662	254.491	184.704	259.204	289.494	328.653	239.292	248.64	253.605	224.869	265.678	264.322	248.686	269.637	268.346	229.678	192.096	194.379	283.42	326.078	242.772	125.902	203.317	275.352	193.855
123	350.077	261.549	273.933	210.129	254.397	179.266	279.197	314.36	328.152	260.332	219.295	224.188	261.749	167.332	235.095	287.093	213.207	195.669	277.989	322.119	209.192	231.282	243.02	161.448	216.675	256.071	184.232	256.402	288.86	328.249	239.26	250.143	250.57	225.655	266.768	264.008	247.549	269.423	267.007	228.495	191.237	196.624	283.727	327.466	243.005	125.492	204.378	278.616	194.102
124	351.684	258.885	270.678	212.052	256.604	179.793	278.602	313.8	331.488	261.291	221.426	223.865	262.734	167.367	234.042	286.537	215.617	195.061	278.955	323.102	208.121	230.919	244.54	160.609	216.689	253.377	183.961	253.184	288.332	327.916	239.31	252.181	247.647	226.316	267.786	263.661	246.536	268.889	265.699	227.257	190.494	198.783	283.74	329.101	242.816	125.04	205.561	281.943	194.255
125	352.755	263.69	272.228	214.187	258.812	181.921	277.879	312.979	335.572	261.182	221.958	223.629	264.253	167.693	235.657	284.379	217.914	195.105	279.495	324.263	209.188	230.596	240.189	160.061	217.238	257.091	183.91	250.026	288.126	327.582	239.114	256.355	244.021	226.843	268.733	263.274	245.6	268.212	264.423	225.742	189.704	200.909	283.428	330.694	242.163	124.753	206.786	284.924	194.408
126	354.896	262.624	271.643	216.322	261.019	186.184	277.049	311.899	338.055	262.142	224.624	223.47	265.772	168.213	238.873	285.956	220.13	195.267	280.889	325.211	207.05	230.359	242.241	160.144	217.783	257.067	184.035	246.216	287.812	327.249	238.754	258.925	240.396	227.237	269.599	262.843	244.677	267.82	263.241	224.062	188.984	202.979	282.791	331.918	241.071	124.507	208.068	287.623	194.686
127	355.434	265.295	271.057	217.924	261.946	186.711	276.305	310.577	340.43	263.635	229.427	223.428	266.224	168.829	245.29	284.867	222.257	195.489	282.283	325.945	208.116	230.133	242.159	160.325	216.197	258.644	184.417	242.227	287.177	327.129	238.106	260.963	236.967	227.533	270.374	262.362	243.693	267.463	261.965	222.327	188.241	205.055	281.847	333.265	239.568	124.301	209.407	290.259	195.154
128	356.505	266.365	271.005	219.846	262.766	190.977	275.539	309.029	342.486	265.662	231.559	223.522	267.743	169.058	246.371	285.376	224.297	195.889	283.889	326.252	203.846	229.877	244.214	160.748	218.344	259.69	185.088	237.943	287.183	326.903	237.376	259.797	233.258	227.731	271.056	261.829	242.583	267.178	260.657	220.5	187.707	207.119	280.587	334.571	237.667	124.014	210.811	292.267	195.746
129	358.11	269.036	272.02	221.235	263.585	193.638	274.922	307.257	343.26	266.089	236.361	223.732	271.4	169.335	248.521	289.624	226.386	196.941	285.71	326.63	204.377	229.65	245.733	161.365	219.96	261.801	185.997	234.132	286.229	326.072	236.687	260.233	229.689	227.809	271.644	261.248	241.344	266.999	259.632	218.635	187.219	209.161	279.046	335.796	235.44	123.644	212.236	294.087	196.276
130	358.649	270.64	274.638	224.545	264.085	198.969	274.412	305.281	342.861	263.31	241.694	223.942	274.519	169.079	250.136	287.999	228.526	198.586	287.958	326.973	205.444	229.395	245.651	161.836	223.71	266.048	187.189	230.322	284.847	324.813	235.957	260.67	225.895	227.765	272.133	260.636	240.021	266.571	258.418	216.679	186.824	211.158	277.27	337.266	232.972	123.357	213.703	295.498	196.994
131	360.255	274.91	275.119	227	264.798	197.897	274.052	303.11	342.354	262.136	243.294	224.172	274.971	169.065	251.217	288.508	230.635	200.469	289.459	327.245	203.306	229.09	244.503	162.404	223.724	266.559	188.657	226.393	282.719	323.626	234.94	263.239	222.326	227.613	272.519	260.007	238.677	266.179	257.079	214.742	186.591	213.11	275.31	338.695	230.274	123.193	215.185	296.314	197.838
132	358.124	280.784	275.602	228.389	265.724	202.158	273.691	300.791	341.635	259.893	243.826	224.498	275.423	168.614	254.431	291.689	232.669	202.766	291.493	326.947	205.44	228.777	247.088	163.118	223.737	267.067	190.232	222.878	281.231	322.652	234.128	262.609	218.785	227.334	272.796	259.362	237.372	266.143	255.991	212.749	186.451	214.989	273.2	339.837	227.419	122.988	216.688	296.878	198.838
133	360.798	283.99	273.949	228.176	266.971	204.821	273.331	298.365	340.915	262.454	248.627	224.912	276.409	168.164	256.581	291.665	234.645	205.182	293.207	326.258	207.037	228.472	249.142	164.123	225.353	267.045	191.832	219.602	279.422	321.928	232.988	260.91	215.581	226.93	272.958	258.697	236.149	266.284	254.966	210.792	186.334	216.789	270.976	340.815	224.465	122.577	218.18	297.065	199.964
134	362.401	288.794	271.228	228.283	268.858	201.612	272.8	295.855	341.369	268.216	250.76	225.442	277.393	168.15	258.197	288.974	236.478	207.479	295.134	325.426	206.502	228.091	251.728	164.789	225.901	270.759	193.489	216.147	278.147	321.452	231.93	257.611	212.489	226.425	272.996	258.01	235.026	266.711	254.004	208.965	186.148	218.511	268.661	341.464	221.424	122.084	219.654	296.625	201.059
135	362.941	290.932	269.578	226.683	270.105	205.877	272.226	293.28	342.144	267.575	251.826	226.05	279.448	167.797	257.142	291.086	238.185	210.132	296.421	324.31	204.899	227.66	253.247	165.017	227.514	273.404	195.202	212.811	277.086	320.87	230.954	259.114	209.706	225.829	272.898	257.301	233.994	267.421	253.418	207.083	185.892	220.16	266.308	341.867	218.309	121.838	221.108	295.901	202.249
136	363.479	295.203	271.659	225.723	271.138	213.874	271.652	290.697	342.385	268.533	252.893	226.648	280.433	167.783	258.224	292.663	239.753	213.2	298.242	322.945	205.432	227.123	253.165	165.392	228.061	274.447	196.984	209.534	276.451	319.968	229.978	258.484	207.261	225.142	272.657	256.569	233.025	267.954	252.833	205.126	185.938	221.662	263.973	342.517	215.191	121.797	222.512	294.456	203.343
137	361.349	299.476	271.607	225.404	271.957	215.47	271.314	288.122	342.519	270.561	255.023	227.256	279.818	167.963	256.636	293.707	241.328	216.09	299.635	321.367	206.495	226.538	252.016	165.572	229.143	274.958	198.948	206.554	275.817	319.812	229.002	255.183	205.096	224.374	272.272	255.819	232.089	268.523	252.435	203.115	185.914	223.041	261.68	342.878	212.064	121.715	223.809	292.791	204.752
138	362.42	303.747	271.555	226.899	272.671	218.666	271.124	285.547	342.867	266.182	260.358	227.835	277.067	167.949	259.852	296.353	242.866	219.336	300.922	319.362	208.095	225.981	254.071	165.558	230.224	277.604	201.094	204.048	275.503	320.084	227.944	253.484	203.184	223.529	271.747	255.055	231.175	269.127	252.007	201.214	185.89	224.308	259.506	342.953	208.937	121.92	225.03	290.656	206.255
139	364.027	304.817	269.902	228.181	272.637	218.661	271.106	282.991	342.681	266.074	264.093	228.345	276.454	168.469	262	295.262	244.416	222.879	302.423	317.214	211.829	225.502	254.521	165.981	229.704	280.248	203.398	201.898	275.402	320.391	226.762	248.584	201.694	222.61	271.1	254.242	230.273	270.051	251.672	199.405	186.005	225.434	257.499	343.479	205.862	122.043	226.156	288.143	207.633
140	366.701	306.953	269.85	228.929	273.35	221.856	271.108	280.505	341.748	265.966	266.761	228.74	278.505	169.037	260.946	295.238	246.047	226.599	303.817	315.066	213.429	225.091	259.245	166.113	235.054	285.03	205.77	200.044	276.049	320.805	225.622	247.419	200.456	221.623	270.344	253.347	229.358	270.905	251.275	197.615	186.236	226.364	255.603	343.718	202.893	121.92	227.17	285.317	209.198
141	368.84	309.091	267.666	228.61	274.384	223.985	271.089	278.074	341.455	264.792	265.156	229.028	281.625	169.8	259.892	298.416	247.81	230.083	304.783	312.954	215.561	224.777	261.831	166.632	234	285.006	208.237	198.309	276.589	321.184	224.646	246.256	199.331	220.593	269.51	252.362	228.419	271.722	251.003	195.806	186.352	227.203	253.771	343.916	200.072	121.797	228.064	282.019	210.702
142	368.311	312.295	267.614	228.184	275.524	227.715	270.75	275.722	340.416	262.015	271.026	229.073	282.613	170.805	259.372	298.394	249.655	233.863	305.43	310.877	215.56	224.493	261.749	167.201	237.751	281.779	210.716	196.87	277.235	321.527	223.588	239.218	198.374	219.535	268.62	251.286	227.439	272.54	250.889	194.218	186.583	227.93	251.982	343.908	197.466	121.756	228.865	278.094	212.267
143	369.917	313.898	268.629	227.01	276.237	229.844	270.091	273.459	339.056	259.239	272.09	228.904	283.598	172.101	262.056	299.972	251.557	237.583	305.543	308.872	219.295	224.188	262.734	167.332	235.095	287.093	213.207	195.669	277.989	322.119	222.694	238.052	197.726	218.469	267.701	250.131	226.38	273.215	250.962	192.795	186.768	228.517	250.214	343.654	195.224	121.92	229.571	274.137	213.645
144	372.056	314.969	266.442	225.41	277.27	233.041	269.219	271.302	337.696	262.332	272.089	228.513	285.65	173.737	262.069	301.017	253.54	241.304	304.161	306.475	221.426	223.865	264.253	167.367	234.042	286.537	215.617	195.061	278.955	323.102	221.964	228.884	197.696	217.415	266.777	248.952	225.191	273.784	251.13	191.391	187.092	228.947	248.455	343.4	193.357	121.797	230.224	269.773	214.991
145	372.593	312.837	265.856	223.596	278.303	239.438	268.325	269.242	336.762	262.225	273.686	228.015	283.969	175.227	263.685	299.925	255.642	244.728	302.993	304.256	221.958	223.629	265.772	167.693	235.657	284.379	217.914	195.105	279.495	324.263	221.112	222.916	197.919	216.388	265.87	247.792	223.823	274.423	251.266	189.987	187.416	229.292	246.802	343.228	191.843	121.427	230.817	265.282	216.399
146	372.064	312.305	266.872	222.102	278.802	245.302	267.132	267.271	334.869	257.312	277.422	227.516	284.953	177.105	266.901	297.234	257.839	248.211	302.039	301.788	224.624	223.47	266.224	168.213	238.873	285.956	220.13	195.267	280.889	325.211	220.505	219.082	198.395	215.372	265.007	246.677	222.218	275.134	251.309	188.73	187.671	229.503	245.333	343.016	190.678	120.894	231.372	260.604	217.714
147	372.07	310.172	270.557	220.075	278.555	245.295	265.832	265.406	333.828	254.003	276.352	227.086	286.472	178.886	264.779	300.413	260.186	251.102	301.084	299.356	229.427	223.428	267.743	168.829	245.29	284.867	222.257	195.489	282.283	325.945	220.022	218.984	199.348	214.378	264.205	245.629	220.345	275.525	251.665	187.529	188.088	229.573	244.082	342.926	189.856	120.606	231.867	255.831	218.715
148	374.209	311.243	269.971	217.514	278.734	246.892	264.575	263.672	332.468	254.43	275.284	226.597	287.992	180.765	265.327	302.525	262.728	253.814	300.343	296.959	231.559	223.522	271.4	169.058	246.371	285.376	224.297	195.889	283.889	326.252	219.292	216.219	200.217	213.416	263.486	244.696	218.194	275.844	252.241	186.364	188.551	229.514	243.027	342.877	189.285	120.36	232.303	251.089	219.653
149	379.55	308.043	267.785	215.06	279.021	252.222	263.34	262.1	330.574	253.787	277.416	226.099	290.579	183.371	263.205	304.103	265.515	256.23	299.496	294.74	236.361	223.732	274.519	169.335	248.521	289.624	226.386	196.941	285.71	326.63	218.85	211.85	201.423	212.492	262.868	243.913	215.802	275.594	252.879	185.438	189.038	229.348	242.165	342.418	188.946	120.196	232.644	246.254	220.214
150	379.554	305.375	268.802	212.713	278.88	252.215	261.976	260.69	328.894	255.281	280.616	225.601	292.631	186.268	260.55	303.013	268.509	258.705	298.541	292.948	241.694	223.942	274.971	169.079	250.136	287.999	228.526	198.586	287.958	326.973	218.489	208.551	202.741	211.614	262.374	243.336	213.251	275.131	253.549	184.697	189.687	229.047	241.49	342	188.854	120.032	232.932	241.261	220.681
151	376.891	303.778	267.149	210.365	278.525	257.014	260.826	259.438	328.281	253.572	279.014	225.132	295.22	189.311	262.166	299.785	271.772	260.706	296.946	291.334	243.294	224.172	275.423	169.065	251.217	288.508	230.635	200.469	289.459	327.245	218.498	206.852	204.088	210.829	262.026	243	210.655	274.704	254.376	183.992	190.15	228.673	240.964	341.787	188.992	119.539	233.166	236.582	221.242
152	377.429	301.644	269.764	208.445	278.811	261.811	259.761	258.321	327.668	254.53	275.809	224.721	299.94	192.451	263.78	303.5	275.281	262.707	294.817	289.898	243.826	224.498	276.409	168.614	254.431	291.689	232.669	202.766	291.493	326.947	218.672	200.352	205.603	210.154	261.837	242.916	208.115	274.311	255.172	183.453	190.613	228.204	240.567	341.369	189.333	119.293	233.363	232.061	221.615
153	378.502	302.181	268.646	206.952	278.457	261.805	258.739	257.315	327.056	253.355	274.206	224.494	300.925	195.736	263.26	305.612	279.06	264.233	292.475	288.782	248.627	224.912	277.393	168.164	256.581	291.665	234.645	205.182	293.207	326.258	218.968	195.452	207.23	209.601	261.829	243.05	205.747	273.919	255.999	182.895	190.938	227.639	240.294	340.91	189.911	118.923	233.532	227.57	221.925
154	373.703	297.381	269.126	206.098	277.782	262.864	257.759	256.416	326.87	252.178	273.669	224.413	300.843	199.07	265.41	305.054	282.99	265.641	289.919	287.524	250.76	225.442	279.448	168.15	258.197	288.974	236.478	207.479	295.134	325.426	219.388	191.617	208.633	209.189	262.008	243.373	203.639	273.207	256.701	182.485	191.238	226.973	240.11	340.451	190.802	118.677	233.719	223.049	222.141
155	376.374	294.18	269.074	206.74	277.001	264.46	256.93	255.609	326.47	254.206	272.602	224.555	301.831	201.967	264.889	304.498	287.032	266.871	287.364	286.159	251.826	226.05	280.433	167.797	257.142	291.086	238.185	210.132	296.421	324.31	220.177	185.65	210.035	208.933	262.383	243.825	201.848	272.673	257.716	182.112	191.516	226.307	239.956	340.033	191.918	118.472	233.882	219.092	222.294
156	372.644	292.048	268.491	207.381	276.967	263.386	256.164	254.886	325.324	255.167	271.533	224.785	306.551	204.864	263.302	303.406	291.2	268.042	284.595	284.829	252.893	226.648	279.818	167.783	258.224	292.663	239.753	213.2	298.242	322.945	220.966	184.484	211.466	208.842	262.954	244.377	200.406	271.925	258.951	181.812	191.678	225.574	239.849	339.574	193.268	118.143	234.026	215.292	222.29
157	369.447	289.916	268.439	208.769	277.68	264.448	255.505	254.27	323.964	254.524	268.33	225.043	309.138	207.519	262.781	302.851	295.475	268.916	281.612	283.536	255.023	227.256	277.067	167.963	256.636	293.707	241.328	216.09	299.635	321.367	221.878	181.185	212.897	208.927	263.719	245.01	199.344	270.999	260.249	181.512	191.979	224.762	239.772	338.95	194.857	117.897	234.15	211.775	222.192
158	368.919	287.784	267.853	210.158	278.18	262.841	254.824	253.78	322.817	250.145	266.726	225.282	309.591	209.737	261.728	303.361	299.787	269.375	278.417	282.349	260.358	227.835	276.454	167.949	259.852	296.353	242.866	219.336	300.922	319.362	222.709	178.42	214.44	209.192	264.665	245.717	198.647	270.073	261.798	181.268	192.466	223.928	239.665	337.999	196.64	117.815	234.258	208.54	222.188
159	367.322	288.853	264.065	211.012	278.573	262.3	254.08	253.4	322.098	250.038	264.589	225.619	312.71	212.1	261.741	304.406	304.156	270.012	275.861	281.375	264.093	228.345	278.505	168.469	262	295.262	244.416	222.879	302.423	317.214	223.744	173.518	216.067	209.634	265.779	246.464	198.283	269.04	263.473	181.078	192.79	223.11	239.541	337.252	198.503	117.815	234.336	205.902	222.027
160	364.657	285.654	262.948	210.8	279.712	262.294	253.378	253.146	321.485	249.929	260.85	226.062	309.961	213.591	257.486	303.848	308.594	270.708	272.985	280.224	266.761	228.74	281.625	169.037	260.946	295.238	246.047	226.599	303.817	315.066	224.533	172.353	218.088	210.235	267.041	247.241	198.207	267.972	265.336	180.87	193.207	222.186	239.404	336.916	200.477	117.856	234.416	203.17	221.741
161	361.994	284.588	261.828	210.8	280.532	261.222	252.719	253.068	321.299	251.423	258.714	226.621	308.812	214.45	257.499	305.426	312.97	271.048	269.896	279.641	265.156	229.028	282.613	169.8	259.892	298.416	247.81	230.083	304.783	312.954	225.446	170.12	220.136	210.952	268.433	248.048	198.339	266.762	267.262	180.589	193.554	221.205	239.241	336.621	202.498	117.733	234.499	200.846	221.58
162	360.931	281.388	262.31	210.268	280.605	261.75	252.038	253.172	321.433	249.713	252.842	227.336	308.73	215.067	256.98	304.336	317.175	271.448	267.127	279.272	271.026	229.073	283.598	170.805	259.372	298.394	249.655	233.863	305.43	310.877	226.112	167.355	222.072	211.743	269.93	248.899	198.584	265.623	269.439	180.326	193.762	220.242	239.07	336.162	204.503	117.364	234.559	198.867	221.231
163	357.201	283.526	262.259	209.734	280.997	261.744	251.443	253.437	321.567	250.673	252.841	228.313	309.182	215.053	261.263	302.712	321.243	271.788	264.037	278.904	272.09	228.904	285.65	172.101	262.056	299.972	251.557	237.583	305.543	308.872	226.942	167.792	224.009	212.576	271.513	249.812	198.865	264.626	271.522	180.008	193.715	219.317	238.895	335.826	206.472	116.953	234.558	197.171	221.29
164	355.071	283.528	257.403	209.094	281.283	260.67	251.104	253.856	321.808	252.702	250.704	229.396	308.034	214.457	260.743	303.221	325.147	271.832	260.734	278.5	272.089	228.513	283.969	173.737	262.069	301.017	253.54	241.304	304.161	306.475	227.526	165.024	225.833	213.413	273.138	250.845	199.113	263.807	273.699	179.855	193.506	218.393	238.681	335.244	208.42	116.542	234.514	195.788	221.223
165	356.142	285.667	255.75	208.988	280.929	258.529	250.594	254.414	322.369	254.726	248.033	230.49	306.884	213.327	261.824	298.394	328.826	271.402	258.499	278.06	273.686	228.015	284.953	175.227	263.685	299.925	255.642	244.728	302.993	304.256	227.782	165.462	227.769	214.228	274.781	252.033	199.282	263.094	275.907	179.721	193.227	217.486	238.433	334.58	210.412	116.05	234.441	194.72	221.125
166	352.409	280.864	254.629	209.95	281.215	257.989	249.85	255.102	322.61	255.686	245.363	231.709	310.003	211.906	258.636	299.972	332.234	270.972	257.01	277.904	277.422	227.516	286.472	177.105	266.901	297.234	257.839	248.211	302.039	301.788	227.914	165.899	229.733	215.009	276.394	253.402	199.388	262.56	278.053	179.66	193.064	216.595	238.16	333.751	212.404	115.927	234.308	193.84	221.309
167	348.146	279.266	251.376	210.485	280.221	255.315	249.019	255.892	322.851	254.511	245.895	233.171	305.118	210.049	259.185	299.415	335.329	270.601	255.843	277.713	276.352	227.086	287.992	178.886	264.779	300.413	260.186	251.102	301.084	299.356	227.882	165.801	231.613	215.738	277.944	254.952	199.468	261.883	280.198	179.637	192.831	215.715	237.818	332.963	214.413	115.844	234.153	193.4	221.745
168	345.482	277.667	249.192	210.912	279.44	256.909	248.189	256.78	323.625	255.47	243.758	234.875	301.835	207.755	259.729	299.926	338.04	269.933	255.102	277.487	275.284	226.597	290.579	180.765	265.327	302.525	262.728	253.814	300.343	296.959	227.522	164.635	233.466	216.379	279.385	256.683	199.56	261.242	282.25	179.686	192.575	214.802	237.399	332.258	216.417	115.68	233.988	193.242	222.118
169	344.419	280.337	247.004	211.768	278.765	257.971	247.338	257.82	324.187	254.828	242.154	236.958	301.753	205.218	264.015	298.301	340.356	268.613	255.001	277.438	277.416	226.099	292.631	183.371	263.205	304.103	265.515	256.23	299.496	294.74	227.038	164.537	235.486	216.897	280.688	258.572	199.717	260.672	284.113	179.754	192.296	213.945	236.904	331.717	218.434	115.27	233.776	192.927	222.49
170	342.823	280.875	245.351	212.195	277.984	255.296	246.785	258.995	324.748	256.855	237.35	239.39	301.136	202.293	265.095	296.678	342.276	267.175	254.793	277.639	280.616	225.601	295.22	186.268	260.55	303.013	268.509	258.705	298.541	292.948	226.267	163.906	237.282	217.257	281.819	260.601	199.978	259.817	285.945	179.878	191.877	213.122	236.331	331.093	220.332	114.941	233.506	193.114	222.894
171	338.024	280.876	243.164	211.662	276.242	254.222	246.638	260.305	326.59	255.679	236.28	242.065	300.524	199.368	268.31	293.986	343.845	265.44	254.373	277.946	279.014	225.132	299.94	189.311	262.166	299.785	271.772	260.706	296.946	291.334	225.702	161.674	238.994	217.421	282.756	262.733	200.328	259.14	287.776	179.983	191.505	212.4	235.686	330.47	222.172	114.654	233.213	193.521	223.299
172	337.494	280.345	240.446	211.77	275.354	255.816	246.918	261.703	328.539	258.241	234.143	244.973	300.974	195.958	269.392	295.565	345.087	263.467	254.166	278.396	275.809	224.721	300.925	192.451	263.78	303.5	275.281	262.707	294.817	289.898	224.767	163.178	240.902	217.354	283.476	264.939	200.729	258.499	289.42	180.106	191.11	211.723	234.96	329.764	223.889	114.49	232.884	193.865	223.703
173	339.101	281.949	236.123	211.984	274.253	255.811	247.497	263.18	330.274	254.395	230.94	248.055	301.426	192.354	273.14	292.872	345.959	261.555	254.919	279.13	274.206	224.494	300.843	195.736	263.26	305.612	279.06	264.233	292.475	288.782	223.955	159.879	243.035	217.042	283.973	267.177	201.149	257.787	290.749	180.34	190.553	211.124	234.2	328.936	225.47	114.325	232.542	194.273	224.327
174	340.706	283.017	233.937	212.198	273.258	253.137	248.097	264.69	332.116	258.558	227.737	251.195	299.745	188.701	274.223	291.248	346.435	259.701	255.779	280.042	273.669	224.413	301.831	199.07	265.41	305.054	282.99	265.641	289.919	287.524	223.307	160.314	245.252	216.465	284.233	269.417	201.535	257.324	291.984	180.666	190.088	210.503	233.388	328.025	226.902	114.038	232.226	194.68	224.92
175	338.041	285.156	233.886	211.772	272.156	253.131	248.591	266.241	334.492	259.519	227.734	254.472	294.86	184.952	276.904	289.624	346.566	257.432	256.532	281.061	272.602	224.555	306.551	201.967	264.889	304.498	287.032	266.871	287.364	286.159	222.782	159.684	247.16	215.602	284.248	271.614	201.847	257.11	292.842	180.992	189.461	209.95	232.543	327.402	228.241	113.791	231.865	195.306	225.387
176	338.047	281.421	229.03	211.239	271.268	256.327	248.914	267.824	336.334	258.341	224.529	257.991	294.778	181.59	280.656	289.066	346.339	255.341	257.392	281.795	271.533	224.785	309.138	204.864	263.302	303.406	291.2	268.042	284.595	284.829	222.012	159.586	249.04	214.446	284.019	273.738	202.074	256.789	293.167	181.318	188.903	209.379	231.646	326.697	229.453	113.627	231.489	195.933	225.759
177	339.118	282.492	230.046	210.813	271.021	256.854	249.002	269.464	338.71	264.105	221.859	261.548	294.163	178.471	284.937	287.977	345.779	252.539	258.252	282.671	268.33	225.043	309.591	207.519	262.781	302.851	295.475	268.916	281.612	283.536	221.282	156.818	250.836	212.985	283.539	275.758	202.238	256.503	293.335	181.662	188.276	208.848	230.753	326.237	230.607	113.668	231.131	196.717	226.321
178	335.921	283.028	229.46	211.027	270.346	256.849	249.026	271.163	340.873	265.063	219.19	265.087	291.413	175.546	284.418	286.352	344.925	249.856	258.579	283.548	266.726	225.282	312.71	209.737	261.728	303.361	299.787	269.375	278.417	282.349	220.675	158.857	252.182	211.224	282.816	277.658	202.357	256.076	293.22	182.024	187.695	208.368	229.878	325.737	231.711	113.833	230.758	197.438	226.882
179	335.925	286.765	228.874	210.815	268.711	258.976	249.028	272.96	343.995	261.753	217.053	268.586	290.262	172.864	287.099	280.992	343.762	247.35	259.119	284.282	264.589	225.619	309.961	212.1	261.741	304.406	304.156	270.012	275.861	281.375	220.192	160.361	253.444	209.18	281.849	279.42	202.447	255.719	292.917	182.295	187.346	207.988	229.049	325.36	232.748	113.668	230.348	198.222	227.474
180	335.93	283.032	225.621	211.029	267.93	254.701	249.159	274.864	347.118	260.58	214.915	271.882	293.384	170.473	288.181	279.901	342.204	244.666	259.552	285.087	260.85	226.062	308.812	213.591	257.486	303.848	308.594	270.708	272.985	280.224	219.585	162.398	254.594	206.883	280.654	281.044	202.515	255.185	292.583	182.529	187.044	207.688	228.272	325.024	233.712	113.258	229.977	199.163	227.659
181	335.934	281.966	226.104	211.35	266.615	256.296	249.354	276.828	350.134	262.071	212.246	274.945	291.701	168.033	289.796	280.412	340.25	241.626	259.985	286.035	258.714	226.621	308.73	214.45	257.499	305.426	312.97	271.048	269.896	279.641	219.225	162.3	255.519	204.352	279.25	282.517	202.558	254.543	291.714	182.818	186.695	207.449	227.546	324.565	234.593	112.806	229.608	200.103	228.095
182	337.541	280.902	226.586	211.458	264.66	256.29	249.634	278.848	352.616	266.766	209.574	277.765	289.484	165.884	289.81	280.389	337.851	238.527	260.631	287.089	252.842	227.336	309.182	215.067	256.98	304.336	317.175	271.448	267.127	279.272	218.823	162.202	256.22	201.626	277.655	283.84	202.551	253.867	290.627	183.089	186.486	207.249	226.811	324.147	235.332	112.314	229.214	200.887	228.562
183	337.545	282.506	226.534	210.925	263.132	258.952	249.743	280.905	354.992	269.861	209.573	280.255	288.868	164.172	289.824	280.365	335.062	235.369	261.811	288.179	252.841	228.313	308.034	215.053	261.263	302.712	321.243	271.788	264.037	278.904	218.34	164.24	256.667	198.738	275.899	285.009	202.476	253.19	289.382	183.451	186.16	207.06	226.077	324.016	235.919	111.657	228.805	201.639	228.997
184	337.549	281.974	225.949	210.819	262.884	263.749	249.853	282.939	355.767	269.218	205.833	282.503	290.923	162.703	289.837	277.14	331.915	232.388	262.778	289.411	250.704	229.396	306.884	214.457	260.743	303.221	325.147	271.832	260.734	278.5	217.898	165.209	256.666	195.721	274.015	286.027	202.343	252.691	287.823	183.814	185.788	206.878	225.333	324.173	236.282	110.836	228.377	202.392	229.244
185	341.291	282.511	224.829	210.82	261.462	261.61	249.983	284.912	355.901	269.11	204.232	284.557	291.908	161.718	289.317	276.584	328.442	229.171	263.425	290.679	248.033	230.49	310.003	213.327	261.824	298.394	328.826	271.402	258.499	278.06	217.743	166.179	256.327	192.606	272.041	286.894	202.18	252.37	286.044	184.287	185.648	206.661	224.586	324.453	236.454	110.138	227.913	202.987	229.429
186	342.362	279.844	226.38	211.141	260.788	265.872	250.242	286.825	356.142	270.07	205.829	286.329	293.961	161.074	288.796	278.163	324.693	226.724	264.284	292.089	245.363	231.709	305.118	211.906	258.636	299.972	332.234	270.972	257.01	277.904	217.629	166.081	255.651	189.437	270.02	287.611	202.032	252.014	284.235	184.889	185.74	206.4	223.826	324.733	236.485	109.153	227.414	203.708	229.551
187	341.834	280.38	228.995	211.142	260.647	264.265	250.543	288.692	355.743	268.894	204.228	287.752	293.88	160.72	289.879	274.403	320.78	223.981	264.611	293.535	245.895	233.171	301.835	210.049	259.185	299.415	335.329	270.601	255.843	277.713	217.515	168.653	254.638	186.242	267.999	288.178	201.952	251.87	282.236	185.601	186.157	206.127	223.057	325.054	236.416	108.619	226.904	204.335	229.484
188	339.169	280.383	233.213	211.89	260.293	267.46	251.058	290.512	355.45	273.592	202.624	288.903	293.264	160.367	292.026	275.447	316.641	220.823	264.937	295.088	243.758	234.875	301.753	207.755	259.729	299.926	338.04	269.933	255.102	277.487	217.565	169.622	253.232	183.051	266.031	288.58	201.999	252.119	280.206	186.369	186.69	205.804	222.305	325.498	236.24	108.29	226.405	204.93	229.292
189	342.377	280.384	235.83	212.638	259.725	271.725	251.701	292.263	355.157	275.083	202.623	289.725	292.649	160.208	292.575	274.89	312.339	218.199	264.943	296.604	242.154	236.958	301.136	205.218	264.015	298.301	340.356	268.613	255.001	277.438	217.697	170.592	251.881	179.883	264.164	288.801	202.216	252.082	278.051	187.154	187.13	205.447	221.571	326.106	236.076	108.003	225.903	205.651	228.974
190	342.915	285.191	241.648	214.667	260.011	271.718	252.216	293.967	354.971	278.712	201.555	290.206	292.568	159.903	290.987	273.265	307.918	216.108	265.056	298.157	237.35	239.39	300.524	202.293	265.095	296.678	342.276	267.175	254.793	277.639	217.953	172.63	250.082	176.765	262.458	288.827	202.63	251.868	275.644	188.216	187.617	204.989	220.828	326.755	235.866	107.387	225.388	206.498	228.593
191	343.454	281.457	244.798	216.695	260.084	276.515	252.645	295.667	354.251	280.204	202.619	290.426	297.289	159.598	290.467	272.175	303.346	214.254	264.209	299.958	236.28	242.065	300.974	199.368	268.31	293.986	343.845	265.44	254.373	277.946	218.373	172.532	247.889	173.72	260.966	288.654	203.245	251.939	273.112	189.242	188.127	204.565	220.076	327.651	235.639	106.443	224.857	207.407	228.37
192	342.924	279.324	249.551	219.685	259.409	280.777	253.011	297.288	354.065	283.298	204.219	290.384	297.207	159.536	286.213	269.484	298.592	212.816	263.895	301.653	234.143	244.973	301.426	195.958	269.392	295.565	345.087	263.467	254.166	278.396	218.874	175.104	245.528	170.778	259.74	288.278	204.053	252.009	270.674	190.23	188.915	204.095	219.333	328.834	235.35	105.581	224.286	208.285	228.02
193	344.528	280.394	253.767	222.567	258.307	281.306	253.355	298.839	352.919	291.73	207.419	290.138	303.529	159.133	288.893	265.724	293.75	211.614	262.62	303.348	230.94	248.055	299.745	192.354	273.14	292.872	345.959	261.555	254.919	279.13	219.376	175.006	242.829	167.965	258.829	287.709	205.021	252.008	268.55	191.329	189.773	203.66	218.538	330.14	235.05	104.924	223.672	209.226	227.891
194	344.534	278.262	260.121	226.091	256.885	286.104	253.763	300.292	351.879	294.823	208.485	289.649	307.716	159.12	285.706	268.369	288.827	210.888	261.345	304.936	227.737	251.195	294.86	188.701	274.223	291.248	346.435	259.701	255.779	280.042	219.714	175.441	240.215	165.311	258.267	286.956	206.099	252.292	266.521	192.464	190.654	203.224	217.68	331.857	234.7	104.39	223.044	210.261	227.699
195	344.538	279.332	265.94	228.76	255.25	286.631	254.279	301.621	350.092	298.985	210.618	288.88	314.572	159.057	285.185	265.143	283.897	210.398	260.177	306.453	227.734	254.472	294.778	184.952	276.904	289.624	346.566	257.432	256.532	281.061	220.01	178.545	237.601	162.829	258.086	286.034	207.221	253.039	264.522	193.563	191.697	202.923	216.766	333.573	234.343	104.103	222.404	211.013	227.287
196	345.611	276.133	268.555	232.71	253.828	288.227	254.708	302.782	348.199	299.946	210.617	287.77	319.294	158.898	283.598	265.655	279.043	210.501	259.649	307.721	224.529	257.991	294.163	181.59	280.656	289.066	346.339	255.341	257.392	281.795	220.635	180.583	234.622	160.531	258.297	284.953	208.321	253.785	262.65	194.791	192.834	202.623	215.75	335.331	233.93	103.734	221.75	211.954	226.749
197	346.683	277.202	272.776	236.233	252.939	290.887	255.202	303.841	345.237	305.171	214.882	286.389	319.213	158.787	282.009	267.767	274.415	211.138	258.801	308.953	221.859	261.548	291.413	178.471	284.937	287.977	345.779	252.539	258.252	282.671	221.384	183.155	231.727	158.429	258.907	283.732	209.34	254.71	261.028	196	193.761	202.327	214.635	337.335	233.512	103.61	221.082	212.958	226.274
198	349.355	277.739	280.193	239.649	252.265	290.349	255.461	304.757	342.703	310.402	218.084	284.697	321.265	158.385	277.221	264.542	269.975	211.834	257.634	310.007	219.19	265.087	290.262	175.546	284.418	286.352	344.925	249.856	258.579	283.548	221.885	184.659	228.523	156.538	259.906	282.397	210.231	255.99	259.689	197.209	194.851	202.01	213.38	339.503	233.078	103.282	220.374	213.804	225.674
199	348.827	276.14	287.615	242.959	251.057	293.545	255.357	305.561	339.528	315.631	221.816	282.695	322.785	158.323	276.7	262.383	265.798	212.708	256.252	310.92	217.053	268.586	293.384	172.864	287.099	280.992	343.762	247.35	259.119	284.282	222.428	184.028	225.319	154.876	261.273	280.981	210.972	257.056	258.664	198.326	195.941	201.687	212.005	341.753	232.644	103.077	219.667	214.87	224.853
200	348.298	273.472	288.629	246.802	249.315	298.342	255.125	306.258	336.887	320.325	224.484	280.392	322.704	158.406	277.248	262.36	261.848	213.701	254.764	311.511	214.915	271.882	291.701	170.473	288.181	279.901	342.204	244.666	259.552	285.087	222.889	183.93	222.115	153.474	262.979	279.509	211.557	258.408	257.796	199.425	197.216	201.307	210.48	344.209	232.185	102.584	218.976	216.031	223.908
201	351.504	275.611	290.179	249.898	247.467	298.869	254.956	306.876	333.499	322.887	229.285	277.817	322.622	158.732	272.459	263.939	258.212	215.109	253.062	311.712	212.246	274.945	289.484	168.033	289.796	280.412	340.25	241.626	259.985	286.035	223.186	185.968	219.22	152.342	264.977	278.012	212.004	259.794	257.21	200.358	198.492	200.866	208.849	347.075	231.802	102.009	218.312	216.972	222.931
202	353.643	275.079	292.262	253.315	244.872	302.066	254.617	307.369	330.538	325.446	233.018	274.942	325.209	158.863	272.473	261.246	254.839	216.457	251.04	311.343	209.574	277.765	288.868	165.884	289.81	280.389	337.851	238.527	260.631	287.089	223.605	189.605	216.382	151.494	267.22	276.511	212.325	261.181	257.095	201.346	199.489	200.369	207.064	350.147	231.506	101.229	217.671	217.944	221.859
203	347.778	274.014	293.811	256.411	242.809	303.661	254.449	307.723	327.043	327.473	234.617	271.775	324.06	159.141	265.549	259.088	251.799	217.865	249.445	310.512	209.573	280.255	290.923	164.172	289.824	280.365	335.062	235.369	261.811	288.179	223.943	191.641	213.655	150.929	269.654	275.021	212.551	262.248	257.2	202.261	200.602	199.832	205.155	353.095	231.308	100.901	217.058	219.104	220.6
204	353.653	274.017	295.36	259.507	241.494	305.789	254.494	307.956	323.976	334.304	240.488	268.346	325.578	159.806	264.495	254.262	249.004	219.036	247.744	309.289	205.833	282.503	291.908	162.703	289.837	277.14	331.915	232.388	262.778	289.411	224.363	193.144	211.069	150.642	272.222	273.545	212.703	263.457	257.713	203.157	201.576	199.301	203.097	356.002	231.194	100.737	216.445	220.234	219.497
205	351.523	276.687	297.444	261.963	240.393	308.985	254.689	308.059	320.16	335.262	241.552	264.685	327.097	160.277	262.374	252.103	246.554	220.147	246.148	307.711	204.232	284.557	293.961	161.718	289.317	276.584	328.442	229.171	263.425	290.679	224.823	195.717	208.905	150.615	274.865	272.094	212.815	264.772	258.352	204.146	202.504	198.781	200.915	358.868	231.213	100.737	215.788	221.174	218.457
206	351.527	274.021	295.791	263.779	239.185	313.782	254.777	307.986	316.452	334.087	243.151	260.703	329.685	160.749	259.186	253.148	244.444	221.555	244.873	305.634	205.829	286.329	293.88	161.074	288.796	278.163	324.693	226.724	264.284	292.089	225.407	200.422	206.852	150.858	277.527	270.679	212.918	266.124	259.524	205.171	203.269	198.301	198.601	362.145	231.278	100.532	215.132	222.021	216.946
207	350.998	274.557	296.806	265.06	238.83	318.045	254.716	307.75	312.53	332.911	246.885	256.411	331.205	161.123	258.132	255.26	242.641	223.022	243.599	303.309	204.228	287.752	293.264	160.72	289.879	274.403	320.78	223.981	264.611	293.535	225.95	204.593	204.912	151.37	280.155	269.303	213.057	267.44	260.948	206.104	204.15	197.888	196.235	364.847	231.377	100.285	214.494	222.836	215.247
208	353.137	274.558	294.62	266.662	238.797	319.64	254.462	307.404	309.036	333.337	254.887	251.875	330.056	161.449	256.543	255.237	241.165	224.43	242.004	301.09	202.624	288.903	292.649	160.367	292.026	275.447	316.641	220.823	264.937	295.088	226.657	206.097	203.422	152.144	282.702	267.972	213.259	269.004	262.623	207.093	204.892	197.531	193.848	367.672	231.51	100.244	213.863	223.745	213.297
209	352.608	274.561	290.834	267.73	238.336	323.37	253.91	306.917	305.647	334.296	256.489	247.137	328.372	161.774	251.755	254.146	240.127	225.957	240.302	298.978	202.623	289.725	292.568	160.208	292.575	274.89	312.339	218.199	264.943	296.604	227.2	208.669	202.24	153.174	285.118	266.692	213.545	270.426	264.486	208.173	205.587	197.247	191.44	370.169	231.718	100.367	213.239	224.592	211.535
210	352.079	272.963	292.918	268.478	237.768	326.033	252.824	306.264	302.686	332.586	258.62	242.243	326.69	161.761	246.43	258.391	239.43	227.068	238.601	296.581	201.555	290.206	297.289	159.903	290.987	273.265	307.918	216.108	265.056	298.157	227.702	212.839	201.255	154.453	287.367	265.46	213.919	271.813	266.474	209.143	206.05	196.952	189.002	372.583	231.985	100.45	212.679	225.376	209.647
211	352.085	271.899	291.263	268.692	237.627	331.363	251.439	305.425	300.259	328.744	258.619	237.203	320.204	161.892	248.046	257.835	238.989	227.883	236.579	293.899	202.619	290.426	297.207	159.598	290.467	272.175	303.346	214.254	264.209	299.958	228.368	213.81	200.355	155.963	289.413	264.26	214.362	273.271	268.4	210.242	206.258	196.69	186.546	374.67	232.381	100.655	212.133	226.254	207.791
212	353.156	274.036	289.077	268.479	237.913	331.891	249.862	304.428	298.045	324.367	258.616	232.106	320.121	162.364	247.527	257.811	238.781	229.172	234.77	291.182	204.219	290.384	303.529	159.536	286.213	269.484	298.592	212.816	263.895	301.653	229.035	216.916	199.791	157.686	291.229	263.081	214.842	274.836	270.483	211.193	206.281	196.446	184.108	376.879	232.94	100.614	211.566	227.352	205.778
213	354.227	271.903	286.357	267.199	237.345	335.086	247.794	303.246	296.898	323.191	260.749	226.989	320.575	163.029	243.805	254.587	238.818	229.987	234.029	288.358	207.419	290.138	307.716	159.133	288.893	265.724	293.75	211.614	262.62	303.348	229.619	218.418	199.817	159.591	292.799	261.903	215.327	276.045	272.566	212.145	206.118	196.195	181.691	378.555	233.686	100.737	210.992	228.355	203.985
214	351.03	271.372	287.373	265.919	236.991	336.682	245.469	301.878	296.071	319.347	260.747	221.833	322.094	163.452	242.752	260.434	238.967	231.158	234.249	285.428	208.485	289.649	314.572	159.12	285.706	268.369	288.827	210.888	261.345	304.936	230.326	221.523	200.068	161.669	294.102	260.709	215.78	277.361	274.523	212.857	206.094	195.844	179.351	379.491	234.598	100.614	210.435	229.296	202.191
215	352.102	271.909	284.652	264.746	237.277	338.81	242.996	300.371	295.779	314.437	261.28	216.657	320.411	163.875	242.765	263.079	239.305	232.091	234.148	282.355	210.618	288.88	319.294	159.057	285.185	265.143	283.897	210.398	260.177	306.453	230.827	225.694	200.712	163.909	295.131	259.483	216.154	278.32	276.575	213.441	205.884	195.498	177.11	379.894	235.685	100.614	209.846	230.331	200.586
216	352.64	272.444	284.067	263.359	237.669	337.203	240.202	298.743	295.273	309.525	265.547	211.608	321.397	164.2	242.245	266.258	239.857	232.668	234.794	279.033	210.617	287.77	319.213	158.898	283.598	265.655	279.043	210.501	259.649	307.721	231.37	226.665	201.862	166.283	295.887	258.212	216.422	279.209	278.218	213.895	205.512	195.158	175	380.051	236.964	100.449	209.255	231.429	199.17
217	353.713	271.379	281.88	261.332	238.489	338.264	237.002	296.995	295.087	306.748	261.276	206.792	314.377	165.254	241.192	268.904	240.647	233.127	236.188	276.174	214.882	286.389	321.265	158.787	282.009	267.767	274.415	211.138	258.801	308.953	231.708	229.235	203.237	168.766	296.366	256.878	216.567	280.276	279.955	214.405	205.001	194.841	173.002	379.921	238.428	100.326	208.723	232.463	197.879
218	355.854	269.246	278.093	259.838	239.949	338.258	233.696	295.172	294.367	297.568	260.206	202.247	313.228	166.21	238.003	273.149	241.582	233.171	237.796	273.35	218.084	284.697	322.785	158.385	277.221	264.542	269.975	211.834	257.634	310.007	231.84	229.139	204.892	171.347	296.575	255.465	216.583	281.271	281.724	214.86	204.374	194.523	171.183	379.174	240.055	100.121	208.241	233.498	196.525
219	357.459	268.715	276.44	257.705	242.37	338.251	230.197	293.275	294.075	296.392	258.071	198.013	305.673	167.312	238.016	275.261	242.704	233.215	238.976	270.847	221.816	282.695	322.704	158.323	276.7	262.383	265.798	212.708	256.252	310.92	231.685	233.311	206.941	173.986	296.525	253.954	216.477	282.267	283.399	215.149	203.724	194.267	169.577	377.524	241.918	100.08	207.794	234.816	195.234
220	357.996	270.853	273.721	254.61	245.112	338.78	226.613	291.299	293.889	293.616	255.4	194.167	303.459	168.851	239.631	277.905	243.928	233.437	240.37	268.699	224.484	280.392	322.622	158.406	277.248	262.36	261.848	213.701	254.764	311.511	231.695	233.213	209.13	176.647	296.231	252.324	216.282	283.084	284.76	215.567	203.236	194.073	168.147	375.793	243.956	100.326	207.394	235.976	194.257
221	358	268.185	272.602	252.476	248.28	337.707	223.136	289.3	294.45	289.771	254.331	190.787	299.641	170.632	236.443	278.951	245.233	233.066	241.871	266.907	229.285	277.817	325.209	158.732	272.459	263.939	258.212	215.109	253.062	311.712	231.786	232.581	211.656	179.307	295.707	250.561	216.012	283.76	285.838	216.04	202.794	193.935	166.955	373.568	246.104	100.285	207.041	237.105	193.374
222	359.072	266.054	270.414	250.449	250.594	339.302	220.064	287.259	295.438	287.529	252.194	187.882	296.889	172.171	238.058	282.13	246.594	233.11	243.478	265.151	233.018	274.942	324.06	158.863	272.473	261.246	254.839	216.457	251.04	311.343	231.754	231.417	214.379	181.944	294.974	248.665	215.672	284.577	286.665	216.439	202.074	193.831	166.033	371.508	248.409	100.203	206.701	238.486	192.366
223	359.611	268.191	268.228	247.674	252.802	336.094	217.27	285.171	296.533	282.084	250.056	185.404	298.944	173.661	242.342	284.774	247.993	232.917	244.552	263.536	234.617	271.775	325.578	159.141	265.549	259.088	251.799	217.865	249.445	310.512	231.64	231.852	217.298	184.532	294.048	246.625	215.259	285.288	286.99	217.004	201.285	193.722	165.375	368.791	250.885	100.203	206.374	240.117	191.797
224	359.082	268.727	267.642	245.007	254.048	333.953	214.732	283.042	297.841	280.374	243.651	183.451	300.463	174.618	240.755	290.089	249.455	232.665	247.12	262.029	240.488	268.346	327.097	159.806	264.495	254.262	249.004	219.036	247.744	309.289	231.485	228.553	220.442	187.052	292.947	244.437	214.771	285.999	287.095	217.588	200.402	193.595	164.969	365.663	253.417	100.285	206.054	241.686	191.447
225	357.487	266.594	265.455	243.193	255.722	332.346	212.429	280.918	299.043	279.734	244.715	182.03	298.247	175.865	237.566	291.665	250.98	232.887	250.434	260.629	241.552	264.685	329.685	160.277	262.374	252.103	246.554	220.147	246.148	307.711	230.96	226.855	223.867	189.487	291.688	242.101	214.189	286.354	287.106	218.116	199.705	193.418	164.922	362.002	256.084	100.326	205.737	243.16	191.13
226	359.091	266.063	266.472	241.06	257.182	330.738	210.297	278.817	300.351	275.354	242.046	181.027	296.563	177.064	237.579	293.779	252.486	233.168	254.07	259.299	243.151	260.703	331.205	160.749	259.186	253.148	244.444	221.555	244.873	305.634	230.805	226.224	227.798	191.823	290.283	239.619	213.509	286.638	287.211	218.81	198.939	193.184	165.173	358.546	258.89	100.326	205.401	244.792	190.906
227	359.629	266.065	263.751	238.819	258.963	328.598	208.101	276.753	301.553	273.112	238.842	180.451	295.415	178.603	238.661	299.092	253.998	233.627	257.918	257.934	246.885	256.411	330.056	161.123	258.132	255.26	242.641	223.022	243.599	303.309	230.239	225.592	231.841	194.055	288.752	236.981	212.749	286.495	287.033	219.486	198.219	192.867	165.741	354.926	261.764	100.696	205.074	246.486	190.619
228	359.101	263.934	264.234	237.006	261.17	326.99	205.99	274.74	303.182	275.139	237.239	180.322	292.665	179.656	241.344	298	255.573	234.145	262.514	256.854	254.887	251.875	328.372	161.449	256.543	255.237	241.165	224.43	242.004	301.09	229.673	224.426	235.744	196.185	287.108	234.197	211.922	286.458	286.856	220.474	197.406	192.532	166.573	351.47	264.656	100.942	204.802	247.96	190.145
229	359.106	266.603	262.046	235.512	264.338	318.979	203.943	272.843	304.17	276.098	235.101	180.59	289.383	180.856	239.222	303.315	257.185	235.079	266.362	255.845	256.489	247.137	326.69	161.774	251.755	254.146	240.127	225.957	240.302	298.978	228.944	222.728	239.758	198.217	285.366	231.281	211.034	286.458	286.71	221.554	196.895	192.153	167.679	348.096	267.557	101.435	204.593	249.403	189.858
230	360.177	264.47	261.995	233.698	267.399	321.106	202.046	271.067	305.478	275.991	232.433	181.256	289.3	182.152	241.903	308.628	258.804	236.308	270.211	255.12	258.62	242.243	320.204	161.761	246.43	258.391	239.43	227.068	238.601	296.581	228.049	224.231	244.054	200.149	283.551	228.249	210.1	286.528	286.438	222.708	196.337	191.745	168.972	345.009	270.398	101.927	204.425	250.721	189.572
231	359.114	263.941	261.409	231.884	270.46	320.568	200.298	269.411	306.892	274.283	229.229	182.242	287.616	183.157	241.385	309.675	260.448	237.657	274.273	254.965	258.619	237.203	320.121	161.892	248.046	257.835	238.989	227.883	236.579	293.899	227.361	222.534	247.985	201.963	281.678	225.112	209.132	286.527	286.198	223.862	195.873	191.287	170.462	342.374	273.142	102.092	204.305	252.007	189.003
232	357.519	263.409	257.088	231.244	273.948	313.624	198.935	267.918	308.521	271.505	228.158	183.452	287.534	184.065	241.4	308.583	262.067	239.065	277.588	254.845	258.616	232.106	320.575	162.364	247.527	257.811	238.781	229.172	234.77	291.182	226.754	219.768	251.494	203.647	279.768	221.9	208.116	286.171	285.926	225.127	195.315	190.818	172.118	339.822	275.748	102.502	204.239	253.167	188.34
233	357.523	261.81	255.435	230.071	276.69	310.415	197.827	266.615	310.15	272.999	228.156	184.875	288.521	185.361	244.08	308.559	263.617	241.125	280.583	255.152	260.749	226.989	322.094	163.029	243.805	254.587	238.818	229.987	234.029	288.358	225.901	218.069	254.919	205.189	277.836	218.635	207.023	285.921	285.654	226.52	194.85	190.338	173.966	337.597	278.2	102.585	204.236	254.108	187.457
234	360.73	260.745	254.851	228.791	279.431	305.073	197.126	265.544	312.205	270.754	226.02	186.492	291.641	186.706	244.628	312.271	265.079	242.948	284.004	255.459	260.747	221.833	320.411	163.452	242.752	260.434	238.967	231.158	234.249	285.428	224.884	218.506	257.951	206.578	275.901	215.336	205.813	285.493	285.32	228.097	194.432	189.84	176.003	335.742	280.45	102.995	204.239	255.049	186.574
235	360.734	258.613	256.934	227.724	281.531	304.531	196.744	264.677	313.834	272.248	223.35	188.187	291.558	188.632	241.44	313.316	266.503	245.126	287.319	255.838	261.28	216.657	321.397	163.875	242.765	263.079	239.305	232.091	234.148	282.355	224.195	218.408	260.674	207.823	273.979	212.025	204.416	284.852	284.829	229.656	194.176	189.32	178.282	333.887	282.443	103.529	204.261	256.115	185.691
236	360.205	257.549	256.348	226.337	283.952	302.391	196.746	264.029	316.103	273.209	220.145	190.047	292.545	190.171	243.587	311.692	267.921	247.483	289.994	256.216	265.547	211.608	314.377	164.2	242.245	266.258	239.857	232.668	234.794	279.033	223.465	216.175	263.059	208.95	272.08	208.727	202.74	284.175	284.306	231.325	194.106	188.806	180.776	332.566	284.108	103.939	204.31	256.962	184.651
237	360.209	260.218	258.432	225.271	286.053	300.784	197.048	263.612	318.372	276.301	218.009	192.159	291.93	191.564	241.999	312.736	269.339	249.899	292.989	256.488	261.276	206.792	313.228	165.254	241.192	268.904	240.647	233.127	236.188	276.174	222.9	219.28	265.052	209.98	270.222	205.461	200.71	283.285	284.003	233.16	193.896	188.297	183.448	331.737	285.461	104.144	204.37	257.683	183.548
238	360.749	256.485	258.38	224.631	289.542	297.043	197.776	263.395	320.214	279.931	213.738	194.465	292.381	192.472	243.614	309.512	270.757	252.374	295.877	256.688	260.206	202.247	305.673	166.21	238.003	273.149	241.582	233.171	237.796	273.35	222.663	219.717	266.623	210.918	268.411	202.249	198.274	282.359	283.794	234.977	193.64	187.75	186.261	331.155	286.442	105.007	204.383	258.372	182.132
239	359.684	255.421	257.261	223.138	292.71	295.969	198.803	263.35	321.736	280.356	214.803	196.849	291.233	193.574	244.162	308.954	272.138	254.79	298.018	256.96	258.071	198.013	303.459	167.312	238.016	275.261	242.704	233.215	238.976	270.847	222.056	219.62	267.941	211.776	266.658	199.106	195.418	281.398	283.93	236.977	193.431	187.179	189.169	330.983	287.091	105.828	204.435	258.905	180.747
240	360.757	257.024	255.608	221.43	296.518	292.761	200.065	263.485	323.578	283.45	211.065	199.339	290.085	195.016	243.109	308.398	273.493	257.384	299.945	257.517	255.4	194.167	299.641	168.851	239.631	277.905	243.928	233.437	240.37	268.699	221.86	218.454	268.895	212.555	264.975	196.048	192.179	280.401	284.067	238.959	193.291	186.592	192.144	331.345	287.43	106.813	204.549	259.061	179.393
241	360.228	253.824	256.089	220.044	300.54	290.62	201.391	263.756	325.313	287.611	208.929	201.965	291.069	195.827	242.589	309.443	274.779	260.096	302.086	258.322	254.331	190.787	296.889	170.632	236.443	278.951	245.233	233.066	241.871	266.907	221.705	216.222	269.679	213.247	263.364	193.079	188.646	279.333	284.486	241.107	193.012	185.993	195.163	332.076	287.456	107.839	204.713	259.185	177.913
242	359.698	254.893	256.037	217.376	304.348	287.411	202.589	264.161	326.942	287.502	209.459	204.766	292.055	196.346	243.669	308.885	275.959	262.512	304.013	259.198	252.194	187.882	298.944	172.171	238.058	282.13	246.594	233.11	243.478	265.151	221.92	216.657	269.958	213.857	261.831	190.209	184.938	278.692	285.03	243.292	192.709	185.445	198.228	333.136	287.134	108.742	204.945	259.216	176.528
243	359.17	252.76	254.918	214.602	307.837	287.94	203.595	264.681	329.104	291.131	207.324	207.713	294.643	196.624	242.617	308.861	277.031	265.165	305.834	259.933	250.056	185.404	300.463	173.661	242.342	284.774	247.993	232.917	244.552	263.536	222.381	215.492	269.619	214.412	260.366	187.439	181.165	277.979	285.386	245.697	192.407	184.931	201.289	334.319	286.507	110.138	205.316	258.964	174.641
244	357.574	251.161	255.934	212.681	311.004	287.933	204.323	265.253	331.373	293.159	207.321	210.882	294.026	196.367	245.298	309.372	278.029	267.818	307.228	260.774	243.651	183.451	298.247	174.618	240.755	290.089	249.455	232.665	247.12	262.029	222.677	216.461	269	214.936	258.968	184.776	177.434	276.983	285.994	248.25	192.128	184.451	204.328	335.707	285.556	112.067	205.783	258.68	173.036
245	357.045	250.631	253.748	210.334	313.318	287.394	204.838	265.867	332.895	291.447	208.387	214.314	297.68	195.771	246.381	308.816	278.913	270.531	308.088	261.935	244.715	182.03	296.563	175.865	237.566	291.665	250.98	232.887	250.434	260.629	223.302	216.899	267.65	215.447	257.629	182.223	173.82	275.772	286.538	250.839	192.104	184.021	207.372	337.547	284.262	113.504	206.312	258.334	171.588
246	356.515	250.1	251.027	207.346	314.885	285.253	205.375	266.518	333.669	297.211	207.319	218.037	295.463	195.03	245.859	310.392	279.728	273.184	308.735	263.025	242.046	181.027	295.415	177.064	237.579	293.779	252.486	233.168	254.07	259.299	223.927	218.937	265.457	215.957	256.335	179.802	170.349	274.597	287.24	253.3	192.057	183.669	210.382	339.757	282.67	115.187	206.927	257.956	170.297
247	357.055	250.637	250.441	203.824	316.239	284.713	206.189	267.146	334.23	302.44	210.519	221.953	293.247	194.385	249.075	308.769	280.493	275.778	308.314	264.115	238.842	180.451	292.665	178.603	238.661	299.092	253.998	233.627	257.918	257.934	224.798	216.704	261.86	216.467	255.079	177.519	167.002	273.458	288.098	255.907	192.033	183.324	213.315	342.171	280.821	116.624	207.59	257.515	168.88
248	357.059	249.037	248.257	200.516	317.165	286.843	207.088	267.736	334.578	302.332	211.05	226.142	295.299	193.838	252.825	307.144	281.246	278.491	307.679	264.813	237.239	180.322	289.383	179.656	241.344	298	255.573	234.145	262.514	256.854	225.382	216.072	258.796	216.958	253.852	175.387	163.774	272.354	288.956	258.515	191.87	183.062	216.188	345.079	278.717	118.225	208.241	256.981	167.652
249	356.528	246.905	248.205	196.568	318.092	284.7	208.158	268.252	335.033	303.825	211.048	230.622	294.684	193.582	253.374	309.256	281.954	280.906	307.045	265.583	235.101	180.59	289.3	180.856	239.222	303.315	257.185	235.079	266.362	255.845	226.131	215.974	255.564	217.421	252.65	173.41	160.648	271.179	289.878	261.031	191.591	182.88	219.006	347.863	276.394	119.909	208.921	256.446	166.675
250	355.467	245.838	242.816	193.046	319.019	284.161	209.484	268.652	335.914	306.385	211.581	235.392	299.94	192.84	257.121	309.766	282.656	283.204	306.517	266.246	232.433	181.256	287.616	182.152	241.903	308.628	258.804	236.308	270.211	255.12	226.92	216.945	252.304	217.862	251.47	171.594	157.617	270.325	291.019	263.565	191.497	182.759	221.661	350.811	273.88	121.797	209.651	255.848	165.792
251	357.072	247.443	241.696	189.418	319.625	284.688	210.746	268.895	337.223	308.946	213.179	240.415	300.392	191.759	258.736	308.142	283.315	285.204	304.815	266.838	229.229	182.242	287.534	183.157	241.385	309.675	260.448	237.657	274.273	254.965	227.422	221.118	249.212	218.308	250.31	169.929	154.706	269.541	292.128	265.934	191.52	182.638	224.167	353.923	271.203	123.398	210.425	255.282	165.003
252	354.408	246.378	237.909	186.75	320.765	286.284	211.624	268.947	338.425	312.041	217.448	245.613	301.379	191.017	257.684	308.653	283.923	286.731	303.434	267.75	228.158	183.452	288.521	184.065	241.4	308.583	262.067	239.065	277.588	254.845	228.129	219.953	245.896	218.782	249.178	168.389	151.962	268.829	293.269	268.192	191.334	182.567	226.485	357.077	268.365	125.204	211.276	254.59	164.309
253	353.879	246.914	238.924	184.296	321.372	284.142	212.374	268.776	339.733	308.195	220.646	250.879	300.764	190.13	259.832	308.63	284.437	288.02	302.159	268.733	228.156	184.875	291.641	185.361	244.08	308.559	263.617	241.125	280.583	255.152	228.836	221.988	242.72	219.323	248.071	166.963	149.41	267.938	294.222	270.469	191.171	182.53	228.615	360.148	265.431	127.011	212.205	253.679	163.739
254	349.613	245.848	238.872	182.589	322.298	285.737	213.102	268.388	341.255	303.819	225.982	256.241	301.749	189.534	260.381	308.606	284.863	289.368	300.778	269.645	226.02	186.492	291.558	186.706	244.628	312.271	265.079	242.948	284.004	255.459	229.461	222.959	239.544	219.959	246.994	165.651	147.051	266.942	295.332	272.635	190.984	182.527	230.481	363.302	262.428	129.064	213.183	252.799	163.39
255	350.151	244.25	239.355	180.668	323.011	286.265	213.638	267.795	342.99	299.975	228.648	261.662	303.802	188.792	262.527	309.65	285.138	290.836	298.97	270.415	223.35	188.187	292.545	188.632	241.44	313.316	266.503	245.126	287.319	255.838	229.716	223.396	236.565	220.701	245.947	164.449	144.88	265.945	296.19	274.507	190.891	182.524	232.15	366.414	259.364	131.116	214.23	251.793	163.292
256	352.825	244.787	239.303	178.961	323.298	287.326	214.303	267.007	343.978	300.933	234.516	267.034	305.856	188.196	262.541	310.161	285.269	291.828	297.909	271.078	220.145	190.047	291.93	190.171	243.587	311.692	267.921	247.483	289.994	256.216	230.259	225.432	233.586	221.548	244.925	163.363	142.889	265.019	296.735	276.286	190.844	182.51	233.619	369.363	256.239	132.881	215.314	250.756	163.414
257	350.695	245.324	239.251	176.934	322.729	287.321	215.394	266.02	344.539	302.427	239.319	272.261	304.705	187.503	264.155	309.603	285.243	292.584	296.634	271.563	218.009	192.159	292.381	191.564	241.999	312.736	269.339	249.899	292.989	256.488	230.925	227.469	230.775	222.51	243.926	162.415	141.07	263.559	297.436	277.771	190.889	182.479	234.912	372.065	253.101	134.606	216.439	249.594	163.818
258	351.767	245.325	238.665	174.8	322.589	290.515	216.699	264.87	344.674	299.115	244.12	277.333	307.824	186.713	263.103	308.514	285.103	293.162	294.398	272.226	213.738	194.465	291.233	192.472	243.614	309.512	270.757	252.374	295.877	256.688	231.55	224.171	227.964	223.585	242.936	161.612	139.445	262.171	297.855	279.091	190.912	182.459	235.979	375.054	249.903	136.535	217.594	248.4	164.505
259	348.57	244.794	236.479	172.026	322.021	293.714	218.047	263.572	344.702	295.807	246.786	282.035	310.413	185.923	261.514	310.09	284.858	293.562	291.63	272.924	214.803	196.849	290.085	193.574	244.162	308.954	272.138	254.79	298.018	256.96	232.586	225.674	225.294	224.783	241.953	160.956	138.091	261.067	298.243	280.245	190.888	182.49	236.841	377.633	246.669	138.424	218.742	247.457	165.129
260	350.174	243.196	235.895	169.466	321.026	292.104	219.522	262.106	345.049	294.098	248.385	286.253	310.864	184.793	262.596	312.204	284.555	293.843	289.607	273.409	211.065	199.339	291.069	195.016	243.109	308.398	273.493	257.384	299.945	257.517	233.457	225.577	222.54	226.118	240.963	160.457	137.095	260.213	298.505	281.252	190.91	182.599	237.409	380.129	243.436	140.394	219.875	246.483	166.255
261	351.781	242.13	234.775	167.225	320.778	292.633	220.955	260.483	345.61	290.788	253.187	289.946	310.782	183.954	261.543	306.843	284.272	294.48	287.692	273.717	208.929	201.965	292.055	195.827	242.589	309.443	274.779	260.096	302.086	258.322	234.411	226.013	220.038	227.589	239.962	160.15	136.539	259.5	298.61	282.019	190.979	182.782	237.682	382.092	240.237	142.364	220.998	245.508	167.319
262	351.25	242.666	233.656	165.091	320.744	296.362	222.217	258.748	345.958	292.815	257.454	293.106	311.77	182.97	260.49	304.15	284.013	294.939	286.204	274.166	209.459	204.766	294.643	196.346	243.669	308.885	275.959	262.512	304.013	259.198	235.077	224.314	217.958	229.184	238.944	160.059	136.498	258.93	298.589	282.455	191.095	183.048	237.596	384.014	237.062	144.458	222.085	244.597	168.57
263	351.79	243.202	232.003	162.85	320.069	299.559	223.394	256.916	346.519	288.971	262.79	295.664	313.822	181.84	257.835	304.127	283.73	294.924	285.249	274.367	207.324	207.713	294.026	196.624	242.617	308.861	277.031	265.165	305.834	259.933	235.456	224.749	216.046	230.894	237.897	160.225	137.035	258.36	298.349	282.45	191.047	183.41	237.186	385.649	233.914	146.306	223.108	243.654	169.759
264	350.727	244.272	233.018	160.609	319.181	301.687	224.656	255.052	346.653	282.991	263.854	297.679	317.475	180.759	255.712	305.704	283.446	294.79	284.828	274.389	207.321	210.882	297.68	196.367	245.298	309.372	278.029	267.818	307.228	260.774	236.163	221.983	214.387	232.698	236.817	160.661	138.174	258.075	297.889	282.353	191.209	183.795	236.456	387.12	230.79	148.112	224.058	242.774	171.262
265	350.732	243.207	230.299	158.689	319.04	298.479	225.94	253.183	346.253	282.351	265.454	299.034	322.197	179.823	249.323	298.211	283.119	294.597	283.981	274.269	208.387	214.314	295.463	195.771	246.381	308.816	278.913	270.531	308.088	261.935	236.664	216.016	213.317	234.579	235.686	161.357	139.923	257.968	297.46	282.053	191.44	184.202	235.452	388.385	227.72	149.754	224.994	241.8	172.577
266	351.803	244.81	231.314	157.088	318.793	300.075	227.33	251.355	345.747	283.309	270.788	299.749	323.716	179.179	246.134	294.452	282.722	294.107	283.24	274.15	207.319	218.037	293.247	195.03	245.859	310.392	279.728	273.184	308.735	263.025	237.454	217.519	213.793	236.532	234.493	162.279	142.28	257.647	297.125	281.44	191.625	184.649	234.184	389.608	224.696	151.191	225.903	241.077	173.766
267	351.274	244.813	227.526	155.808	318.439	303.804	229.019	249.63	346.095	288.004	271.321	299.813	328.439	178.437	239.745	290.161	282.276	293.795	282.606	273.959	210.519	221.953	295.299	194.385	249.075	308.769	280.493	275.778	308.314	264.115	237.914	216.889	213.847	238.55	233.224	163.407	145.233	257.646	296.634	280.699	191.764	185.067	232.71	390.586	221.72	152.34	226.765	240.447	175.143
268	353.948	242.68	230.144	154.848	318.084	304.331	231.242	248.021	345.909	286.829	274.52	299.247	329.959	177.89	235.487	286.933	281.823	293.246	282.185	273.626	211.05	226.142	294.684	193.838	252.825	307.144	281.246	278.491	307.679	264.813	238.457	210.386	213.902	240.631	231.862	164.702	148.745	258.179	296.048	279.626	191.925	185.423	231.045	391.482	218.796	153.449	227.584	239.693	176.678
269	356.088	242.149	232.759	154.102	317.41	305.393	233.87	246.523	345.937	285.652	277.721	298.002	333.079	177.245	236.035	287.444	281.357	292.697	281.978	273.15	211.048	230.622	299.94	193.582	253.374	309.256	281.954	280.906	307.045	265.583	238.753	208.687	214.096	242.769	230.4	166.135	152.753	258.961	295.368	278.406	192.157	185.74	229.166	391.967	215.929	154.475	228.387	239.221	178.463
270	353.423	243.219	235.377	153.142	316.415	304.319	237.117	245.183	345.751	283.412	279.854	296.184	337.265	176.406	231.247	281.552	280.917	291.851	281.877	272.497	211.581	235.392	300.392	192.84	257.121	309.766	282.656	283.204	306.517	266.246	238.68	207.522	214.207	244.941	228.829	167.692	157.163	260.348	294.877	276.983	192.365	186.024	227.044	392.575	213.101	155.296	229.08	238.686	180.531
271	351.826	242.153	233.191	151.328	314.673	307.513	241.005	243.973	345.458	287.038	284.656	293.764	343.589	175.568	227.525	279.927	280.52	290.827	281.349	271.808	213.179	240.415	301.379	191.759	258.736	308.142	283.315	285.204	304.815	266.838	238.607	205.291	214.739	247.117	227.144	169.34	161.852	262.019	293.977	275.377	192.596	186.262	224.674	392.691	210.33	155.953	229.686	238.245	182.411
272	352.899	240.021	233.139	150.048	312.184	309.643	245.149	242.851	344.738	290.666	286.79	290.831	348.31	174.729	223.269	275.1	280.249	289.745	280.501	271.226	217.448	245.613	300.764	191.017	257.684	308.653	283.923	286.731	303.434	267.75	238.288	200.924	215.495	249.274	225.347	171.016	166.654	264.296	293.266	273.494	192.897	186.495	222.035	392.889	207.609	156.733	230.214	238.056	184.448
273	353.971	241.091	235.755	149.515	310.122	310.703	249.378	241.887	343.912	291.627	284.652	287.412	349.83	173.842	218.478	274.544	280.129	288.128	279.76	270.501	220.646	250.879	301.749	190.13	259.832	308.63	284.437	288.02	302.159	268.733	237.804	194.422	216.505	251.375	223.437	172.67	171.392	266.785	292.524	271.428	193.128	186.717	219.119	392.922	204.997	157.308	230.641	237.992	186.516
274	353.976	241.092	236.771	150.263	308.486	308.564	253.821	241.094	342.979	289.383	287.852	283.595	352.95	173.1	217.426	269.182	280.172	286.452	279.233	269.812	225.982	256.241	303.802	189.534	260.381	308.606	284.863	289.368	300.778	269.645	237.485	193.79	217.598	253.383	221.419	174.27	175.908	269.595	291.593	269.214	193.476	186.944	215.938	392.997	202.523	157.595	230.923	238.085	188.741
275	354.513	239.494	238.321	151.332	306.211	311.761	258.156	240.483	341.832	286.073	292.119	279.458	354.471	172.553	217.439	261.689	280.391	284.48	278.812	269.23	228.648	261.662	305.856	188.792	262.527	309.65	285.138	290.836	298.97	270.415	237.289	193.159	219.085	255.262	219.291	175.787	180.082	272.69	290.787	266.982	193.754	187.189	212.565	393.071	200.185	157.431	231.091	238.304	190.715
276	354.519	239.497	239.336	153.467	303.509	312.287	262.215	240.099	340.793	288.099	291.05	275.137	356.523	171.859	216.386	257.929	280.836	282.389	279.139	268.541	234.516	267.034	304.705	188.196	262.541	310.161	285.269	291.828	297.909	271.078	237.216	188.792	220.628	256.987	217.056	177.203	183.838	276.034	290.045	264.566	194.054	187.483	209.016	393.022	197.956	157.513	231.166	238.46	193.034
277	354.523	240.567	245.155	155.816	301.126	312.816	266.252	239.975	340.5	289.059	289.447	270.611	360.175	171.021	212.663	254.171	281.45	280.18	280.318	267.639	239.319	272.261	307.824	187.503	264.155	309.603	285.243	292.584	296.634	271.563	236.691	186.559	222.368	258.529	214.704	178.522	187.171	279.769	289.49	262.021	194.286	187.744	205.37	393.056	195.882	157.554	231.143	239.024	195.165
278	355.595	238.434	242.969	158.059	298.317	312.274	270.204	240.045	340.314	290.019	288.911	265.912	364.899	170.473	211.609	250.945	282.165	277.615	281.925	266.985	244.12	277.333	310.413	186.713	263.103	308.514	285.103	293.162	294.398	272.226	236.331	184.861	224.136	259.864	212.239	179.746	190.115	283.611	289.03	259.328	194.517	187.927	201.643	392.679	193.913	157.513	231.045	239.682	197.076
279	356.667	237.37	245.052	159.554	294.868	312.803	273.964	240.311	340.128	288.31	292.111	261.076	366.952	169.441	205.218	249.319	282.993	275.109	283.853	266.652	246.786	282.035	310.864	185.923	261.514	310.09	284.858	293.562	291.63	272.924	235.519	184.23	226.156	260.977	209.656	180.862	192.713	287.381	288.57	256.562	194.748	188.014	197.928	392.548	191.988	157.431	230.928	240.686	198.799
280	355.604	237.904	243.931	161.903	291.525	311.729	277.617	240.757	340.689	286.6	292.11	256.221	368.469	168.699	202.564	242.36	283.958	272.841	285.567	266.283	248.385	286.253	310.782	184.793	262.596	312.204	284.555	293.843	289.607	273.409	235.2	181.465	228.317	261.862	206.957	181.873	194.991	291.294	288.11	253.797	194.98	187.966	194.213	392.089	190.11	157.513	230.777	241.815	200.616
281	358.811	240.577	248.151	164.145	287.968	311.19	281.184	241.403	341.464	284.357	289.973	251.356	370.523	168.2	203.113	237.532	285.012	270.275	286.853	265.95	253.187	289.946	311.77	183.954	261.543	306.843	284.272	294.48	287.692	273.717	235.168	176.564	230.225	262.523	204.145	182.771	196.949	295.563	287.619	250.92	195.211	187.749	190.524	391.548	188.283	157.349	230.581	243.133	202.182
282	357.749	236.843	247.565	166.494	284.412	316.519	284.603	242.231	342.024	282.646	289.972	246.666	375.245	168.38	204.727	233.241	286.185	267.592	288.247	265.617	257.454	293.106	313.822	182.97	260.49	304.15	284.013	294.939	286.204	274.166	234.849	177	232.161	262.964	201.233	183.565	198.558	299.369	287.002	248.062	195.535	187.42	186.856	391.007	186.488	157.226	230.336	244.733	203.904
283	357.22	236.846	250.715	168.31	281.069	314.38	287.786	243.262	343.333	285.209	292.637	242.267	379.433	168.318	206.343	231.616	287.515	264.848	289.428	265.355	262.79	295.664	317.475	181.84	257.835	304.127	283.73	294.924	285.249	274.367	235.022	171.031	234.21	263.198	198.235	184.262	199.776	303.104	286.165	245.168	195.906	187.007	183.274	390.301	184.739	157.226	230.05	246.238	205.47
284	356.157	236.313	250.664	169.911	278.9	314.909	290.564	244.553	344.641	282.966	295.837	238.217	382.019	168.547	203.153	227.323	288.946	262.165	290.074	265.235	263.854	297.679	322.197	180.759	255.712	305.704	283.446	294.79	284.828	274.389	234.826	168.265	236.259	263.235	195.168	184.877	200.585	306.839	285.328	242.439	196.16	186.516	179.777	389.555	183.055	157.349	229.729	247.87	207.005
285	355.628	234.715	251.68	170.98	276.304	312.766	293.128	246.123	345.843	280.723	292.099	234.478	383.539	168.824	205.302	224.632	290.49	259.362	291.575	265.293	265.454	299.034	323.716	179.823	249.323	298.211	283.119	294.597	283.981	274.269	234.589	170.302	238.195	263.095	192.055	185.419	200.998	309.934	284.586	239.839	196.461	185.951	176.438	388.932	181.435	157.431	229.427	249.596	208.162
286	354.564	232.582	252.161	171.834	274.776	311.159	295.543	247.957	348.005	280.082	292.098	231.02	383.457	169.004	204.782	220.339	292.108	256.619	293.502	265.351	270.788	299.749	328.439	179.179	246.134	294.452	282.722	294.107	283.24	274.15	234.557	169.671	239.71	262.78	188.919	185.917	201.063	312.744	283.906	237.367	196.948	185.364	173.278	387.939	179.882	157.595	229.132	251.541	209.069
287	354.035	233.652	256.38	172.475	273.034	311.687	297.702	250.074	349.848	280.507	288.894	227.776	384.443	169.233	205.863	217.647	293.759	254.113	295.429	265.338	271.321	299.813	329.959	178.437	239.745	290.161	282.276	293.795	282.606	273.959	234.526	167.973	241.057	262.298	185.78	186.388	200.852	315.056	283.069	235.153	197.365	184.76	170.306	387.069	178.362	157.965	228.899	253.769	209.881
288	355.108	231.52	255.26	172.903	271.079	309.012	299.626	252.47	351.476	281.467	289.426	224.774	384.895	169.558	208.011	215.488	295.428	251.252	297.784	265.254	274.52	299.247	333.079	177.89	235.487	286.933	281.823	293.246	282.185	273.626	234.617	165.741	242.319	261.667	182.667	186.843	200.429	316.728	282.326	232.866	197.689	184.172	167.509	386.077	176.899	158.745	228.736	256.123	210.442
289	357.781	231.523	256.277	173.224	268.269	308.472	301.635	255.102	353.318	279.224	286.757	222.034	386.413	169.884	212.295	214.399	297.066	248.034	299.712	265.134	277.721	298.002	337.265	177.245	236.035	287.444	281.357	292.697	281.978	273.15	234.544	165.643	243.385	260.901	179.608	187.286	199.831	317.616	281.49	230.744	197.944	183.596	164.922	385.289	175.499	159.32	228.626	258.35	210.595
290	359.387	233.125	258.358	172.691	266.314	312.202	303.431	257.939	355.267	278.048	286.22	219.614	384.198	170.549	211.242	209.039	298.609	245.291	301.318	264.659	279.854	296.184	343.589	176.406	231.247	281.552	280.917	291.851	281.877	272.497	234.964	163.411	244.197	260	176.625	187.723	199.051	317.936	280.935	228.862	198.314	183.082	162.513	384.05	174.181	160.017	228.571	260.547	210.278
291	360.458	232.594	260.442	172.158	264.358	312.729	305.014	260.998	356.469	277.94	284.084	217.505	384.651	171.069	212.856	208.481	300.027	242.785	302.392	264.468	284.656	293.764	348.31	175.568	227.525	279.927	280.52	290.827	281.349	271.808	235.014	158.511	244.841	258.971	173.747	188.147	198.032	317.508	280.349	227.2	198.662	182.545	160.327	383.221	172.921	160.756	228.567	262.775	209.457
292	358.862	232.064	261.99	170.665	263.257	311.122	306.382	264.266	357.67	278.9	286.216	215.707	384.036	171.492	211.802	207.926	301.238	240.161	303.572	264.313	286.79	290.831	349.83	174.729	223.269	275.1	280.249	289.745	280.501	271.226	234.9	162.683	245.233	257.817	171.011	188.554	196.703	316.369	279.827	225.851	198.893	182.059	158.397	382.187	171.717	161.29	228.615	265.002	208.574
293	358.866	230.465	259.271	168.851	262.583	310.583	307.687	267.743	358.872	281.993	286.749	214.112	383.953	171.526	212.884	210.57	302.191	237.892	304.645	263.979	284.652	287.412	352.95	173.842	218.478	274.544	280.129	288.128	279.76	270.501	234.622	165.254	245.372	256.533	168.442	188.945	195.017	314.589	279.178	224.613	199.217	181.629	156.732	380.989	170.57	161.742	228.712	267.293	207.158
294	358.337	230.468	261.354	167.465	262.548	311.11	308.479	271.429	359.753	280.819	283.543	212.673	384.404	171.513	215.033	212.149	302.925	235.801	306.146	263.468	287.852	283.595	354.471	173.1	217.426	269.182	280.172	286.452	279.233	269.812	234.015	162.487	245.173	255.115	166.064	189.32	192.958	312.525	278.31	223.558	199.681	181.227	155.331	379.75	169.476	162.398	228.895	269.113	205.647
295	360.477	231.537	263.436	166.185	261.98	311.639	308.952	275.361	362.342	279.11	283.009	211.301	383.791	171.499	215.046	212.66	303.395	233.947	307.219	262.957	292.119	279.458	356.523	172.553	217.439	261.689	280.391	284.48	278.812	269.23	233.696	160.788	244.75	253.57	163.902	189.672	190.581	309.856	277.411	222.688	200.005	180.814	154.229	378.593	168.463	163.014	229.117	270.776	204.011
296	362.082	229.938	257.515	164.584	261.199	312.165	309.018	279.455	364.718	278.467	283.539	210.075	381.573	171.582	216.127	212.102	303.626	231.857	308.933	262.695	291.05	275.137	360.175	171.859	216.386	257.929	280.836	282.389	279.139	268.541	232.925	158.555	243.962	251.903	161.973	189.994	188.007	306.688	276.354	222.002	200.004	180.497	153.418	377.518	167.544	163.466	229.392	272.03	202.249
297	362.621	230.475	257.464	162.984	259.991	314.829	308.829	283.693	367.093	281.561	283.005	208.985	380.425	171.762	216.14	211.545	303.65	230.418	310.007	262.575	289.447	270.611	364.899	171.021	212.663	254.171	281.45	280.18	280.318	267.639	232.237	161.127	243.202	250.116	160.282	190.28	185.375	303.308	275.329	221.518	199.934	180.218	152.914	376.32	166.739	163.999	229.725	273.159	200.141
298	361.557	229.943	255.278	161.384	258.996	312.152	308.17	287.996	369.469	278.785	277.131	208.059	377.675	171.846	218.822	212.055	303.524	228.742	310.653	262.491	288.911	265.912	366.952	170.473	211.609	250.945	282.165	277.615	281.925	266.985	231.466	161.565	242.273	248.218	158.837	190.518	182.821	299.357	274.272	221.144	200.049	179.929	152.721	374.958	166.063	164.369	230.149	273.849	198.097
299	361.562	225.674	253.624	159.463	257.575	311.08	307.276	292.322	372.379	278.678	274.996	207.289	376.525	171.929	217.768	213.101	303.247	227.185	311.086	262.478	292.111	261.076	368.469	169.441	205.218	249.319	282.993	275.109	283.853	266.652	230.531	161.467	241.147	246.218	157.633	190.712	180.46	294.909	273.216	220.973	200.165	179.701	152.857	373.965	165.527	164.738	230.662	274.193	196.115
300	363.701	229.947	254.64	157.756	257.647	311.073	306.062	296.575	373.26	275.366	273.926	206.684	374.308	171.818	222.585	215.745	302.825	225.865	311.946	262.18	292.11	256.221	370.523	168.699	202.564	242.36	283.958	272.841	285.567	266.283	229.268	162.437	240.106	244.112	156.666	190.868	178.348	290.283	272.379	221.023	200.419	179.569	153.259	372.685	165.139	164.82	231.297	274.287	194.008
301	361.039	228.349	250.852	155.302	258.254	312.135	304.356	300.776	374.249	278.994	272.858	206.186	372.626	171.755	224.735	218.924	302.284	224.961	312.593	262.096	289.973	251.356	375.245	168.2	203.113	237.532	285.012	270.275	286.853	265.95	227.963	165.006	238.953	241.9	155.925	190.992	176.485	285.195	271.542	221.11	200.604	179.476	153.954	371.61	164.894	164.779	232.014	273.94	191.492
302	361.043	228.351	248.131	152.955	259.074	310.528	301.925	304.856	375.344	285.825	270.187	205.833	371.478	171.79	227.951	218.9	301.592	223.7	312.92	262.261	289.972	246.666	379.433	168.38	204.727	233.241	286.185	267.592	288.247	265.617	226.577	167.044	237.771	239.589	155.403	191.089	174.877	280.177	270.642	221.251	200.789	179.428	154.876	370.206	164.842	164.574	232.796	273.28	189.228
303	358.378	226.752	244.878	150.501	259.253	307.852	298.897	308.853	375.264	280.913	266.983	205.704	369.794	171.582	228.499	220.478	300.781	222.38	313.032	262.64	292.637	242.267	382.019	168.318	206.343	231.616	287.515	264.848	289.428	265.355	224.984	169.08	236.674	237.179	155.099	191.174	173.504	275.231	269.868	221.504	201.044	179.447	156.007	368.967	164.923	164.123	233.618	272.086	186.901
304	357.317	227.822	238.955	148.153	259.966	309.982	295.227	312.71	374.972	280.27	263.245	205.768	365.444	171.229	227.978	222.59	299.851	221.238	313.786	262.876	295.837	238.217	383.539	168.547	203.153	227.323	288.946	262.165	290.074	265.235	223.639	170.051	235.745	234.662	155.005	191.244	172.35	270.498	268.969	221.848	201.437	179.489	157.301	367.728	165.156	163.507	234.461	270.798	184.48
305	358.388	226.757	233.568	146.126	260.252	311.043	290.875	316.406	374.679	282.298	262.709	205.998	364.295	171.118	230.127	220.967	298.808	220.689	313.898	263.467	292.099	234.478	383.457	168.824	205.302	224.632	290.49	259.362	291.575	265.293	222.293	169.42	235.125	232.056	155.118	191.297	171.428	265.587	268.258	222.339	201.715	179.492	158.799	366.407	165.525	163.219	235.299	269.227	182.404
306	358.392	226.759	232.447	144.953	260.111	309.97	286.16	319.906	374.066	281.655	257.905	206.479	359.942	171.055	229.605	224.145	297.721	219.784	313.798	263.775	292.098	231.02	384.443	169.004	204.782	220.339	292.108	256.619	293.502	265.351	220.907	169.323	234.562	229.373	155.433	191.334	170.767	260.854	267.641	223.07	201.923	179.506	160.447	365.291	166.078	162.973	236.154	267.405	180.517
307	359.464	227.829	232.396	143.886	259.757	307.293	281.317	323.188	372.812	287.42	254.699	207.136	355.057	170.945	231.755	226.257	296.69	219.591	313.59	264.189	288.894	227.776	384.895	169.233	205.863	217.647	293.759	254.113	295.429	265.338	219.479	170.292	234.111	226.622	155.949	191.361	170.341	256.122	267.181	223.875	202.224	179.486	162.265	364.257	166.739	162.563	237.014	265.426	178.849
308	359.47	227.298	222.204	143.46	259.723	303.554	276.239	326.15	372.413	290.514	257.367	207.87	349.639	170.979	233.904	229.435	295.716	219.457	313.276	264.852	289.426	224.774	386.413	169.558	208.011	215.488	295.428	251.252	297.784	265.254	217.887	178.2	233.716	223.824	156.654	191.374	170.124	251.673	266.972	224.697	202.548	179.438	164.225	363.018	167.53	161.947	237.893	263.353	177.37
309	358.405	228.902	220.551	142.927	259.902	305.681	271.054	328.778	371.906	289.87	257.364	208.682	346.889	170.674	235.518	233.682	294.899	219.382	311.467	265.586	286.757	222.034	384.198	169.884	212.295	214.399	297.066	248.034	299.712	265.134	216.337	178.636	233.433	220.999	157.542	191.372	170.058	247.439	266.763	225.557	202.733	179.306	166.295	361.615	168.381	161.126	238.843	260.904	176.236
310	359.479	225.701	217.298	142.18	260.082	304.608	265.784	331.057	371.507	288.696	256.296	209.581	344.137	170.127	236.065	234.727	294.276	219.367	309.339	266.605	286.22	219.614	384.651	170.549	211.242	209.039	298.609	245.291	301.318	264.659	214.909	179.605	233.15	218.163	158.602	191.359	170.063	243.453	266.46	226.471	202.941	179.146	168.413	360.499	169.34	160.223	239.814	258.203	175.447
311	356.282	226.771	216.179	141.54	260.475	303.536	260.471	332.98	371.321	290.19	253.625	210.529	338.719	169.676	237.147	239.506	293.766	219.767	306.783	267.695	284.084	217.505	384.036	171.069	212.856	208.481	300.027	242.785	302.392	264.468	213.686	180.043	233.12	215.34	159.831	191.32	170.034	239.539	266.157	227.405	203.266	178.822	170.552	359.3	170.356	159.237	240.762	255.627	175.003
312	358.954	224.104	219.33	141.968	261.294	306.197	255.2	334.577	370.815	295.418	250.421	211.573	333.835	169.42	238.228	239.483	293.395	220.048	305.082	268.607	286.216	215.707	383.953	171.492	211.802	207.926	301.238	240.161	303.572	264.313	212.546	185.815	233.287	212.559	161.213	191.207	169.932	235.909	265.979	228.485	203.706	178.331	172.724	357.979	171.465	158.17	241.66	252.926	174.905
313	357.892	219.838	214.476	142.289	262.541	303.524	250.229	335.892	370.416	295.844	249.353	212.647	329.484	168.97	240.377	242.127	293.149	220.092	302.633	269.412	286.749	214.112	384.404	171.526	212.884	210.57	302.191	237.892	304.645	263.979	211.652	185.717	233.735	209.864	162.745	190.994	169.744	232.528	265.99	229.289	204.007	177.698	174.936	356.699	172.675	157.144	242.529	250.288	175.121
314	353.627	220.374	211.221	142.717	263.681	301.914	245.685	336.923	370.337	295.201	245.614	213.779	323.533	168.713	239.323	245.307	293.016	220.017	300.825	270.289	283.543	212.673	383.791	171.513	215.033	212.149	302.925	235.801	306.146	263.468	210.758	188.289	234.547	207.301	164.425	190.678	169.501	229.468	266.189	230.075	204.331	176.954	177.168	355.296	173.994	155.953	243.3	247.713	175.651
315	353.631	220.377	207.433	143.786	264.821	299.241	241.802	337.681	369.937	297.762	243.478	214.998	317.579	168.263	239.87	249.019	292.978	220.002	299.017	271.592	283.009	211.301	381.573	171.499	215.046	212.66	303.395	233.947	307.219	262.957	210.028	188.726	235.922	204.926	166.245	190.248	169.251	226.585	266.64	230.843	204.655	176.075	179.427	354.015	175.334	154.927	244.051	245.232	176.495
316	353.635	223.047	209.516	145.067	265.961	297.633	238.56	338.109	369.004	299.79	241.874	216.324	312.161	167.57	244.154	251.665	293.052	219.512	296.888	272.789	283.539	210.075	380.425	171.582	216.127	212.102	303.626	231.857	308.933	262.695	209.381	190.761	237.409	202.798	168.197	189.718	169.082	224.236	267.059	231.426	204.979	175.15	181.651	352.817	176.725	153.859	244.775	242.908	177.684
317	355.241	220.381	209.464	145.708	266.674	298.162	235.787	338.193	368.604	298.614	242.94	217.641	307.277	166.683	244.7	255.376	293.227	218.844	293.265	273.95	283.005	208.985	377.675	171.762	216.14	211.545	303.65	230.418	310.007	262.575	208.856	192.265	239.092	200.961	170.276	189.128	169.037	221.994	267.572	232.194	205.234	174.192	183.781	351.045	178.16	152.833	245.527	240.615	179.249
318	353.644	221.451	209.412	146.67	267.814	299.222	233.527	337.935	367.138	301.174	242.404	218.976	298.121	165.747	244.714	258.022	293.464	217.999	290.069	275.111	277.131	208.059	376.525	171.846	218.822	212.055	303.524	228.742	310.653	262.491	208.947	195.369	241.085	199.432	172.472	188.501	169.125	220.143	268.179	232.887	205.627	173.105	185.834	349.066	179.621	151.684	246.282	238.573	181.192
319	351.514	220.386	208.292	147.738	268.528	299.751	231.822	337.356	365.245	303.202	239.734	220.341	292.17	164.811	244.196	264.938	293.777	217.035	286.873	276.521	274.996	207.289	374.308	171.929	217.768	213.101	303.247	227.185	311.086	262.478	208.751	195.272	243.19	198.224	174.774	187.842	169.331	218.506	268.818	233.397	206.3	171.905	187.824	346.801	181.061	150.206	247.026	236.814	183.009
320	350.985	219.32	211.979	148.379	268.814	303.481	230.629	336.494	362.924	304.16	241.332	221.735	286.751	164.361	244.742	263.846	294.178	215.596	283.57	277.967	273.926	206.684	372.626	171.818	222.585	215.745	302.825	225.865	311.946	262.18	208.596	193.573	245.463	197.348	177.168	187.174	169.632	217.331	269.237	233.834	207.088	170.571	189.736	344.289	182.519	148.728	247.747	235.275	185.108
321	350.99	220.39	212.461	148.914	269.42	302.94	229.863	335.418	360.923	308.855	241.865	223.09	282.934	164.056	247.426	267.024	294.698	213.98	279.947	279.839	272.858	206.186	371.478	171.755	224.735	218.924	302.284	224.961	312.593	262.096	208.728	195.076	247.849	196.793	179.647	186.538	169.98	216.334	269.875	234.16	207.853	169.119	191.585	342.065	183.932	147.332	248.506	233.61	187.396
322	350.46	220.393	217.212	149.662	270.026	301.334	229.758	334.157	358.816	309.815	242.929	224.484	278.048	163.702	248.505	263.8	295.3	212.541	276.751	281.641	270.187	205.833	369.794	171.79	227.951	218.9	301.592	223.7	312.92	262.261	209.353	197.648	250.347	196.562	182.205	185.969	170.358	215.622	270.451	234.393	208.525	167.543	193.373	339.922	185.257	145.977	249.28	232.071	189.715
323	349.931	219.862	220.361	150.41	270.312	300.259	230.167	332.752	357.135	309.707	242.928	225.956	272.63	163.252	250.654	266.977	295.977	211.044	273.235	283.443	266.983	205.704	365.444	171.582	228.499	220.478	300.781	222.38	313.032	262.64	210.142	198.085	252.648	196.666	184.833	185.519	170.779	215.194	270.996	234.498	209.058	165.888	195.081	337.369	186.441	144.54	250.082	230.594	192.129
324	348.335	219.863	223.512	152.119	270.491	302.922	230.98	331.208	355.028	311.201	246.129	227.514	266.145	163.286	249.599	272.293	296.667	209.546	269.398	285.173	263.245	205.768	364.295	171.229	227.978	222.59	299.851	221.238	313.786	262.876	211.096	200.657	255.174	197.11	187.527	185.222	171.259	214.766	271.195	234.511	209.614	164.2	196.69	334.529	187.483	143.268	250.95	229.274	194.605
325	347.806	221.467	229.864	154.147	270.564	303.45	232.263	329.58	352.814	313.759	246.128	229.015	264.462	163.37	250.682	276.005	297.344	207.988	265.455	286.583	262.709	205.998	359.942	171.118	230.127	220.967	298.808	220.689	313.898	263.467	212.049	198.958	257.841	197.876	190.284	185.081	171.817	214.303	271.049	234.451	210.171	162.438	198.223	331.278	188.328	141.872	251.901	228.143	196.924
326	346.21	223.071	234.082	156.603	270.53	301.841	234.144	327.864	350.387	317.923	242.921	230.448	260.11	163.938	251.229	280.253	297.99	206.313	261.298	287.922	257.905	206.479	355.057	171.055	229.605	224.145	297.721	219.784	313.798	263.775	212.962	197.793	260.536	198.95	193.089	185.077	172.458	214.267	270.903	234.353	210.704	160.604	199.687	327.576	189.001	140.271	252.958	227.326	198.992
327	344.612	221.472	242.57	158.952	270.176	304.504	236.324	326.097	347.532	318.881	240.787	231.764	257.893	164.652	251.243	280.23	298.598	204.696	257.248	289.617	254.699	207.136	349.639	170.945	231.755	226.257	296.69	219.591	313.59	264.189	213.874	200.898	263.455	200.299	195.935	185.194	173.154	214.373	270.819	234.127	211.097	158.725	201.087	323.956	189.47	138.834	254.138	226.666	200.746
328	341.95	219.873	249.456	161.088	269.394	304.499	238.91	324.339	344.678	318.772	240.252	232.983	254.61	165.851	250.188	282.873	299.2	202.902	253.945	291.419	257.367	207.87	346.889	170.979	233.904	229.435	295.716	219.457	313.276	264.852	214.622	199.732	266.375	201.889	198.809	185.399	173.853	214.763	270.799	233.864	211.491	156.806	202.419	320.253	189.805	137.233	255.411	225.974	202.25
329	340.887	219.341	252.607	162.69	268.4	300.758	241.688	322.632	341.61	318.664	240.783	234.105	251.859	167.389	250.736	282.851	299.751	201.345	250.963	293.149	257.364	208.682	344.137	170.674	235.518	233.682	294.899	219.382	311.467	265.586	215.493	201.768	269.378	203.68	201.702	185.664	174.504	215.332	270.653	233.49	211.955	154.865	203.661	316.346	189.955	135.55	256.777	225.251	203.752
330	338.223	218.812	257.892	164.398	268.152	298.615	244.529	320.954	338.542	321.224	242.382	235.227	250.71	169.025	251.818	287.097	300.252	200.144	248.087	294.666	256.296	209.581	338.719	170.127	236.065	234.727	294.276	219.367	309.339	266.605	216.447	201.671	272.466	205.645	204.602	185.997	175.042	215.9	270.507	233.283	212.372	152.974	204.758	312.767	189.906	133.908	258.235	224.59	204.973
331	336.625	220.948	262.108	166.32	267.905	299.144	247.307	319.358	334.406	322.719	243.446	236.379	246.894	170.758	251.298	289.208	300.647	198.883	246.385	296.041	253.625	210.529	333.835	169.676	237.147	239.506	293.766	219.767	306.783	267.695	217.195	202.108	275.582	207.748	207.496	186.376	175.423	216.86	270.266	233.02	212.673	151.095	205.71	308.941	189.607	132.06	259.771	224.055	206.005
332	335.565	220.949	267.929	168.776	268.084	300.738	250.234	317.851	331.019	322.077	244.512	237.569	244.676	172.442	252.379	292.387	300.947	197.148	244.897	297.522	250.421	211.573	329.484	169.42	238.228	239.483	293.395	220.048	305.082	268.607	218.271	205.213	278.67	209.951	210.379	186.756	175.623	217.82	269.9	232.665	213.09	149.232	206.499	305.075	189.071	130.213	261.405	223.803	206.441
333	332.899	222.553	271.08	171.766	268.05	299.666	253.055	316.395	326.777	320.9	247.178	238.691	245.129	174.369	252.392	293.964	301.147	195.591	243.195	298.968	249.353	212.647	323.533	168.97	240.377	242.127	293.149	220.092	302.633	269.412	219.307	206.715	281.758	212.209	213.239	187.11	175.625	218.709	269.472	232.309	213.483	147.437	207.101	301.208	188.198	128.489	263.134	223.74	206.405
334	335.039	218.822	279.033	174.969	267.909	301.792	255.982	315.018	322.428	319.725	245.042	239.6	242.912	176.441	253.474	297.144	301.31	194.153	241.494	300.413	245.614	213.779	317.579	168.713	239.323	245.307	293.016	220.017	300.825	270.289	220.219	208.219	284.2	214.478	216.065	187.425	175.423	219.775	268.604	231.973	213.808	145.659	207.566	297.547	187.055	126.6	264.949	223.738	206.276
335	332.376	220.957	282.183	178.385	267.128	304.456	258.845	313.72	318.079	321.753	247.174	240.285	243.364	178.756	251.886	294.987	301.478	192.596	239.792	301.646	243.478	214.998	312.161	168.263	239.87	249.019	292.978	220.002	299.017	271.592	221.172	209.188	286.502	216.687	218.857	187.669	175.04	220.877	267.83	231.489	214.085	143.864	207.946	293.886	185.66	124.589	266.887	223.8	206.083
336	331.846	221.494	281.065	182.549	265.919	301.248	261.495	312.519	314.584	322.712	246.639	240.709	242.214	181.459	251.367	299.233	301.634	191.216	237.984	302.985	241.874	216.324	307.277	167.57	244.154	251.665	293.052	219.512	296.888	272.789	222.249	210.159	288.494	218.784	221.608	187.833	174.512	221.944	266.961	231.042	214.317	142.125	208.24	290.389	184.042	122.659	268.938	223.768	205.609
337	329.184	221.495	284.214	186.286	264.818	303.909	263.888	311.397	310.556	323.138	246.104	240.89	242.667	184.308	253.514	299.744	301.778	190.312	236.709	304.253	242.94	217.641	298.121	166.683	244.7	255.376	293.227	218.844	293.265	273.95	222.833	211.663	290.29	220.733	224.321	187.935	173.885	223.224	266.438	230.668	214.502	140.476	208.402	287.22	182.197	120.566	271.088	223.892	204.82
338	329.188	224.699	286.83	189.915	263.61	306.574	266.218	310.382	307.381	322.495	251.439	240.886	244.721	187.302	251.927	297.052	301.927	189.644	235.435	305.592	242.404	218.976	292.17	165.747	244.714	258.022	293.464	217.999	290.069	275.111	223.581	211.032	292.001	222.502	226.99	187.978	173.213	224.611	265.979	230.313	214.64	138.883	208.466	284.257	180.209	118.595	273.332	224.08	203.843
339	328.125	222.035	288.379	193.865	262.188	304.966	268.334	309.501	303.886	320.252	248.768	240.757	245.706	190.345	253.01	297.028	302.077	188.858	234.48	306.611	239.734	220.341	286.751	164.811	244.196	264.938	293.777	217.035	286.873	276.521	224.329	209.867	293.516	224.058	229.621	187.948	172.554	226.247	265.362	230.087	214.848	137.38	208.398	281.786	178.106	116.748	275.649	224.267	202.709
340	327.062	222.037	289.929	198.242	260.339	309.763	270.3	308.778	300.712	322.28	247.165	240.521	246.691	193.096	253.023	297.539	302.17	188.427	233.525	307.487	241.332	221.735	282.934	164.361	244.742	263.846	294.178	215.596	283.57	277.967	224.995	211.904	294.638	225.402	232.218	187.851	171.958	228.025	264.808	229.861	214.964	135.95	208.184	279.439	175.901	114.9	277.942	224.894	201.355
341	329.735	221.505	289.877	202.192	259.025	306.02	272.246	308.227	298.284	324.307	248.765	240.216	247.677	196.091	254.639	299.117	302.251	188.649	233.425	308.008	241.865	223.09	278.048	164.056	247.426	267.024	294.698	213.98	279.947	279.839	225.744	210.205	295.535	226.513	234.79	187.68	171.475	229.625	264.379	229.543	215.125	134.565	207.872	277.707	173.674	113.299	280.228	225.678	200.064
342	328.138	222.575	290.893	206.676	257.069	307.081	273.956	307.871	295.536	323.132	248.762	239.776	250.798	199.085	254.652	298.56	302.313	189.226	233.751	308.03	242.929	224.484	272.63	163.702	248.505	263.8	295.3	212.541	276.751	281.641	226.328	209.04	296.432	227.359	237.342	187.435	171.166	231.19	264.233	229.445	215.148	133.27	207.513	276.345	171.492	112.067	282.534	226.336	198.647
343	331.878	220.976	291.375	212.12	255.007	308.675	275.304	307.714	292.789	325.158	247.694	239.181	254.454	202.565	256.267	296.936	302.281	190.041	234.397	307.768	242.928	225.956	266.145	163.252	250.654	266.977	295.977	211.044	273.235	283.443	226.542	207.875	296.823	227.923	239.888	187.124	171.093	232.684	264.526	229.366	214.915	132.07	207.09	275.024	169.39	110.836	284.897	227.088	197.231
344	328.147	220.445	290.79	217.031	252.945	309.738	276.224	307.762	291.108	319.712	248.224	238.489	254.372	205.85	256.812	295.311	302.154	192.279	235.151	307.435	246.129	227.514	264.462	163.286	249.599	272.293	296.667	209.546	269.398	285.173	226.716	207.244	296.962	228.204	242.439	186.767	171.312	234	265.008	229.379	214.775	130.966	206.582	274.482	167.377	109.974	287.276	227.778	195.846
345	326.016	222.048	289.138	222.262	250.989	306.53	276.739	308.022	289.962	320.139	249.291	237.699	257.491	209.038	257.895	295.288	301.996	194.636	236.758	307.173	246.128	229.015	260.11	163.37	250.682	276.005	297.344	207.988	265.455	286.583	227.012	207.147	296.876	228.188	245.001	186.38	171.851	235.6	265.647	229.447	214.612	130.014	205.984	274.721	165.446	109.317	289.689	228.719	194.555
346	326.021	224.184	288.552	227.386	248.18	309.191	276.934	308.492	288.281	323.232	251.423	236.823	260.61	211.596	260.576	297.4	301.813	196.993	238.044	306.84	242.921	230.448	257.893	163.938	251.229	280.253	297.99	206.313	261.298	287.922	227.186	207.049	296.481	227.886	247.582	185.987	172.693	236.88	266.348	229.479	214.518	129.23	205.283	275.411	163.586	108.906	292.069	229.942	193.295
347	324.424	225.255	288.5	232.617	245.264	310.787	276.83	309.203	287.455	322.592	253.557	235.966	264.266	213.862	258.989	293.108	301.611	199.527	239.012	306.079	240.787	231.764	254.61	164.652	251.243	280.23	298.598	204.696	257.248	289.617	227.318	207.486	295.721	227.323	250.176	185.614	173.789	238.196	267.426	229.547	214.402	128.609	204.523	276.102	161.812	108.537	294.359	231.071	192.004
348	323.362	225.257	286.847	237.315	242.668	310.78	276.363	310.151	286.735	321.416	254.089	235.137	266.318	215.983	256.868	292.551	301.421	202.833	240.512	305.319	240.252	232.983	251.859	165.851	250.188	282.873	299.2	202.902	253.945	291.419	226.958	206.319	294.539	226.509	252.783	185.269	175.074	239.404	268.41	229.744	214.192	128.123	203.72	277.326	160.171	108.619	296.49	232.294	190.87
349	322.832	224.726	285.195	241.692	239.753	312.91	275.682	311.299	286.122	322.908	250.351	234.309	267.304	218.055	256.881	292.528	301.213	206.02	242.333	304.346	240.783	234.105	250.71	167.389	250.736	282.851	299.751	201.345	250.963	293.149	226.351	205.689	292.768	225.434	255.388	184.962	176.473	240.542	269.426	230.088	213.843	127.76	202.857	278.96	158.645	108.578	298.472	233.455	189.704
350	322.306	227.398	283.542	244.788	236.303	313.971	274.852	312.65	286.47	326.536	249.814	233.607	272.026	219.74	259.031	290.903	300.967	209.74	244.581	303.265	242.382	235.227	246.894	169.025	251.818	287.097	300.252	200.144	248.087	294.666	225.868	203.991	290.8	224.109	257.979	184.705	177.937	241.538	270.755	230.524	213.611	127.527	201.943	281.046	157.314	108.947	300.334	234.741	188.821
351	320.709	228.467	281.889	247.99	233.174	312.898	273.702	314.192	286.925	331.231	250.347	233.022	276.747	221.424	260.111	289.813	300.652	213.639	247.042	301.509	243.446	236.379	244.676	170.758	251.298	289.208	300.647	198.883	246.385	296.041	224.851	205.495	288.438	222.54	260.538	184.5	179.464	242.747	272.492	231.108	213.471	127.423	200.961	283.872	156.176	109.399	302.088	236.09	187.939
352	319.646	227.935	281.303	250.66	230.898	313.958	272.403	315.878	287.7	333.792	247.676	232.485	279.867	222.817	259.058	286.054	300.269	218.13	250.036	299.539	244.512	237.569	245.129	172.442	252.379	292.387	300.947	197.148	244.897	297.522	223.957	204.863	285.515	220.724	263.05	184.339	181.065	243.6	274.167	231.802	213.215	127.414	199.902	287.189	155.254	110.138	303.686	237.533	186.993
353	318.582	227.937	281.251	252.475	227.982	313.953	271.018	317.703	290.395	336.353	251.944	232.064	281.387	223.871	260.138	281.76	299.828	221.673	253.031	297.427	247.178	238.691	242.912	174.369	252.392	293.964	301.147	195.591	243.195	298.968	223.145	201.03	282.733	218.678	265.5	184.232	182.75	244.311	275.842	232.606	213.028	127.535	198.787	291.123	154.503	110.795	305.174	238.976	186.298
354	318.586	227.94	279.065	254.717	224.745	317.147	269.398	319.644	294.052	334.109	246.605	231.769	283.44	224.633	261.755	283.338	299.331	225.749	256.559	295.493	245.042	239.6	243.364	176.441	253.474	297.144	301.31	194.153	241.494	300.413	222.292	204.133	279.641	216.448	267.87	184.171	184.54	244.915	277.265	233.466	212.703	127.79	197.681	295.385	153.951	111.493	306.56	240.419	185.761
355	317.526	227.943	277.946	257.28	222.256	320.877	267.308	321.659	297.175	338.271	248.203	231.562	284.959	225.153	260.166	282.782	298.715	230.122	260.195	293.416	247.174	240.285	242.214	178.756	251.886	294.987	301.478	192.596	239.792	301.646	221.398	204.035	276.465	214.049	270.14	184.135	186.442	245.376	278.595	234.362	212.447	128.152	196.597	300.016	153.566	112.026	307.803	242.019	185.443
356	315.927	229.546	276.827	258.668	219.874	320.872	264.813	323.753	300.938	341.366	247.135	231.481	287.013	225.576	262.314	283.826	297.998	234.85	264.15	291.446	246.639	240.709	242.667	181.459	251.367	299.233	301.634	191.216	237.984	302.985	220.833	202.872	272.952	211.505	272.289	184.114	188.427	245.874	280.144	235.332	212.121	128.661	195.529	304.976	153.389	112.806	308.886	243.808	185.345
357	317.001	230.083	273.04	259.95	216.744	323.535	261.699	325.916	304.488	345.526	246.067	231.604	289.066	226.096	263.396	280.6	297.206	239.223	267.679	289.512	246.104	240.89	244.721	184.308	253.514	299.744	301.778	190.312	236.709	304.253	219.98	201.706	269.327	208.842	274.292	184.119	190.449	246.264	281.787	236.265	211.865	129.36	194.474	310.182	153.358	113.586	309.852	245.376	185.246
358	316.471	233.285	270.32	260.911	214.362	326.197	258.073	328.108	306.544	347.019	244.997	231.989	292.719	226.518	263.41	279.512	296.345	244.011	271.954	287.613	251.439	240.886	245.706	187.302	251.927	297.052	301.927	189.644	235.435	305.592	218.962	204.278	265.59	206.087	276.123	184.141	192.468	246.406	283.336	237.309	211.47	130.25	193.462	315.306	153.467	114.49	310.635	246.568	185.211
359	319.145	233.822	268.667	261.447	212.62	325.656	253.976	330.327	308.492	344.778	244.46	232.703	295.306	226.601	265.026	278.954	295.446	248.799	276.55	285.501	248.768	240.757	246.691	190.345	253.01	297.028	302.077	188.858	234.48	306.611	218.151	204.714	261.627	203.241	277.759	184.176	194.428	246.619	284.634	238.352	211.121	131.387	192.42	320.923	153.725	115.146	311.259	247.948	185.553
360	315.413	232.757	269.149	260.913	210.878	327.252	249.71	332.574	309.8	345.202	244.993	233.748	297.361	226.49	264.505	283.199	294.56	253.409	280.932	283.211	247.165	240.521	247.677	193.096	253.023	297.539	302.17	188.427	233.525	307.487	217.38	203.017	257.468	200.344	279.174	184.222	196.274	246.831	285.493	239.433	210.935	132.8	191.344	326.827	154.093	116.132	311.714	249.297	185.988
361	312.749	232.758	266.43	260.594	208.816	330.447	245.315	334.784	311.216	342.96	244.456	235.006	303.682	225.797	267.187	285.845	293.679	257.722	285.422	280.956	248.765	240.216	250.798	196.091	254.639	299.117	302.251	188.649	233.425	308.008	216.609	199.715	253.113	197.435	280.347	184.271	197.962	247.044	286.226	240.679	210.795	134.421	190.276	332.485	154.506	117.035	312	250.803	186.675
362	314.888	233.83	265.844	259.314	207.074	328.308	241.048	336.943	313.591	346.587	246.589	236.4	306.269	224.716	269.336	280.484	292.755	262.273	290.018	278.702	248.762	239.776	254.454	199.085	254.652	298.56	302.313	189.226	233.751	308.03	215.838	200.685	248.982	194.543	281.259	184.299	199.478	247.292	286.802	241.796	210.609	136.21	189.26	338.143	154.982	118.266	312.103	252.215	187.424
363	313.825	235.967	264.724	257.393	204.585	332.037	236.717	339.065	316.287	346.479	245.521	237.939	309.923	223.344	269.884	277.26	291.806	266.171	294.4	276.092	247.694	239.181	254.372	202.565	256.267	296.936	302.281	190.041	234.397	307.768	215.191	202.189	244.823	191.695	281.906	184.297	200.802	247.683	287.472	243.005	210.446	138.162	188.213	343.719	155.521	119.334	312.064	253.595	188.268
364	311.161	237.571	259.335	255.366	202.096	335.233	232.514	341.08	318.343	343.703	242.317	239.653	310.375	221.971	269.363	277.237	290.826	269.892	297.715	273.41	248.224	238.489	257.491	205.85	256.812	295.311	302.154	192.279	235.151	307.435	214.543	203.693	240.579	188.932	282.28	184.265	201.928	247.86	287.859	244.214	210.097	140.209	187.218	349.376	156.146	120.483	311.925	255.069	189.457
365	313.3	237.574	254.479	253.659	200.034	337.896	228.396	342.975	321.466	339.326	241.246	241.542	314.028	220.551	268.843	278.28	289.839	273.197	301.564	270.693	249.291	237.699	260.61	209.038	257.895	295.288	301.996	194.636	236.758	307.173	213.485	204.662	236.477	186.274	282.381	184.208	202.853	247.966	288.184	245.46	209.794	142.363	186.274	354.788	156.868	121.633	311.714	256.512	190.678
366	312.772	241.31	254.428	251.525	199.146	337.355	224.492	344.721	325.122	339.218	240.179	243.644	315.015	218.936	268.856	278.791	288.853	276.325	304.665	268.118	251.423	236.823	264.266	211.596	260.576	297.4	301.813	196.993	238.044	306.84	212.59	205.099	232.43	183.712	282.226	184.126	203.583	247.752	288.446	246.688	209.562	144.652	185.339	359.707	157.671	122.864	311.384	257.798	192.526
367	312.243	240.245	253.309	249.818	198.685	337.349	220.738	346.305	328.032	338.577	240.71	245.95	320.803	217.175	268.338	279.302	287.834	279.215	307.873	265.651	253.557	235.966	266.318	213.862	258.989	293.108	301.611	199.527	239.012	306.079	211.902	204.467	228.608	181.271	281.83	184.03	204.106	247.822	288.425	247.916	209.375	147.104	184.37	364.092	158.506	124.137	310.958	258.708	194.375
368	311.714	242.917	254.324	248.537	199.505	340.545	217.346	347.693	332.115	339.002	238.573	248.314	321.255	215.269	270.485	277.678	286.772	281.69	310.335	262.969	254.089	235.137	267.304	215.983	256.868	292.551	301.421	202.833	240.512	305.319	211.254	207.571	225.039	178.977	281.208	183.919	204.415	247.893	288.217	249.143	209.189	149.742	183.375	368.354	159.379	125.451	310.403	259.586	196.191
369	314.386	242.918	250.004	246.297	201.179	339.472	214.274	348.906	335.559	337.293	238.572	250.64	321.708	213.072	271.566	273.92	285.641	284.047	313.222	260.394	250.351	234.309	272.026	218.055	256.881	292.528	301.213	206.02	242.333	304.346	210.524	204.271	221.47	176.84	280.39	183.8	204.504	247.856	288.102	250.371	209.003	152.593	182.401	372.575	160.265	126.682	309.738	260.338	198.291
370	314.926	245.057	246.751	243.842	204.026	338.931	211.481	349.895	339.535	335.582	237.502	252.858	325.895	210.923	269.981	274.428	284.441	286.344	315.043	258.211	249.814	233.607	276.747	219.74	259.031	290.903	300.967	209.74	244.581	303.265	209.917	206.309	218.041	174.878	279.406	183.69	204.362	248.069	287.956	251.58	208.701	155.651	181.478	376.508	161.139	127.873	308.971	261.185	200.485
371	319.2	245.594	246.165	240.748	205.807	339.46	208.857	350.653	342.338	329.604	236.967	254.912	327.948	208.726	269.994	276.54	283.153	288.167	316.223	256.099	250.347	233.022	279.867	221.424	260.111	289.813	300.652	213.639	247.042	301.509	209.516	205.145	214.865	173.141	278.296	183.599	203.975	248.317	287.904	252.826	208.537	158.901	180.65	380.154	162.018	128.94	308.164	261.843	202.615
372	317.603	248.262	243.446	238.081	208.014	338.386	206.597	351.188	345.248	326.83	236.964	256.82	333.736	207.014	267.338	277.05	281.846	290.168	317.404	254.094	247.676	232.485	281.387	222.817	259.058	286.054	300.269	218.13	250.036	299.539	209.484	205.048	211.886	171.638	277.097	183.534	203.352	248.708	288.04	254.035	208.467	162.28	179.894	383.062	162.92	130.007	307.345	262.532	204.84
373	321.343	257.339	247.129	235.413	210.115	336.779	204.721	351.486	346.983	326.721	236.429	258.631	334.189	205.302	269.487	278.63	280.533	291.753	319.011	252.088	251.944	232.064	283.44	223.871	260.138	281.76	299.828	221.673	253.031	297.427	208.918	206.017	209.159	170.368	275.861	183.502	202.513	249.348	288.082	255.134	208.351	165.788	179.245	385.558	163.811	131.157	306.542	263.034	206.783
374	323.481	255.739	244.942	233.173	212.749	334.104	203.272	351.505	349.465	323.944	235.893	260.181	334.107	203.687	268.434	279.14	279.232	293.161	320.618	250.332	246.605	231.769	284.959	224.633	261.755	283.338	299.331	225.749	256.559	295.493	208.558	204.318	206.573	169.345	274.64	183.496	201.502	250.415	288.093	256.14	208.21	169.408	178.694	387.808	164.639	132.347	305.725	263.346	208.82
375	325.622	261.079	242.756	230.505	214.316	334.097	202.378	351.279	350.56	319.568	235.358	261.332	334.025	202.266	267.379	280.183	277.887	294.451	322.652	248.504	248.203	231.562	287.013	225.153	260.166	282.782	298.715	230.122	260.195	293.416	208.28	206.889	204.465	168.575	273.482	183.497	200.389	251.481	287.884	257.202	208.047	173.107	178.207	389.525	165.373	133.333	304.92	264.099	211.076
376	329.363	265.884	243.77	228.158	216.523	337.294	202.167	350.816	351.228	316.255	236.422	262.163	335.546	200.991	267.393	277.492	276.499	294.91	325.007	246.926	247.135	231.481	289.066	225.576	262.314	283.826	297.998	234.85	264.15	291.446	207.919	205.724	202.665	168.056	272.432	183.491	199.259	252.405	288.083	258.191	207.884	176.812	177.758	390.872	166.029	134.154	304.136	264.569	213.113
377	331.501	273.357	242.653	224.956	218.517	333.019	202.404	350.139	352.002	313.479	235.354	262.587	339.733	200.007	269.542	276.4	275.079	295.31	327.147	245.525	246.067	231.604	292.719	226.096	263.396	280.6	297.206	239.223	267.679	289.512	208.011	206.162	201.006	167.803	271.529	183.482	198.194	253.472	288.377	259.198	208.046	180.5	177.382	391.809	166.594	134.728	303.35	265.007	215.118
378	335.242	281.366	242.601	220.901	221.152	331.946	203.175	349.268	352.564	314.437	235.351	262.554	341.252	199.217	269.022	277.447	273.646	295.057	328.754	244.658	244.997	231.989	295.306	226.518	263.41	279.512	296.345	244.011	271.954	287.613	208.472	210.332	199.909	167.836	270.805	183.461	197.266	254.788	288.67	260.094	208.022	184.081	177.079	392.458	167.046	135.467	302.58	265.414	216.935
379	338.449	286.707	240.413	216.845	223.145	332.472	204.416	348.239	353.125	313.263	232.68	262.221	338.502	198.233	269.036	277.423	272.201	294.152	329.827	243.969	244.46	232.703	297.361	226.601	265.026	278.954	295.446	248.799	276.55	285.501	208.973	211.836	199.121	168.168	270.278	183.416	196.515	256.352	288.838	260.861	207.905	187.511	176.805	392.574	167.411	136.165	301.83	265.507	218.438
380	338.453	292.043	238.76	212.577	225.032	331.4	206.275	347.034	353.579	311.021	234.813	261.655	338.42	197.491	266.915	282.735	270.794	293.129	330.688	243.672	244.993	233.748	303.682	226.49	264.505	283.199	294.56	253.409	280.932	283.211	209.393	214.94	198.754	168.792	269.956	183.34	195.941	258.237	288.943	261.537	207.626	190.766	176.6	392.279	167.746	136.822	301.086	265.695	219.69
381	341.659	300.585	239.777	208.095	226.813	327.657	208.498	345.712	354.781	307.178	235.88	260.807	336.738	196.652	264.26	283.78	269.462	291.394	331.334	243.659	244.456	235.006	306.269	225.797	267.187	285.845	293.679	257.722	285.422	280.956	209.69	216.977	198.359	169.71	269.848	183.227	195.513	260.371	288.86	262.028	207.695	193.808	176.493	391.286	168.025	137.561	300.363	266.008	220.377
382	344.334	308.593	239.192	202.972	228.807	325.516	211.297	344.21	355.236	307.07	233.744	259.785	337.725	196.153	261.605	281.087	268.18	289.599	332.194	243.93	246.589	236.4	309.923	224.716	269.336	280.484	292.755	262.273	290.018	278.702	210.068	217.414	198.301	170.912	269.947	183.07	195.167	262.541	289.122	262.649	207.764	196.647	176.488	389.883	168.27	138.218	299.671	266.446	220.938
383	343.804	310.197	239.14	197.849	230.374	321.241	214.353	342.545	355.904	304.827	234.808	258.598	342.446	195.509	261.62	280.532	266.948	287.212	332.841	244.629	245.521	237.939	310.375	223.344	269.884	277.26	291.806	266.171	294.4	276.092	210.734	218.917	198.692	172.379	270.25	182.876	194.801	264.639	289.509	263.177	207.671	199.279	176.582	387.905	168.473	138.588	299.027	267.199	220.84
384	344.344	314.469	241.757	192.193	231.407	321.769	217.728	340.759	356.786	306.854	236.942	257.197	337.561	195.107	263.767	285.312	265.817	284.409	333.594	245.47	242.317	239.653	314.028	221.971	269.363	277.237	290.826	269.892	297.715	273.41	211.236	222.024	199.14	174.097	270.745	182.657	194.317	266.809	290.054	263.595	207.6	201.686	176.808	385.434	168.679	138.957	298.417	268.139	220.396
385	345.948	317.673	241.705	186.323	232.654	321.229	220.997	338.899	357.88	305.678	240.676	255.729	335.878	195.045	268.051	289.024	264.799	281.785	334.241	246.667	241.246	241.542	315.015	220.551	268.843	278.28	289.839	273.197	301.564	270.693	211.492	224.593	199.868	176.085	271.419	182.435	193.632	268.801	290.567	264.031	207.484	203.79	177.149	382.799	168.839	139.326	297.818	269.174	219.827
386	343.819	319.276	243.253	180.133	233.58	319.622	224.202	336.942	358.548	302.367	242.275	254.25	338.464	194.594	264.327	291.135	263.881	278.686	335.208	248.326	240.179	243.644	320.803	218.936	268.856	278.791	288.853	276.325	304.665	268.118	212.445	226.631	200.906	178.346	272.252	182.222	192.689	270.508	290.641	264.339	207.367	205.612	177.572	380.123	168.945	139.491	297.235	270.429	219.101
387	346.491	320.878	245.871	173.836	235.041	318.015	226.83	334.971	359.963	300.658	242.273	252.704	337.848	194.386	269.146	288.977	263.07	275.291	336.282	250.519	240.71	245.95	321.255	217.175	268.338	279.302	287.834	279.215	307.873	265.651	213.399	224.932	202.308	180.887	273.225	182.026	191.465	272.037	290.808	264.499	207.32	207.098	178.067	377.037	168.988	139.532	296.647	271.841	217.999
388	345.962	320.881	242.084	167.646	235.967	314.807	229.16	332.986	360.951	300.55	242.804	251.255	337.766	194.906	267.026	289.488	262.366	272.37	337.568	252.925	238.573	248.314	321.708	215.269	270.485	277.678	286.772	281.69	310.335	262.969	214.311	226.435	203.88	183.729	274.317	181.847	190.001	273.388	290.851	264.585	207.273	208.23	178.635	373.745	168.973	139.614	295.99	273.472	216.582
389	344.898	318.751	241.498	161.029	237.641	311.598	230.977	331.038	361.406	299.907	244.937	250.058	338.753	195.329	267.572	295.336	261.756	269.152	338.535	255.758	238.572	250.64	325.895	213.072	271.566	273.92	285.641	284.047	313.222	260.394	215.716	228.472	205.675	186.874	275.502	181.69	188.363	274.241	290.516	264.654	207.11	208.974	179.249	370.166	168.87	139.86	295.276	274.978	214.726
390	343.836	316.617	241.446	154.412	238.675	307.855	232.345	329.122	362.18	295.531	244.401	248.949	336.537	196.286	269.187	298.515	261.196	265.876	340.142	259.019	237.502	252.858	327.948	210.923	269.981	274.428	284.441	286.344	315.043	258.211	217.121	232.644	207.64	190.297	276.751	181.556	186.632	274.916	290.307	264.501	206.738	209.325	179.919	366.053	168.706	140.271	294.536	276.515	212.776
391	343.842	313.419	243.528	147.796	239.815	306.781	233.458	327.272	363.168	301.293	243.866	247.829	336.989	197.485	265.465	299.559	260.718	262.421	341.962	262.493	236.967	254.912	333.736	208.726	269.994	276.54	283.153	288.167	316.223	256.099	218.567	236.283	209.492	193.974	278.022	181.443	184.882	275.556	290.224	264.348	206.435	209.283	180.675	361.529	168.507	140.599	293.736	278.303	210.417
392	340.109	309.685	244.011	142.032	239.994	311.047	234.763	325.477	363.943	306.521	247.066	246.768	331.572	199.46	263.344	301.136	260.366	258.967	342.929	266.251	236.964	256.82	334.189	207.014	267.338	277.05	281.846	290.168	317.404	254.094	219.767	236.719	211.344	197.88	279.289	181.343	183.178	275.983	290.329	263.92	206.017	208.83	181.52	356.801	168.262	140.887	292.894	279.998	207.556
393	336.912	304.884	242.891	136.27	240.173	302.5	236.046	323.784	365.038	301.611	248.665	245.63	330.955	201.678	267.626	303.783	260.126	255.571	343.789	270.116	236.429	258.631	334.107	205.302	269.487	278.63	280.533	291.753	319.011	252.088	221.295	236.622	213.393	201.982	280.506	181.248	181.55	276.124	290.371	263.399	205.691	207.979	182.45	351.949	167.973	141.092	292.033	281.723	204.727
394	334.248	302.217	242.84	130.506	240.246	299.294	237.351	322.189	365.812	301.502	248.129	244.374	326.603	204.235	266.039	306.961	259.993	252.057	344.649	274.23	235.893	260.181	334.025	203.687	268.434	279.14	279.232	293.161	320.618	250.332	222.905	235.99	215.469	206.26	281.635	181.136	180.011	276.017	290.32	262.86	205.343	206.718	183.415	347.261	167.691	141.133	291.138	283.48	201.772
395	332.652	299.551	242.788	125.704	240.746	295.55	238.677	320.737	366.053	301.395	247.595	243.158	324.387	207.036	264.985	310.14	259.955	248.84	344.548	278.594	235.358	261.332	335.546	202.266	267.379	280.183	277.887	294.451	322.652	248.504	224.638	238.028	217.462	210.692	282.645	180.987	178.549	275.518	290.299	262.174	204.994	205.13	184.401	342.368	167.436	141.01	290.163	284.641	198.911
396	331.588	296.352	242.736	121.435	241.246	293.409	239.854	319.439	366.615	301.822	249.194	242.097	323.771	209.642	267.135	308.515	260.035	245.8	344.555	282.993	236.422	262.163	339.733	200.991	267.393	277.492	276.499	294.91	325.007	246.926	226.29	238.997	219.539	215.255	283.496	180.791	177.146	274.948	290.31	261.432	204.645	203.195	185.361	337.352	167.158	140.969	289.099	285.864	196.208
397	330.528	288.349	242.685	116.847	240.998	293.936	240.667	318.359	366.856	302.245	250.26	241.152	322.623	212.733	270.352	309.027	260.179	242.939	344.668	287.462	235.354	262.587	341.252	200.007	269.542	276.4	275.079	295.31	327.147	245.525	228.023	242.102	221.672	219.917	284.158	180.513	175.784	273.986	290.289	260.525	204.157	200.95	186.283	332.501	166.893	140.887	288.002	286.868	193.441
398	325.194	283.547	244.768	113.645	240.11	292.865	241.353	317.506	366.563	305.873	248.121	240.343	322.541	215.484	270.365	311.672	260.385	240.611	344.46	291.933	235.351	262.554	338.502	199.217	269.022	277.447	273.646	295.057	328.754	244.658	229.469	242.538	223.552	224.626	284.598	180.133	174.449	272.99	290.425	259.599	203.762	198.436	187.166	327.567	166.644	140.804	286.911	287.494	190.989
399	325.733	279.28	244.184	111.725	238.901	288.053	242.167	316.876	366.484	312.17	248.654	239.583	320.859	217.848	271.445	312.183	260.648	238.994	343.826	296.545	232.68	262.221	338.42	198.233	269.036	277.423	272.201	294.152	329.827	243.969	230.792	242.975	225.376	229.33	284.795	179.647	173.125	271.993	290.279	258.545	203.344	195.759	188.041	322.51	166.361	140.804	285.819	287.713	188.505
400	318.799	271.812	244.665	109.911	237.48	290.717	243.195	316.469	366.832	312.061	247.585	238.774	323.444	220.551	268.791	313.76	261.011	237.911	342.872	300.766	234.813	261.655	336.738	197.491	266.915	282.735	270.794	293.129	330.688	243.672	232.115	247.681	227.228	233.979	284.723	179.057	171.817	271.067	289.819	257.454	202.809	192.975	188.921	317.576	165.981	140.681	284.755	287.43	186.366
401	318.803	266.477	243.011	108.951	235.951	290.178	244.521	316.321	366.859	315.69	244.915	237.956	319.626	223.06	270.407	311.067	261.418	236.888	341.063	304.738	235.88	260.807	337.725	196.652	264.26	283.78	269.462	291.394	331.334	243.659	233.479	248.649	229.024	238.524	284.372	178.36	170.537	270.568	289.359	256.363	202.414	190.169	189.821	312.847	165.542	140.517	283.738	286.738	184.353
402	317.743	262.744	239.758	108.952	235.49	286.969	246.338	316.392	366.353	315.049	244.912	237.195	323.815	225.569	272.02	310.512	261.869	236.339	338.614	308.283	233.744	259.785	342.446	196.153	261.605	281.087	268.18	289.599	332.194	243.93	234.31	248.551	230.511	242.921	283.734	177.589	169.274	270.389	288.993	255.235	202.089	187.396	190.73	308.324	165.037	140.23	282.739	285.638	182.278
403	316.678	255.808	242.374	109.486	236.31	284.828	248.433	316.676	366.487	313.873	243.844	236.493	326.402	227.302	272.034	314.223	262.396	236.383	335.739	311.543	234.808	258.598	337.561	195.509	261.62	280.532	266.948	287.212	332.841	244.629	235.181	247.388	231.885	247.153	282.816	176.773	168.007	270.317	289.067	254.107	201.879	184.657	191.669	304.211	164.463	139.778	281.732	284.036	180.076
404	313.481	253.141	241.256	111.301	238.197	283.22	250.528	317.179	366.515	311.097	243.841	235.937	329.522	228.695	275.25	314.734	263.01	236.723	332.863	314.269	236.942	257.197	335.878	195.107	263.767	285.312	265.817	284.409	333.594	245.47	236.175	248.891	233.316	251.192	281.628	175.936	166.717	270.388	289.14	253.015	201.461	181.964	192.625	300.262	163.809	139.244	280.719	282.026	178.188
405	311.884	249.409	244.405	113.97	239.871	280.012	252.686	317.908	366.009	306.718	243.84	235.555	332.11	229.7	279.533	314.176	263.718	237.597	329.88	316.605	240.676	255.729	338.464	195.045	268.051	289.024	264.799	281.785	334.241	246.667	237.334	246.66	234.578	255.005	280.185	175.096	165.361	270.53	289.559	251.924	201.019	179.292	193.56	296.806	163.139	138.546	279.711	279.545	176.709
406	309.753	243.54	245.422	117.494	242.078	279.471	254.866	318.842	365.289	307.145	246.504	235.231	332.028	230.365	280.08	315.221	264.54	238.531	326.684	318.62	242.275	254.25	337.848	194.594	264.327	291.135	263.881	278.686	335.208	248.326	238.575	244.426	235.503	258.566	278.511	174.305	163.907	270.564	290.229	250.741	200.786	176.699	194.504	293.432	162.467	137.848	278.729	276.844	175.324
407	308.692	238.205	241.102	121.977	243.965	278.4	257.089	319.985	365.21	306.503	243.302	234.898	338.349	230.788	283.831	312.531	265.543	239.82	323.595	320.03	242.273	252.704	337.766	194.386	269.146	288.977	263.07	275.291	336.282	250.519	239.446	241.126	236.625	261.848	276.627	173.598	162.362	270.741	290.931	249.576	200.554	174.23	195.46	290.305	161.763	137.109	277.77	273.954	174.095
408	308.697	235.541	242.116	126.781	245.852	277.326	259.397	321.299	364.81	307.995	241.699	234.613	338.803	230.629	287.046	311.974	266.666	240.753	320.292	320.693	242.804	251.255	338.753	194.906	267.026	289.488	262.366	272.37	337.568	252.925	240.441	233.559	237.887	264.814	274.554	173.017	160.767	270.812	291.57	248.503	200.321	171.946	196.356	287.67	161.082	136.658	276.891	270.751	173.369
409	307.634	231.272	243.132	131.479	246.565	274.651	261.79	322.776	364.517	307.355	238.495	234.396	338.187	230.373	290.795	310.349	267.902	241.746	316.883	320.68	244.937	250.058	336.537	195.329	267.572	295.336	261.756	269.152	338.535	255.758	241.6	230.791	238.981	267.434	272.317	172.594	159.187	270.847	292.303	247.486	200.111	169.865	197.214	285.445	160.424	136.329	276.114	267.391	172.863
410	307.638	231.275	237.744	136.71	247.812	275.714	264.291	324.406	364.438	307.246	240.095	234.238	341.307	229.776	294.546	309.792	269.257	243.095	313.26	319.564	244.401	248.949	336.989	196.286	269.187	298.515	261.196	265.876	340.142	259.019	242.84	229.626	240.243	269.704	269.948	172.343	157.711	271.237	293.035	246.597	199.948	168.047	198.046	283.467	159.772	136.083	275.447	263.748	172.546
411	307.643	225.939	235.558	142.261	249.059	272.504	266.876	326.199	364.252	309.272	235.289	234.147	343.895	228.307	297.228	306.031	270.751	244.621	310.277	318.163	243.866	247.829	331.572	197.485	265.465	299.559	260.718	262.421	341.962	262.493	244.204	225.793	241.533	271.61	267.461	172.239	156.41	271.592	293.862	245.524	199.878	166.544	198.823	281.858	159.142	136.042	274.875	259.949	172.228
412	307.113	226.476	234.439	147.278	250.733	274.633	269.184	328.102	363.532	309.698	232.618	234.173	345.947	226.498	298.842	301.207	272.395	246.029	307.081	316.194	247.066	246.768	330.955	199.46	263.344	301.136	260.366	258.967	342.929	266.251	245.732	219.293	242.571	273.142	264.882	172.257	155.325	272.09	294.784	244.507	199.831	165.373	199.544	280.496	158.572	135.755	274.375	256.494	171.847
413	306.05	222.21	231.717	152.723	252.727	272.492	271.279	330.15	363.239	309.055	229.948	234.267	343.732	224.301	300.99	297.982	274.221	247.318	303.992	313.512	248.665	245.63	326.603	201.678	267.626	303.783	260.126	255.571	343.789	270.116	247.137	217.06	243.58	274.295	262.227	172.358	154.452	272.658	295.83	243.507	199.738	164.572	200.291	279.463	158.02	135.549	273.912	253.134	171.624
414	305.521	219.542	229.531	158.487	254.4	273.555	273.288	332.272	363.374	313.219	231.014	234.37	346.851	221.473	303.672	296.357	276.267	248.845	301.01	310.084	248.129	244.374	324.387	204.235	266.039	306.961	259.993	252.057	344.649	274.23	248.789	216.428	244.645	275.066	259.508	172.52	153.754	273.156	296.689	242.545	199.829	164.176	201.059	278.716	157.467	135.344	273.467	249.68	171.525
415	306.594	216.878	228.945	163.399	256.608	271.946	275.17	334.445	363.294	312.577	227.277	234.473	348.903	218.451	302.085	295.8	278.538	250.015	298.774	306.584	247.595	243.158	323.771	207.036	264.985	310.14	259.955	248.84	344.548	278.594	250.522	208.325	245.936	275.448	256.736	172.728	153.165	273.404	297.453	241.693	200.2	164.246	201.857	278.462	156.898	135.139	273.039	246.32	171.522
416	306.063	216.881	225.692	167.562	258.708	270.34	276.838	336.576	363.002	310.867	227.276	234.586	349.889	215.284	302.634	292.574	281.03	250.771	295.471	302.693	249.194	242.097	322.623	209.642	267.135	308.515	260.035	245.8	344.555	282.993	252.337	205.56	247.142	275.452	253.921	172.976	152.619	273.225	297.935	240.915	200.733	164.743	202.681	278.455	156.283	135.098	272.645	242.96	171.675
417	306.069	215.814	222.439	171.939	261.022	269.264	278.548	338.656	362.282	315.03	226.739	234.728	350.34	211.728	305.849	287.749	283.685	251.704	292.275	298.553	250.26	241.152	322.541	212.733	270.352	309.027	260.179	242.939	344.668	287.462	253.989	201.192	248.601	275.096	251.069	173.237	152.049	272.691	298.95	240.137	201.104	165.644	203.492	278.899	155.612	134.729	272.291	239.662	171.859
418	306.073	215.284	219.718	175.356	262.803	273.53	280.131	340.62	360.495	315.988	221.399	234.851	350.26	208.124	307.463	285.057	286.541	252.638	289.719	294.306	248.121	240.343	320.859	215.484	270.365	311.672	260.385	240.611	344.46	291.933	255.352	199.493	250.144	274.407	248.183	173.488	151.401	271.943	299.934	239.321	201.451	166.916	204.26	279.548	154.891	134.359	272.007	236.585	172.326
419	306.077	214.217	219.134	177.064	265.117	272.456	281.521	342.459	357.641	318.548	221.931	234.877	349.11	204.52	306.944	280.23	289.56	253.868	287.697	289.988	248.654	239.583	323.444	217.848	271.445	312.183	260.648	238.994	343.826	296.545	256.347	196.728	251.855	273.416	245.264	173.708	150.629	270.946	300.95	238.69	201.729	168.52	204.986	280.608	154.186	134.318	271.856	233.884	172.887
420	305.015	211.017	213.211	178.132	266.898	272.449	282.527	344.103	354.253	317.908	218.728	234.796	348.494	200.819	307.491	274.869	292.711	255.038	285.142	285.74	247.585	238.774	319.626	220.551	268.791	313.76	261.011	237.911	342.872	300.766	257.998	190.76	253.454	272.156	242.322	173.89	149.69	269.842	302.028	238.188	202.146	170.371	205.665	281.955	153.532	134.195	271.833	231.434	173.637
421	307.155	213.155	212.625	178.56	268.571	271.377	283.341	345.506	350.331	317.265	217.657	234.657	350.549	197.214	307.505	272.713	295.969	256.031	283.12	281.173	244.915	237.956	323.815	223.06	270.407	311.067	261.418	236.888	341.063	304.738	259.157	186.392	255.278	270.656	239.355	174.03	148.55	268.774	303.106	237.833	202.539	172.435	206.33	283.426	152.913	133.949	271.888	229.047	174.261
422	306.091	212.623	206.704	178.241	270.031	274.039	283.877	346.686	345.982	319.293	214.988	234.44	351.535	194.095	307.518	266.818	299.308	257.083	280.991	276.856	244.912	237.195	326.402	225.569	272.02	310.512	261.869	236.339	338.614	308.283	259.781	182.025	257.496	268.936	236.377	174.145	147.189	267.421	303.871	237.588	203.003	174.685	207.026	285.142	152.304	133.826	272.029	226.943	175.042
423	310.365	214.227	205.585	177.708	271.598	275.1	284.2	347.624	342.701	320.252	213.918	234.175	349.851	191.316	310.201	259.857	302.679	257.72	278.756	272.715	243.844	236.493	329.522	227.302	272.034	314.223	262.396	236.383	335.739	311.543	260.242	179.793	259.488	267.02	233.389	174.244	145.597	265.962	304.447	237.307	203.466	177.109	207.735	287.023	151.759	133.785	272.224	224.932	175.917
424	310.37	212.094	204.465	176.748	273.592	274.027	284.266	348.303	338.352	325.48	211.248	233.948	347.635	188.197	310.748	253.429	305.993	258.594	276.628	268.931	243.841	235.937	332.11	228.695	275.25	314.734	263.01	236.723	332.863	314.269	260.457	175.427	261.312	264.936	230.409	174.328	143.798	264.68	304.96	237.191	203.79	179.628	208.43	289.11	151.194	133.579	272.447	223.33	176.666
425	309.84	214.231	200.144	175.361	275.8	274.553	284.183	348.726	334.43	323.771	209.112	233.77	344.885	186.291	309.695	251.805	309.238	259.349	274.712	265.929	243.84	235.555	332.028	229.7	279.533	314.176	263.718	237.597	329.88	316.605	260.301	174.795	263.22	262.699	227.446	174.396	141.845	263.043	305.316	237.093	204.184	182.164	209.105	291.483	150.573	133.621	272.702	221.885	177.604
426	310.38	215.303	200.093	173.334	277.793	270.278	283.652	348.941	331.256	327.399	206.975	233.573	344.803	184.628	308.64	246.979	312.389	260.757	273.118	263.141	246.504	235.231	338.349	230.365	280.08	315.221	264.54	238.531	326.684	318.62	260.188	169.362	265.044	260.32	224.52	174.432	139.806	261.548	305.452	237.106	204.671	184.689	209.706	294.185	149.97	133.826	273.044	220.534	178.636
427	310.918	214.236	200.041	170.346	279.681	269.204	282.8	348.877	328.295	332.094	208.041	233.346	344.188	183.595	304.919	243.221	315.439	261.75	272.057	260.709	243.302	234.898	338.803	230.788	283.831	312.531	265.543	239.82	323.595	320.03	259.499	168.73	266.784	257.83	221.635	174.438	137.759	260.052	305.463	237.138	205.227	187.169	210.223	297.133	149.406	134.113	273.466	219.497	179.543
428	309.854	218.51	203.19	166.397	281.141	269.733	281.629	348.53	324.479	338.391	205.368	233.071	341.973	183.096	306.534	238.394	318.352	262.802	270.675	258.988	241.699	234.613	338.187	230.629	287.046	311.974	266.666	240.753	320.292	320.693	258.687	168.632	268.748	255.257	218.811	174.414	135.79	258.486	305.223	237.298	205.899	189.571	210.602	299.999	148.839	134.113	273.959	218.617	180.481
429	310.393	217.444	201.003	162.663	282.174	268.659	280.094	347.904	322.372	341.484	203.767	232.728	336.553	182.936	305.479	238.904	321.145	263.558	269.08	257.765	238.495	234.396	341.307	230.373	290.795	310.349	267.902	241.746	316.883	320.68	257.424	164.798	270.488	252.624	216.051	174.357	133.964	257.062	304.794	237.477	206.525	191.91	210.888	302.988	148.28	134.154	274.514	217.832	181.795
430	311.464	217.446	204.688	159.141	282.354	268.653	278.133	347.019	319.732	349.915	200.562	232.376	331.134	183.456	305.493	230.876	323.768	264.728	267.699	256.898	240.095	234.238	343.895	229.776	294.546	309.792	269.257	243.095	313.26	319.564	256.037	167.902	272.284	249.971	213.37	174.263	132.339	255.887	304.303	237.545	207.174	194.171	211.101	306.06	147.75	134.483	275.144	217.202	182.921
431	309.868	220.117	206.237	155.192	282.96	267.578	275.936	345.883	316.771	358.881	197.359	232.023	330.52	184.607	301.238	224.981	326.159	265.603	266.423	256.245	235.289	234.147	345.947	228.307	297.228	306.031	270.751	244.621	310.277	318.163	254.651	163.003	274.473	247.336	210.778	174.131	130.939	255.104	303.843	237.687	207.823	196.303	211.238	309.008	147.225	134.975	275.797	216.825	184.048
432	307.74	220.653	206.721	151.671	283.246	267.039	273.398	344.511	314.557	360.374	193.087	231.67	328.835	186.291	298.583	220.156	328.268	266.536	265.682	255.84	232.618	234.173	343.732	226.498	298.842	301.207	272.395	246.029	307.081	316.194	253.059	165.04	276.662	244.732	208.293	173.952	129.781	254.641	303.508	237.884	208.518	198.227	211.272	311.915	146.684	134.852	276.48	216.541	185.425
433	309.878	223.324	210.403	147.936	283.533	265.433	270.562	342.86	312.77	366.67	187.214	231.395	322.884	188.266	293.793	219.599	330.075	267.232	264.941	255.792	229.948	234.267	346.851	224.301	300.99	297.982	274.221	247.318	303.992	313.512	251.015	163.874	278.598	242.159	205.934	173.726	128.869	254.533	303.331	238.081	209.214	199.87	211.25	314.987	146.113	135.139	277.164	216.195	186.959
434	309.35	224.393	212.487	144.094	282.965	262.223	267.469	340.939	310.235	369.762	187.212	231.178	320.136	190.581	295.409	213.704	331.594	267.988	263.453	256.099	231.014	234.37	348.903	221.473	303.672	296.357	276.267	248.845	301.01	310.084	248.849	163.244	280.198	239.619	203.721	173.454	128.197	254.71	302.682	238.37	209.909	201.17	211.13	318.058	145.618	135.303	277.818	216.1	188.588
435	310.955	223.328	215.104	140.466	283.037	261.149	264.077	338.778	307.915	369.123	187.745	230.942	315.783	193.478	294.889	211.013	332.798	268.269	262.605	256.513	227.277	234.473	349.889	218.451	302.085	295.8	278.538	250.015	298.774	306.584	246.887	161.545	281.516	237.094	201.671	173.142	127.752	255.208	301.94	238.714	210.651	202.144	210.878	320.924	145.207	135.139	278.403	216.161	190.059
436	310.96	228.668	217.186	137.371	282.79	260.61	260.408	336.384	306.128	374.884	185.609	230.773	315.166	196.375	290.098	209.389	333.683	268.787	261.651	257.283	227.276	234.586	350.34	215.284	302.634	292.574	281.03	250.771	295.471	302.693	244.639	163.049	282.75	234.573	199.796	172.786	127.558	256.096	300.914	239.095	211.393	202.765	210.524	323.749	144.863	135.098	278.927	216.035	191.782
437	312.031	231.874	221.937	134.169	282.756	260.604	256.333	333.847	304.021	380.113	184.005	230.605	312.417	199.515	289.581	205.63	334.272	269.069	260.056	258.159	226.739	234.728	350.26	211.728	305.849	287.749	283.685	251.704	292.275	298.553	242.759	163.484	283.675	232.055	198.107	172.407	127.645	257.483	299.387	239.403	211.949	203.015	210.118	326.533	144.596	134.975	279.373	216.065	193.536
438	312.57	232.941	222.419	131.396	282.615	260.597	251.959	331.254	301.486	380.54	184.004	230.427	309.667	202.752	284.257	202.405	334.566	269.231	258.674	259.356	221.399	234.851	349.11	208.124	307.463	285.057	286.541	252.638	289.719	294.306	241.209	164.455	284.291	229.559	196.611	172.015	128.057	259.119	297.985	239.618	212.25	202.944	209.635	328.989	144.415	134.811	279.78	216.19	195.447
439	314.709	234.545	222.902	129.262	282.901	258.459	247.479	328.702	299.806	379.898	184.001	230.287	305.85	206.134	281.601	205.049	334.521	268.979	257.827	260.411	221.931	234.877	348.494	204.52	306.944	280.23	289.56	253.868	287.697	289.988	239.288	167.56	285.048	227.102	195.312	171.625	128.849	260.862	296.615	239.834	212.319	202.571	209.045	331.239	144.232	134.565	280.123	216.095	197.17
440	315.782	239.351	228.72	127.021	283.08	254.715	243.127	326.207	298.233	380.857	185.601	230.362	303.633	209.856	279.48	205.56	334.112	269.082	256.232	261.287	218.728	234.796	350.549	200.819	307.491	274.869	292.711	255.038	285.142	285.74	237.655	169.062	285.664	224.699	194.218	171.243	130.067	263.031	294.993	239.976	212.457	201.894	208.328	333.161	144.05	134.359	280.412	216.282	198.956
441	316.319	239.353	231.87	125.848	283.046	255.244	238.86	323.808	296.339	379.148	182.396	230.572	300.885	213.53	278.426	205.003	333.414	268.948	254.637	262.27	217.657	234.657	351.535	197.214	307.505	272.713	295.969	256.031	283.12	281.173	235.981	170.031	285.887	222.364	193.332	170.898	131.703	265.45	293.152	240.117	212.48	200.935	207.474	334.878	143.88	134.359	280.645	216.281	200.741
442	315.257	242.025	236.623	124.995	282.478	256.304	234.956	321.526	295.512	375.302	183.996	230.976	300.269	217.3	278.439	205.514	332.402	269.051	253.149	263.289	214.988	234.44	349.851	194.095	307.518	266.818	299.308	257.083	280.991	276.856	234.554	170.468	286.138	220.101	192.658	170.582	133.726	268.225	291.216	240.241	212.572	199.77	206.513	336.348	143.669	134.113	280.804	216.311	202.464
443	316.863	244.695	240.305	124.996	281.911	258.434	231.308	319.392	295.326	372.527	183.994	231.545	294.848	220.586	274.719	203.357	331.013	269.095	252.087	264.13	213.918	234.175	347.635	191.316	310.201	259.857	302.679	257.72	278.756	272.715	233.372	173.573	286.445	217.902	192.2	170.295	136.066	271.035	289.344	240.327	212.618	198.441	205.505	337.778	143.465	133.62	280.843	216.404	204.124
444	318.468	247.9	242.924	124.677	281.449	258.96	227.788	317.435	294.927	367.617	185.594	232.24	293.166	223.822	273.664	204.401	329.242	268.546	251.452	265.22	211.248	233.948	344.885	188.197	310.748	253.429	305.993	258.594	276.628	268.931	231.945	172.409	286.668	215.755	191.96	170.027	138.623	273.774	287.282	240.396	212.594	197.005	204.523	339.166	143.287	133.128	280.805	216.466	205.815
445	319.006	251.106	245.541	124.998	280.775	256.286	224.503	315.668	294.954	363.238	184.524	233.042	294.686	226.477	272.077	204.378	327.106	267.523	251.566	265.776	209.112	233.77	344.803	186.291	309.695	251.805	309.238	259.349	274.712	265.929	230.517	174.98	286.554	213.651	191.932	169.783	141.303	276.548	285.253	240.427	212.663	195.452	203.592	340.349	143.119	132.799	280.678	216.496	207.821
446	319.012	254.308	246.557	125.212	281.061	255.214	221.667	314.073	295.088	362.597	190.927	234.009	293.002	229.326	269.957	207.023	324.562	266.618	251.785	266.155	206.975	233.573	344.188	184.628	308.64	246.979	312.389	260.757	273.118	263.141	229.254	177.551	286.383	211.571	192.119	169.546	144.043	279.358	283.129	240.311	212.592	193.78	202.733	341.286	142.902	132.471	280.46	216.558	209.732
447	318.481	255.378	248.638	125.533	281.347	255.74	219.343	312.654	295.116	354.483	189.323	235.112	293.987	232.077	271.039	208.068	321.591	265.594	252.325	266.32	208.041	233.346	341.973	183.595	304.919	243.221	315.439	261.75	272.057	260.709	228.154	179.587	286.157	209.508	192.516	169.313	146.774	282.062	280.942	240.287	212.476	191.985	201.892	341.935	142.719	132.225	280.153	216.588	211.863
448	324.356	260.717	250.188	125.747	281.313	256.268	217.68	311.439	295.784	350.106	195.191	236.447	294.441	234.587	273.187	206.442	318.225	264.452	252.972	266.271	205.368	233.071	336.553	183.096	306.534	238.394	318.352	262.802	270.675	258.988	227.096	181.089	285.79	207.457	193.118	169.069	149.451	284.445	278.693	240.153	212.336	189.999	201.059	342.461	142.567	132.225	279.817	216.462	213.994
449	324.362	261.787	253.34	127.455	281.92	257.329	216.808	310.368	296.879	344.127	194.123	238.016	297.027	236.95	274.801	208.554	314.507	262.658	253.405	265.866	203.767	232.728	331.134	182.936	305.479	238.904	321.145	263.558	269.08	257.765	226.079	182.06	285.17	205.41	193.922	168.773	152.052	286.721	276.223	239.945	212.034	187.817	200.218	342.988	142.39	131.855	279.396	216.398	215.999
450	325.967	263.925	257.557	129.484	281.886	258.924	216.554	309.464	298.08	344.018	197.323	239.72	300.68	238.925	274.282	211.732	310.413	260.982	253.945	265.249	200.562	232.376	330.52	183.456	305.493	230.876	323.768	264.728	267.699	256.898	225.144	181.429	284.382	203.374	194.927	168.39	154.542	288.357	274.099	239.646	211.731	185.488	199.389	343.308	142.167	131.486	278.855	216.491	217.879
451	326.505	262.86	252.168	132.047	281.638	259.986	216.877	308.741	300.029	339.642	198.923	241.424	300.6	240.319	276.43	213.845	305.891	258.714	255.338	264.418	197.359	232.023	328.835	184.607	301.238	224.981	326.159	265.603	266.423	256.245	224.291	183.467	283.284	201.369	196.123	167.917	156.889	289.601	271.693	239.364	211.359	183.058	198.62	343.547	141.935	130.87	278.21	216.553	219.57
452	328.645	263.395	252.65	135.356	281.177	267.45	217.626	308.209	302.084	334.731	201.588	243.216	297.85	241.712	282.848	212.22	301.005	256.089	256.732	263.373	193.087	231.67	322.884	186.291	298.583	220.156	328.268	266.536	265.682	255.84	223.438	185.505	282.271	199.414	197.508	167.356	159.095	290.526	269.349	239.175	210.894	180.527	197.945	343.54	141.681	129.844	277.519	216.646	221.23
453	329.719	263.932	255.266	139.733	281.356	267.443	218.76	307.825	303.82	326.616	204.256	244.979	302.037	242.232	283.396	213.264	295.856	253.464	258.873	262.043	187.214	231.395	320.136	188.266	293.793	219.599	330.075	267.232	264.941	255.792	222.708	187.009	281.23	197.522	199.067	166.72	161.174	291.059	267.1	238.93	210.546	177.923	197.364	343.491	141.375	128.694	276.759	216.77	222.796
454	331.324	263.934	258.416	144.537	280.895	266.371	220.215	307.612	305.342	323.307	206.921	246.683	303.024	242.315	288.745	220.179	290.455	250.958	261.12	260.785	187.212	231.178	315.783	190.581	295.409	213.704	331.594	267.988	263.453	256.099	222.184	189.578	280.301	195.713	200.791	166.053	163.143	291.343	265.164	238.63	210.197	175.296	196.899	343.278	141.029	127.504	275.955	216.769	224.173
455	331.329	262.87	256.23	149.448	281.181	268.501	221.925	307.544	307.291	321.065	207.453	248.31	307.211	241.961	296.765	222.291	284.872	247.919	263.582	259.385	187.745	230.942	315.166	193.478	294.889	211.013	332.798	268.269	262.605	256.513	221.783	191.616	279.317	193.997	202.662	165.386	165.05	290.986	262.915	238.349	209.802	172.664	196.557	343.148	140.644	126.724	275.143	216.799	225.456
456	329.732	260.201	258.314	154.252	280.613	265.824	223.87	307.675	309.239	320.422	209.052	249.928	310.865	241.365	299.447	223.334	279.208	244.939	265.402	257.521	185.609	230.773	312.417	196.375	290.098	209.389	333.683	268.787	261.651	257.283	221.299	193.654	278.275	192.38	204.663	164.727	166.946	289.989	260.665	238.03	209.43	170.06	196.275	342.812	140.278	125.944	274.303	217.112	226.771
457	333.47	259.673	257.195	159.483	280.152	269.555	226.221	307.978	311.722	312.31	209.584	251.409	313.452	240.09	302.663	224.912	273.5	241.543	267.65	255.552	184.005	230.605	309.667	199.515	289.581	205.63	334.272	269.069	260.056	258.159	220.857	196.758	277.15	190.851	206.77	164.095	168.857	288.53	258.918	237.804	208.942	167.484	196.078	342.353	139.893	125.123	273.411	217.174	227.928
458	336.68	259.141	257.143	163.753	278.624	269.014	229.042	308.424	314.311	310.066	213.319	252.725	318.707	238.232	305.345	227.024	267.722	238.385	269.471	253.297	184.004	230.427	305.85	202.752	284.257	202.405	334.566	269.231	258.674	259.356	220.538	198.262	275.772	189.396	208.963	163.535	170.787	286.75	257.171	237.707	208.454	165.015	196.014	342.222	139.453	124.301	272.463	217.11	229.086
459	335.081	258.076	259.227	167.49	277.736	271.679	232.225	309.005	317.754	305.688	213.849	253.867	323.962	235.987	313.899	230.203	261.945	234.812	271.932	250.509	184.001	230.287	303.633	206.134	281.601	205.049	334.521	268.979	257.827	260.411	220.3	201.899	274.225	188.008	211.208	163.078	172.748	284.508	255.612	237.665	207.966	162.625	196.086	341.968	139.001	123.193	271.473	217.078	230.149
460	336.689	254.875	258.107	171.653	276.848	275.407	236.22	309.703	320.877	303.447	214.381	254.776	330.284	232.819	316.046	228.579	256.249	231.298	273.859	247.934	185.601	230.362	300.885	209.856	279.48	205.56	334.112	269.082	256.232	261.287	220.104	202.335	272.454	186.667	213.48	162.768	174.723	281.91	254.084	237.641	207.548	160.318	196.291	341.796	138.573	122.002	270.434	216.794	231.338
461	331.888	253.809	258.589	176.137	275.853	274.333	240.79	310.46	324.854	303.338	214.913	255.403	334.473	229.555	319.262	230.692	250.704	228.14	276.854	245.644	182.396	230.572	300.269	213.53	278.426	205.003	333.414	268.948	254.637	262.27	219.867	202.237	270.654	185.357	215.758	162.636	176.711	278.849	252.745	237.635	207.129	158.062	196.658	341.583	138.103	120.812	269.342	216.699	232.339
462	331.893	251.145	256.936	180.407	275.178	275.395	245.617	311.278	328.083	304.296	215.444	255.856	337.594	226.193	323.546	229.601	245.322	225.397	278.995	243.496	183.996	230.976	294.848	217.3	278.439	205.514	332.402	269.051	253.149	263.289	220.041	200.54	268.714	184.079	218.021	162.683	178.722	275.326	251.532	237.74	206.966	155.919	197.131	341.042	137.647	119.785	268.185	216.416	233.089
463	334.033	249.012	260.087	184.571	275.144	273.255	250.38	312.198	331.526	304.189	217.578	256.163	344.45	222.104	325.161	235.448	240.135	222.476	281.029	241.491	183.994	231.545	293.166	220.586	274.719	203.357	331.013	269.095	252.087	264.13	220.009	203.11	266.915	182.836	220.25	162.869	180.794	271.483	250.506	237.882	206.896	153.838	197.665	340.665	137.257	118.718	267.007	216.257	233.65
464	335.639	249.014	260.035	188.734	274.79	275.384	255.186	313.202	334.436	302.48	215.441	256.344	348.637	217.917	330.511	240.227	235.211	219.555	282.849	239.699	185.594	232.24	294.686	223.822	273.664	204.401	329.242	268.546	251.452	265.22	219.566	202.48	265.059	181.617	222.438	163.172	182.958	267.462	249.67	238.042	207.081	151.902	198.305	340.37	136.895	117.733	265.814	216.037	233.928
465	334.576	246.881	256.246	192.257	273.902	276.444	259.33	314.284	337.986	306.641	212.772	256.438	352.826	213.634	333.727	241.805	230.589	216.515	284.777	237.836	184.524	233.042	293.002	226.477	272.077	204.378	327.106	267.523	251.566	265.776	219.575	206.119	262.978	180.425	224.572	163.548	185.252	263.689	248.958	238.239	207.243	150.113	199.09	340.075	136.56	116.83	264.614	215.941	234.207
466	335.113	245.284	259.931	195.354	273.654	278.574	263.048	315.45	340.788	305.999	212.77	256.473	359.147	209.254	338.011	240.715	226.243	213.653	285.424	235.972	190.927	234.009	293.987	229.326	269.957	207.023	324.562	266.618	251.785	266.155	219.461	209.222	260.617	179.257	226.645	163.957	187.701	259.917	248.31	238.547	207.335	148.537	199.999	339.904	136.24	116.009	263.435	215.846	234.297
467	333.517	244.219	259.345	197.703	273.193	280.7	266.381	316.704	344.338	309.094	214.902	256.411	360.133	204.68	343.361	241.226	222.28	211.029	287.137	234.252	189.323	235.112	294.441	232.077	271.039	208.068	321.591	265.594	252.325	266.32	219.306	208.59	258.284	178.099	228.645	164.382	190.334	255.967	247.661	238.983	207.473	147.219	201.045	339.732	135.867	115.393	262.293	215.563	234.199
468	332.454	243.153	257.692	200.052	272.839	280.162	269.692	318.033	347.461	312.188	218.637	256.262	367.523	200.154	343.375	240.669	218.757	208.997	289.065	232.673	195.191	236.447	297.027	234.587	273.187	206.442	318.225	264.452	252.972	266.271	219.028	212.764	256.175	176.944	230.564	164.807	193.166	252.266	247.641	239.566	207.426	146.205	202.185	339.272	135.476	114.654	261.148	215.373	234.164
469	330.859	242.088	254.973	201.76	271.951	279.621	272.747	319.458	350.584	314.748	217.033	256.104	372.244	195.434	347.658	242.246	215.611	207.5	290.245	231.13	194.123	238.016	300.68	236.95	274.801	208.554	314.507	262.658	253.405	265.866	218.544	215.333	253.702	175.792	232.401	165.174	196.217	248.565	247.369	240.297	207.518	145.449	203.346	338.854	135.118	114.038	259.968	215.058	233.972
470	331.397	240.489	255.989	202.935	271.81	278.549	275.781	321.033	352.959	316.774	214.897	255.955	374.299	190.81	348.205	241.689	212.797	205.883	290.891	229.836	197.323	239.72	300.6	238.925	274.282	211.732	310.413	260.982	253.945	265.249	218.553	217.372	251.369	174.643	234.155	165.439	199.513	245.327	247.223	241.175	207.819	145.07	204.486	338.518	134.796	113.258	258.756	214.775	233.434
471	332.469	238.891	255.404	203.684	271.029	276.941	278.538	322.76	355.442	316.667	217.03	255.825	377.419	186.333	349.819	240.065	210.328	204.326	292.285	228.898	198.923	241.424	297.85	240.319	276.43	213.845	305.891	258.714	255.338	264.418	218.562	219.942	248.895	173.505	235.828	165.591	203.074	242.195	246.951	242.255	208.166	145.1	205.57	338.141	134.496	112.355	257.492	214.585	232.803
472	329.806	238.892	254.818	204.432	270.141	276.402	281.145	324.659	357.178	318.159	217.028	255.734	377.871	181.953	350.368	237.908	208.148	203.184	293.145	228.067	201.588	243.216	302.037	241.712	282.848	212.22	301.005	256.089	256.732	263.373	218.613	221.445	246.309	172.387	237.429	165.605	206.891	239.17	247.056	243.391	208.537	145.552	206.594	337.764	134.252	111.821	256.173	214.364	232.139
473	332.478	240.496	255.3	204.646	268.826	280.132	283.154	326.707	358.486	316.985	220.76	255.624	377.789	177.039	353.05	241.087	206.251	202.873	293.471	227.698	204.256	244.979	303.024	242.232	283.396	213.264	295.856	253.464	258.873	262.043	219.032	220.28	243.442	171.3	238.97	165.47	210.93	236.501	246.91	244.692	208.931	146.381	207.606	337.551	134.037	111.164	254.828	214.081	231.476
474	330.882	243.167	254.714	204.861	268.472	280.125	284.779	328.899	359.474	317.41	223.961	255.417	378.776	172.27	350.929	243.198	204.63	203.213	294.652	227.507	206.921	246.683	307.211	242.315	288.745	220.179	290.455	250.958	261.12	260.785	219.37	220.717	240.435	170.251	240.452	165.216	215.129	234.401	246.764	246.104	209.487	147.614	208.609	337.749	133.861	110.425	253.527	213.829	230.845
475	328.218	246.37	250.394	205.182	268.011	279.585	286.063	331.141	360.783	316.234	223.426	255.151	377.626	167.696	351.476	242.107	203.317	204.562	296.046	227.281	207.453	248.31	310.865	241.961	296.765	222.291	284.872	247.919	263.582	259.385	219.79	222.753	237.484	169.236	241.886	164.87	219.394	232.834	246.932	247.773	209.927	149.1	209.586	338.111	133.68	109.604	252.258	213.671	230.275
476	329.824	251.71	252.475	205.503	267.656	278.512	287.197	333.407	361.13	316.661	224.491	254.857	377.544	163.315	352.558	239.417	202.268	206.207	297.226	226.805	209.052	249.928	313.452	241.365	299.447	223.334	279.208	244.939	265.402	257.521	220.374	224.257	234.729	168.25	243.265	164.441	223.616	231.766	247.225	249.424	210.321	150.838	210.53	338.35	133.526	108.701	251.036	213.544	229.487
477	329.828	251.18	252.957	205.717	267.943	279.573	287.882	335.622	361.372	316.018	223.423	254.543	376.929	158.886	352.038	236.192	201.45	208.089	298.62	226.294	209.584	251.409	318.707	240.09	302.663	224.912	273.5	241.543	267.65	255.552	221.286	228.963	231.89	167.289	244.598	163.945	227.696	231.232	247.613	251.112	210.668	152.722	211.413	338.589	133.416	107.962	249.856	213.574	228.572
478	325.028	253.316	250.238	205.611	269.083	277.432	288.354	337.832	361.719	318.046	219.684	254.21	376.313	154.845	352.051	236.7	200.815	209.793	299.48	225.996	213.319	252.725	323.962	238.232	305.345	227.024	267.722	238.385	269.471	253.297	222.034	229.399	229.361	166.344	245.883	163.405	231.551	231.409	247.906	252.836	211.062	154.821	212.245	338.951	133.329	107.387	248.701	213.322	227.752
479	328.769	257.055	252.32	205.078	269.049	274.224	288.378	339.973	361.747	317.938	223.419	254.002	378.366	150.999	350.464	236.676	200.375	212.446	299.913	225.592	213.849	253.867	330.284	235.987	313.899	230.203	261.945	234.812	271.932	250.509	222.618	230.37	227.196	165.411	247.119	162.837	235.099	232.12	248.451	254.634	211.548	157.082	213.014	339.395	133.243	106.648	247.48	213.227	226.901
480	326.106	261.327	250.135	204.438	269.869	274.751	288.082	342.076	361.134	316.762	226.619	253.834	376.684	147.831	349.41	238.254	200.091	215.633	300.559	225.579	214.381	254.776	334.473	232.819	316.046	228.579	256.249	231.298	273.859	247.934	223.285	232.405	224.919	164.492	248.31	162.254	238.299	233.115	248.964	256.303	212.058	159.533	213.688	340.085	133.213	105.704	246.244	212.943	226.049
481	327.712	261.863	247.415	203.478	270.902	278.482	287.252	344.105	360.414	315.055	228.218	253.733	376.068	144.761	346.222	236.099	199.933	219.294	300.885	225.922	214.913	255.403	337.594	229.555	319.262	230.692	250.704	228.14	276.854	245.644	223.91	233.909	222.867	163.579	249.463	161.683	241.134	234.644	249.572	257.918	212.568	162.126	214.311	340.817	133.21	104.513	245.013	212.691	225.198
482	326.115	265.601	245.229	202.198	272.042	280.077	286.101	346.018	359.694	315.477	226.615	253.788	377.054	142.079	343.566	236.076	199.894	223.014	301.105	226.62	215.444	255.856	344.45	226.193	323.546	229.601	245.322	225.397	278.995	243.496	224.74	233.811	220.786	162.674	250.584	161.134	243.604	236.565	250.493	259.568	213.171	164.932	214.853	341.877	133.186	103.405	243.799	212.439	224.252
483	326.12	269.873	245.177	201.771	273.502	276.868	284.503	347.76	358.441	314.304	227.148	254.076	369.501	139.445	341.447	236.052	199.994	226.616	301.645	227.212	217.578	256.163	348.637	222.104	325.161	235.448	240.135	222.476	281.029	241.491	225.324	237.985	219.071	161.791	251.681	160.606	245.72	238.841	251.477	261.219	213.82	167.839	215.267	342.813	133.134	102.543	242.575	212.187	223.338
484	327.192	273.611	246.193	201.132	276.35	275.262	282.648	349.329	357.614	314.197	225.543	254.548	367.818	137.733	337.19	237.095	200.175	230.277	301.651	228.053	215.441	256.344	352.826	217.917	330.511	240.227	235.211	219.555	282.849	239.699	226.236	235.218	217.496	160.93	252.772	160.071	247.534	241.367	252.43	262.649	214.469	170.824	215.57	343.791	133.065	101.804	241.407	212.154	222.486
485	326.129	273.08	246.673	200.172	278.344	275.788	280.132	350.671	356.788	311.952	224.475	255.33	367.202	136.264	335.069	238.673	200.438	233.998	301.231	228.859	212.772	256.438	359.147	213.634	333.727	241.805	230.589	216.515	284.777	237.836	227.19	234.054	216.23	160.088	253.873	159.495	249.069	243.928	253.413	263.932	215.025	173.827	215.813	344.933	132.938	100.613	240.283	211.996	221.54
486	323.997	273.083	245.556	198.785	281.192	272.581	277.039	351.777	355.961	308.643	220.735	256.404	365.518	134.891	330.28	235.449	200.807	237.897	301.557	229.806	212.77	256.473	360.133	209.254	338.011	240.715	226.243	213.653	285.424	235.972	227.814	237.159	215.133	159.286	254.997	158.85	250.342	247.022	254.869	265.086	215.535	176.829	215.966	345.788	132.8	99.7513	239.182	211.932	220.626
487	323.469	272.018	248.171	197.825	285.214	270.439	273.476	352.655	354.921	306.4	221.268	257.72	363.837	133.665	327.091	235.96	201.29	242.329	300.922	230.932	214.902	256.411	367.523	204.68	343.361	241.226	222.28	211.029	287.137	234.252	228.604	235.459	214.12	158.513	256.167	158.132	251.383	250.615	256.292	265.964	215.766	179.736	216.09	346.437	132.649	98.7661	238.11	212.057	219.9
488	326.142	270.418	247.586	196.332	288.595	268.299	269.829	353.288	353.988	304.69	218.064	259.25	361.087	132.971	323.904	237.002	201.86	246.346	299.541	231.773	218.637	256.262	372.244	200.154	343.375	240.669	218.757	208.997	289.065	232.673	229.023	236.963	213.613	157.752	257.392	157.348	252.221	254.635	257.873	266.805	215.974	182.57	216.218	347.333	132.482	97.904	237.05	212.119	219.331
489	324.012	270.421	245.4	195.159	292.19	269.893	265.967	353.692	353.055	302.447	217.529	261.003	359.936	132.181	322.316	242.85	202.481	250.244	298.159	232.649	217.033	256.104	374.299	195.434	347.658	242.246	215.611	207.5	290.245	231.13	229.361	238.467	213.133	157	258.687	156.52	252.864	258.619	259.579	267.407	216.229	185.225	216.299	348.023	132.289	97.124	235.982	212.274	218.668
490	322.95	269.889	244.814	193.986	295.998	267.752	262.084	353.842	352.123	303.407	214.859	262.863	358.254	131.731	323.397	240.158	203.133	254.202	296.991	233.739	214.897	255.955	377.419	190.81	348.205	241.689	212.797	205.883	290.891	229.836	229.616	241.039	212.906	156.255	260.063	155.68	253.354	262.496	261.661	267.825	216.53	187.704	216.269	348.713	132.168	96.3029	234.906	212.305	217.879
491	325.089	267.757	245.831	192.599	301.087	270.415	258.287	353.741	351.616	303.299	211.121	264.907	353.904	131.377	316.472	240.67	203.835	258.278	295.076	234.865	217.03	255.825	377.871	186.333	349.819	240.065	210.328	204.326	292.285	228.898	229.872	240.407	213.157	155.493	261.529	154.837	253.74	266.267	263.682	268.132	216.877	189.926	216.111	349.404	132.08	95.7281	233.829	212.492	217.153
492	324.026	264.558	245.245	191.319	305.109	267.74	254.468	353.417	351.43	303.192	206.85	267.135	349.019	131.363	313.284	244.381	204.525	262.414	293.48	236.097	217.028	255.734	377.789	181.953	350.368	237.908	208.148	203.184	293.145	228.067	230.374	238.175	213.914	154.706	263.091	154.003	254.053	269.895	265.639	268.127	217.178	191.917	215.824	350.135	132.095	95.1123	232.773	212.46	216.584
493	320.295	263.492	244.127	190.146	309.985	266.667	250.18	352.834	351.137	303.083	207.914	269.538	346.269	132.32	312.231	247.027	205.215	266.193	292.099	237.222	220.76	255.624	378.776	177.039	353.05	241.087	206.251	202.873	293.471	227.698	231.04	240.211	215.008	153.895	264.753	153.21	254.334	273.239	267.376	267.919	217.456	193.645	215.427	350.784	132.25	94.5786	231.784	212.521	216.204
494	320.299	259.76	245.142	188.652	313.901	266.126	245.657	351.962	350.418	302.975	207.379	272.01	342.984	133.373	310.11	252.873	205.973	270.27	290.611	238.099	223.961	255.417	377.626	172.27	350.929	243.198	204.63	203.213	294.652	227.507	231.829	238.513	216.158	153.057	266.512	152.497	254.63	276.191	269.145	267.472	217.525	195.215	214.965	351.433	132.57	94.3734	230.83	212.52	215.604
495	318.17	256.559	245.625	187.478	319.097	266.121	241.091	350.877	349.805	303.935	206.843	274.529	337.565	134.184	305.854	254.987	206.814	273.753	288.909	238.904	223.426	255.151	377.544	167.696	351.476	242.107	203.317	204.562	296.046	227.281	232.167	238.95	217.42	152.191	268.355	151.913	254.974	279.001	271.071	266.841	217.501	196.56	214.508	351.837	133.044	94.1682	229.919	212.582	215.066
496	317.107	253.358	245.039	187.265	322.585	263.98	236.504	349.639	348.979	307.029	208.443	276.942	335.884	135.529	305.867	253.362	207.685	276.702	286.781	239.354	224.491	254.857	376.929	163.315	352.558	239.417	202.268	206.207	297.226	226.805	232.422	239.384	219.047	151.311	270.265	151.49	255.383	281.527	272.934	265.989	217.222	197.731	214.077	352.363	133.784	93.8809	229.095	212.675	214.529
497	318.18	248.558	247.654	186.732	326.18	262.373	232.003	348.295	347.832	305.32	207.372	279.19	333.134	137.116	304.813	255.474	208.626	279.296	284.439	239.554	223.423	254.543	376.313	158.886	352.038	236.192	201.45	208.089	298.62	226.294	232.144	236.62	220.337	150.434	272.216	151.228	255.855	283.732	274.797	264.972	216.803	198.694	213.688	352.725	134.782	93.4295	228.338	212.925	213.897
498	319.251	248.56	246.001	185.559	329.028	263.435	227.821	346.95	347.006	305.745	210.041	281.234	326.648	138.946	298.958	260.253	209.636	281.356	282.31	239.933	219.684	254.21	378.366	154.845	352.051	236.7	200.815	209.793	299.48	225.996	231.702	234.921	221.543	149.562	274.18	151.103	256.352	285.439	276.44	263.807	216.385	199.45	213.295	353.046	136.061	93.2652	227.587	213.269	213.328
499	314.452	248.03	242.215	184.92	332.409	260.225	223.939	345.642	346.072	309.906	212.172	283.133	320.695	140.921	300.038	263.965	210.684	282.823	280.502	240.204	223.419	254.002	376.684	150.999	350.464	236.676	200.375	212.446	299.913	225.592	231.711	234.824	223.03	148.709	276.127	151.084	256.815	287.003	277.801	262.347	215.874	199.963	212.911	353.572	137.614	92.9778	226.875	213.268	212.978
500	315.525	247.499	241.095	183.96	334.403	259.688	220.376	344.381	345.353	312.468	213.239	284.847	316.877	143.624	297.384	268.747	211.694	283.52	277.733	240.405	226.619	253.834	376.068	147.831	349.41	238.254	200.091	215.633	300.559	225.579	231.761	235.259	224.348	147.886	278.031	151.136	257.176	288.319	279.413	260.759	215.409	200.264	212.539	354.057	139.45	92.8135	226.209	213.267	212.441
501	317.13	244.832	242.111	182.467	336.077	256.478	216.92	343.129	344.419	315.56	213.237	286.435	311.458	146.424	294.196	271.925	212.691	284.038	274.75	240.356	228.218	253.733	377.054	144.761	346.222	236.099	199.933	219.294	300.885	225.922	231.853	234.094	225.526	147.093	279.874	151.236	257.389	289.066	280.743	259.135	214.828	200.3	212.222	354.541	141.532	92.9778	225.555	213.204	211.935
502	315.534	242.7	241.525	180.546	338.071	256.473	213.657	341.91	342.952	317.589	214.301	287.858	307.642	149.564	293.675	275.104	213.701	283.845	271.981	240.023	226.615	253.788	369.501	142.079	343.566	236.076	199.894	223.014	301.105	226.62	231.656	232.929	226.536	146.337	281.629	151.374	257.454	289.314	282.135	257.234	214.271	200.078	211.953	355.068	143.867	93.0598	224.92	213.203	211.397
503	315.004	242.703	239.872	178.946	339.211	256.466	210.799	340.728	341.592	320.683	215.366	289.077	303.824	152.752	291.553	280.417	214.711	282.703	268.571	239.654	227.148	254.076	367.818	139.445	341.447	236.052	199.994	226.616	301.645	227.212	231.583	231.763	227.517	145.623	283.282	151.543	257.412	288.708	283.213	255.167	213.76	199.648	211.752	355.471	146.409	93.2652	224.369	213.107	210.922
504	318.743	245.907	237.685	176.171	339.71	256.461	208.261	339.647	340.019	324.843	216.967	290.044	296.804	155.649	288.365	287.332	215.695	281.798	265.056	239.286	225.543	254.548	367.202	137.733	337.19	237.095	200.175	230.277	301.651	228.053	231.429	231.667	228.274	144.948	284.828	151.708	257.306	287.782	284.448	252.99	213.156	199.027	211.59	355.75	149.216	93.1831	223.892	212.949	210.573
505	317.149	244.842	238.167	174.464	339.676	256.987	206.107	338.729	338.125	329.538	218.033	290.749	296.722	158.789	285.178	291.578	216.699	280.538	262.607	238.845	224.475	255.33	365.518	136.264	335.069	238.673	200.438	233.998	301.231	228.859	231.068	229.968	229.03	144.303	286.244	151.839	257.179	286.465	285.557	250.758	212.482	198.215	211.453	355.743	152.241	93.142	223.439	212.791	210.287
506	315.017	242.709	240.252	172.971	339.002	259.117	204.786	338.002	336.125	333.7	219.096	291.231	291.305	162.268	286.258	294.759	217.746	278.921	260.264	238.334	220.735	256.404	363.837	134.891	330.28	235.449	200.807	237.897	301.557	229.806	230.421	227.203	229.618	143.703	287.529	151.929	257.035	284.686	286.29	248.47	211.716	197.246	211.329	355.694	155.446	93.0601	222.994	212.571	210.126
507	316.624	242.712	239.666	171.371	337.58	257.509	204.084	337.46	334.658	342.131	223.366	291.45	287.486	165.651	288.407	296.869	218.781	277.305	258.029	238.001	221.268	257.72	361.087	133.665	327.091	235.96	201.29	242.329	300.922	230.932	229.691	224.97	229.925	143.146	288.675	151.986	256.829	282.586	287.023	246.22	210.972	196.13	211.252	355.605	158.815	92.9369	222.6	212.412	209.965
508	315.027	244.849	236.945	171.051	336.799	255.902	203.745	337.094	333.405	347.893	229.233	291.427	286.338	169.082	285.754	297.38	219.779	275.747	257.075	237.419	218.064	259.25	359.936	132.971	323.904	237.002	201.86	246.346	299.541	231.773	229.536	223.806	230.345	142.632	289.676	152.018	256.498	280.272	287.536	244.043	210.206	194.88	211.234	355.679	162.368	92.6085	222.172	212.129	209.678
509	315.032	244.851	236.361	170.945	336.018	254.829	203.898	336.882	332.045	353.121	229.231	291.23	282.52	172.949	285.767	304.293	220.789	274.368	255.8	237.015	217.529	261.003	358.254	132.181	322.316	242.85	202.481	250.244	298.159	232.649	229.299	223.174	230.821	142.165	290.521	152.054	255.996	277.852	287.861	241.976	209.44	193.45	211.311	355.631	165.978	92.4443	221.708	212.096	209.298
510	315.036	246.453	241.112	169.345	335.877	253.754	204.349	336.799	330.791	359.419	233.499	290.916	277.635	176.962	282.577	301.07	221.799	272.692	253.991	236.504	214.859	262.863	353.904	131.731	323.397	240.158	203.133	254.202	296.991	233.739	229.226	220.942	230.903	141.757	291.205	152.105	255.3	275.326	288.311	239.965	208.905	191.919	211.464	355.5	169.622	92.4852	221.241	211.876	208.729
511	316.11	248.059	243.196	167.424	335.629	253.215	205.141	336.824	329.645	358.244	238.835	290.447	278.087	180.733	280.989	305.849	222.802	271.076	252.93	236.17	211.121	264.907	349.019	131.377	316.472	240.67	203.835	258.278	295.076	234.865	229.481	216.575	230.761	141.391	291.717	152.163	254.434	272.443	288.762	237.935	208.347	190.281	211.707	355.123	173.276	92.4441	220.747	211.78	208.348
512	316.114	248.06	237.272	166.678	334.848	250.006	206.382	336.908	328.285	359.202	241.5	289.91	278.538	184.6	282.072	310.63	223.699	269.223	251.975	235.553	206.85	267.135	346.269	131.363	313.284	244.381	204.525	262.414	293.48	236.097	229.45	214.343	230.59	141.063	292.048	152.204	253.469	269.453	289.212	236.218	207.976	188.537	211.997	354.582	176.864	92.4032	220.17	211.56	207.905
513	317.719	248.596	238.288	164.651	333.96	252.135	208.114	337.048	327.031	360.697	244.701	289.295	277.39	188.08	283.152	313.274	224.527	266.717	250.914	234.792	207.914	269.538	342.984	132.32	312.231	247.027	205.215	266.193	292.099	237.222	229.664	213.178	230.532	140.771	292.184	152.214	252.488	266.535	289.474	234.814	207.534	186.686	212.343	354.041	180.344	92.0749	219.547	211.433	207.524
514	316.656	249.666	235.034	163.051	332.859	251.594	210.486	337.179	327.165	360.589	245.767	288.505	279.444	191.268	283.166	313.251	225.242	264.626	249.96	233.997	207.379	272.01	337.565	133.373	310.11	252.873	205.973	270.27	290.611	238.099	229.96	208.278	230.559	140.5	292.11	152.171	251.573	263.51	289.799	233.576	207.023	184.79	212.736	353.212	183.724	91.6232	218.889	211.338	206.924
515	316.127	250.202	237.65	162.945	331.651	249.455	213.733	337.273	327.726	359.413	246.832	287.58	278.293	193.874	279.978	313.229	225.844	262.594	249.218	233.379	206.843	274.529	335.884	134.184	305.854	254.987	206.814	273.753	288.909	238.904	230.832	208.18	230.613	140.228	291.809	152.069	250.795	260.663	290.123	232.558	206.628	182.781	213.252	352.26	186.936	91.2538	218.185	211.18	205.978
516	315.598	252.339	238.666	163.052	330.763	248.914	217.429	337.339	329.142	364.642	247.896	286.675	278.213	196.286	277.856	314.807	226.307	260.267	248.37	232.761	208.443	276.942	333.134	135.529	305.867	253.362	207.685	276.702	286.781	239.354	231.703	207.548	231.005	139.95	291.262	151.856	250.19	257.887	290.354	231.854	206.279	180.699	213.935	351.637	189.939	90.679	217.445	211.147	205.158
517	314.535	251.806	237.547	162.733	330.835	244.64	221.552	337.327	330.984	359.73	247.895	285.73	278.665	198.165	275.203	319.586	226.739	257.702	248.057	232.286	207.372	279.19	326.648	137.116	304.813	255.474	208.626	279.296	284.439	239.554	232.944	207.986	231.565	139.66	290.443	151.5	249.748	255.04	290.302	231.259	206.069	178.601	214.784	351.178	192.723	90.1453	216.655	211.084	204.212
518	320.41	252.878	235.362	162.52	329.627	244.101	226.208	337.142	332.399	358.022	247.893	284.902	279.117	199.607	273.615	320.095	227.077	254.721	247.529	231.846	210.041	281.234	320.695	138.946	298.958	260.253	209.636	281.356	282.31	239.933	234.225	204.151	232.209	139.352	289.334	150.978	249.438	252.478	290.093	230.923	205.953	176.441	215.787	350.842	195.299	89.5706	215.826	210.988	203.141
519	315.612	252.881	235.844	162.841	328.952	239.29	230.993	336.813	333.281	354.177	250.026	284.277	279.569	200.903	275.23	319.539	227.271	251.86	247.642	231.406	212.172	283.133	316.877	140.921	300.038	263.965	210.684	282.823	280.502	240.204	235.794	204.587	233.05	139.044	287.914	150.292	249.205	250.2	289.633	230.678	206.3	174.213	216.927	350.506	197.644	89.1189	214.987	210.83	201.975
520	318.287	255.55	236.324	162.095	327.851	237.684	235.735	336.29	333.842	350.867	248.424	283.856	281.621	201.811	275.777	320.05	227.327	249.176	248.076	231.037	213.239	284.847	311.458	143.624	297.384	268.747	211.694	283.52	277.733	240.405	237.405	202.887	234.199	138.749	286.172	149.447	248.969	247.958	289.204	230.581	206.554	171.974	218.148	350.17	199.789	88.5441	214.131	210.578	200.747
521	318.822	256.62	238.408	162.095	327.283	236.076	240.541	335.507	334.296	345.423	248.955	283.543	285.81	202.282	276.325	317.892	227.231	246.966	248.295	230.74	213.237	286.435	307.642	146.424	294.196	271.925	212.691	284.038	274.75	240.356	238.892	200.123	235.321	138.473	284.104	148.498	248.672	245.858	288.839	230.686	206.856	169.752	219.437	349.588	201.758	88.0103	213.235	210.106	199.425
522	319.361	258.757	239.424	161.989	325.541	233.935	245.538	334.492	334.964	344.247	248.954	283.355	285.729	202.608	274.736	320.003	226.948	245.053	248.408	230.229	214.301	287.858	303.824	149.564	293.675	275.104	213.701	283.845	271.981	240.023	240.379	199.491	236.639	138.214	281.71	147.484	248.272	243.971	288.284	230.993	207.296	167.507	220.803	349.17	203.594	87.3123	212.321	209.76	197.851
523	320.433	263.563	237.771	162.417	325.079	233.394	250.408	333.314	335.952	338.267	247.35	283.128	289.381	202.546	276.352	317.845	226.482	242.725	248.734	230.18	215.366	289.077	296.804	152.752	291.553	280.417	214.711	282.703	268.571	239.654	241.989	198.327	238.211	137.977	279.005	146.435	247.755	242.369	287.856	231.466	207.689	165.297	222.275	348.67	205.248	86.6554	211.418	209.602	196.184
524	321.505	265.166	239.854	162.738	323.871	226.985	255.257	331.937	337.26	334.424	247.882	282.892	289.834	202.047	273.164	315.153	225.885	240.812	249.274	230.238	216.967	290.044	296.722	155.649	288.365	287.332	215.695	281.798	265.056	239.286	243.312	197.162	239.838	137.747	275.999	145.374	247.129	240.91	287.365	232.105	208.292	163.159	223.881	348.211	206.762	86.0397	210.478	209.507	194.516
525	319.375	268.904	239.802	163.273	322.77	224.842	259.806	330.406	338.569	330.047	246.278	282.753	291.887	201.305	273.177	313.53	225.155	238.959	249.92	230.297	218.033	290.749	291.305	158.789	285.178	291.578	216.699	280.538	262.607	238.845	244.388	200.799	241.634	137.507	272.713	144.351	246.446	239.593	286.779	232.909	208.802	161.094	225.635	347.874	208.177	85.4237	209.542	209.349	192.816
526	322.048	273.178	240.284	162.74	320.922	226.438	264.121	328.779	340.197	327.269	245.745	282.652	296.075	200.709	272.125	312.974	224.282	237.402	250.673	230.426	219.096	291.231	287.486	162.268	286.258	294.759	217.746	278.921	260.264	238.334	244.931	202.837	243.514	137.254	269.171	143.413	245.759	238.453	286.13	233.677	209.335	159.074	227.471	347.744	209.458	85.1773	208.63	209.096	190.992
527	324.721	274.78	242.368	162.101	319.607	224.831	267.923	327.053	341.719	320.225	246.274	282.581	296.527	200.21	271.07	315.084	223.307	236.141	251.533	230.697	223.366	291.45	286.338	165.651	288.407	296.869	218.781	277.305	258.029	238.001	245.31	202.205	245.535	136.99	265.396	142.624	245.133	237.528	285.419	234.426	210.053	157.111	229.4	347.654	210.587	84.6435	207.702	208.876	189.199
528	324.191	279.585	240.715	161.354	318.505	222.69	271.427	325.198	343.134	315.846	245.207	282.636	296.979	199.662	269.483	315.595	222.201	234.88	252.5	231.218	229.233	291.427	282.52	169.082	285.754	297.38	219.779	275.747	257.075	237.419	245.401	200.506	247.415	136.713	261.42	142.028	244.63	236.602	284.614	235.249	210.958	155.231	231.419	347.77	211.629	84.1509	206.762	208.561	187.405
529	323.662	286.527	242.797	160.928	317.511	221.618	274.546	323.241	344.123	315.205	245.204	282.788	299.031	198.92	266.293	313.97	221.045	233.62	253.36	231.81	229.231	291.23	277.635	172.949	285.767	304.293	220.789	274.368	255.8	237.015	245.328	196.674	249.463	136.424	257.272	141.658	244.294	235.783	283.683	236.108	211.978	153.436	233.52	347.598	212.617	83.3709	205.886	208.465	185.423
530	323.135	289.196	242.214	160.181	316.943	223.212	277.431	321.168	345.858	315.63	243.067	282.969	303.22	198.082	266.842	311.813	219.801	232.655	254.434	232.402	233.499	290.916	278.087	176.962	282.577	301.07	221.799	272.692	253.991	236.504	244.927	198.712	251.765	136.141	252.993	141.505	244.141	234.75	282.846	236.857	213.114	151.748	235.693	347.344	213.552	82.8371	205.052	208.245	183.348
531	326.341	294.002	246.964	160.289	316.589	219.47	279.632	319.001	347.914	309.119	243.066	283.034	303.672	196.952	267.389	309.655	218.475	231.336	255.614	233.172	238.835	290.447	278.538	180.733	280.989	305.849	222.802	271.076	252.93	236.17	244.444	198.081	253.813	135.86	248.622	141.563	244.166	233.789	281.884	237.643	214.181	150.149	237.951	347.131	214.477	82.6319	204.291	207.993	181.492
532	328.481	300.411	246.379	160.397	315.594	215.729	281.172	316.77	350.076	303.14	244.131	282.982	304.124	195.774	267.404	309.099	217.074	230.727	257.115	233.728	241.5	289.91	277.39	184.6	282.072	310.63	223.699	269.223	251.975	235.553	243.344	201.185	255.862	135.579	244.198	141.793	244.333	233.041	280.859	238.539	215.178	148.652	240.244	346.918	215.402	82.2625	203.633	207.74	180.012
533	324.748	303.08	247.928	160.184	313.746	217.857	281.964	314.516	352.452	302.498	246.798	282.891	306.177	194.062	267.416	308.007	215.654	230.237	259.149	234.106	244.701	289.295	279.444	188.08	283.152	313.274	224.527	266.717	250.914	234.792	242.204	202.154	257.602	135.309	239.771	142.169	244.587	232.364	279.928	239.399	216.152	147.245	242.558	346.829	216.283	81.6877	203.097	207.676	178.281
534	328.49	305.218	246.275	159.224	312.11	219.451	282.009	312.299	354.827	300.255	248.396	282.752	307.695	192.204	265.295	306.916	214.19	230.103	261.183	234.449	245.767	288.505	278.293	191.268	283.166	313.251	225.242	264.626	249.96	233.997	240.777	203.657	259.229	135.06	235.375	142.668	244.863	231.367	279.217	240.203	217.056	145.939	244.867	346.903	217.057	81.1541	202.66	207.518	176.614
535	327.96	308.955	247.824	158.584	310.048	220.513	281.307	310.151	356.776	296.945	247.861	282.554	313.486	190.346	263.71	304.759	212.751	230.207	263.751	234.72	246.832	287.58	278.213	193.874	279.978	313.229	225.844	262.594	249.218	233.379	239.349	204.627	260.519	134.832	231.052	143.256	245.105	230.548	278.505	240.916	217.775	144.66	247.155	347.06	217.737	80.6616	202.325	207.36	174.883
536	332.234	312.161	245.104	157.411	307.879	222.109	280.221	308.069	358.191	294.702	249.459	282.396	316.606	188.489	262.654	305.269	211.35	230.784	267.173	234.921	247.896	286.675	278.665	196.286	277.856	314.807	226.307	260.267	248.37	232.761	237.593	203.462	261.697	134.632	226.835	143.873	245.264	229.978	277.574	241.481	218.447	143.449	249.422	347.504	218.286	80.0459	202.138	207.359	173.404
537	332.238	313.765	250.922	155.597	305.817	219.433	278.9	306.102	359.073	294.595	251.594	282.296	321.861	186.728	260.534	302.579	210.012	231.837	270.808	235.37	247.895	285.73	279.117	198.165	275.203	319.586	226.739	257.702	248.057	232.286	235.796	202.831	262.622	134.456	222.755	144.462	245.313	229.515	276.863	241.862	219.189	142.34	251.659	347.784	218.727	79.2659	202.153	207.484	172.081
538	337.049	314.298	251.939	154.104	303.861	222.097	277.344	304.233	359.74	296.086	253.192	282.176	323.38	185.017	261.08	300.953	208.743	233.245	274.016	235.5	247.893	284.902	279.569	199.607	273.615	320.095	227.077	254.721	247.529	231.846	234.04	203.802	263.407	134.285	218.83	144.991	245.239	229.087	275.932	242.095	219.768	141.281	253.768	348.064	219.056	78.3628	202.326	207.703	170.602
539	338.118	313.235	252.42	153.465	301.479	217.82	275.553	302.471	359.448	297.58	251.056	281.988	329.169	183.256	260.562	297.727	207.511	234.416	277.438	235.664	250.026	284.277	281.621	200.903	275.23	319.539	227.271	251.86	247.642	231.406	232.407	204.772	263.911	134.104	215.078	145.425	245.033	228.731	275.378	242.274	220.185	140.216	255.736	348.22	219.351	77.2954	202.734	207.859	169.499
540	341.861	314.303	250.767	152.185	298.776	218.883	273.57	300.871	359.048	295.871	252.121	281.635	332.824	181.447	255.238	300.374	206.292	236.535	280.326	235.9	248.424	283.856	285.81	201.811	275.777	320.05	227.327	249.176	248.076	231.037	230.774	205.742	264.583	133.911	211.514	145.727	244.703	228.694	274.792	242.416	220.602	139.185	257.469	348.623	219.598	76.1871	203.412	207.952	168.679
541	341.865	308.435	251.783	150.691	296.821	221.009	271.353	299.494	358.329	294.162	249.985	281.224	334.876	179.832	254.718	302.486	205.117	238.892	283.321	236.279	248.955	283.543	285.729	202.282	276.325	317.892	227.231	246.966	248.295	230.74	229.018	210.447	264.806	133.714	208.15	145.856	244.252	228.587	274.112	242.263	220.95	138.204	258.92	349.231	219.832	75.2017	204.37	208.171	167.922
542	342.936	308.438	251.731	149.838	294.759	222.072	268.772	298.283	357.716	292.987	248.915	280.862	337.998	178.12	254.198	302.994	204.005	241.248	286.315	236.942	248.954	283.355	289.381	202.608	274.736	320.003	226.948	245.053	248.408	230.229	227.097	211.417	264.889	133.531	204.994	145.799	243.69	228.799	273.746	242	220.995	137.218	260.068	349.757	220.043	74.4217	205.608	208.703	167.541
543	345.077	305.238	253.282	148.984	293.444	223.132	265.786	297.254	356.569	292.88	250.515	280.538	340.583	175.972	250.477	298.168	202.955	244.02	289.524	237.64	247.35	283.128	289.834	202.546	276.352	317.845	226.482	242.725	248.734	230.18	225.054	214.521	264.718	133.377	202.056	145.546	243.045	228.941	273.443	241.627	220.971	136.215	260.914	350.243	220.254	73.2722	207.164	209.487	167.098
544	349.883	303.64	255.364	147.384	292.663	223.661	262.48	296.416	356.49	295.972	251.045	280.244	345.305	174.309	248.89	290.674	201.981	246.792	292.625	238.268	247.882	282.892	291.887	202.047	273.164	315.153	225.885	240.812	249.274	230.238	223.134	214.424	264.407	133.257	199.345	145.1	242.358	229.154	273.329	241.014	221.017	135.246	261.421	350.399	220.426	71.9996	208.983	210.459	167
545	350.954	299.373	254.246	146.531	291.775	223.121	258.982	295.721	355.77	295.865	247.841	280.065	350.56	172.694	251.036	286.916	201.12	249.385	296.687	238.788	246.278	282.753	296.075	201.305	273.177	313.53	225.155	238.959	249.92	230.297	221.788	218.063	263.872	133.172	196.863	144.484	241.653	229.829	273.434	240.273	220.854	134.316	261.63	350.597	220.547	70.6859	211.02	211.682	166.933
546	352.56	298.308	255.261	146.211	290.033	225.249	255.569	295.132	355.371	293.622	247.307	279.926	355.815	171.127	248.383	285.291	200.397	252.038	301.177	239.345	245.745	282.652	296.527	200.709	272.125	312.974	224.282	237.402	250.673	230.426	220.401	219.032	262.887	133.106	194.605	143.774	240.969	230.825	273.79	239.457	220.575	133.364	261.506	350.754	220.635	69.6596	213.244	213.282	167.306
547	354.166	292.438	252.541	145.678	288.611	224.178	252.476	294.692	355.291	294.58	247.304	279.738	359.47	169.658	249.998	284.734	199.78	254.869	304.492	240.221	246.274	282.581	296.979	200.21	271.07	315.084	223.307	236.141	251.533	230.697	219.056	223.204	261.818	133.042	192.57	143.004	240.337	231.606	274.083	238.513	220.11	132.394	261.011	350.746	220.684	68.6744	215.643	214.945	167.836
548	356.84	287.638	254.09	145.039	286.976	226.838	249.809	294.387	354.892	297.675	241.966	279.502	362.591	167.703	247.876	279.373	199.29	257.819	308.34	241.738	245.207	282.636	299.031	199.662	269.483	315.595	222.201	234.88	252.5	231.218	217.916	227.375	260.355	132.976	190.749	142.222	239.761	232.495	274.628	237.68	219.668	131.42	260.135	350.697	220.682	67.607	218.245	216.639	168.617
549	356.845	284.973	251.903	144.186	284.594	230.569	247.698	294.156	354.065	300.236	240.895	279.227	363.575	165.506	243.621	280.953	198.912	260.235	312.188	243.611	245.204	282.788	303.22	198.92	266.293	313.97	221.045	233.62	253.36	231.81	216.816	227.811	258.303	132.914	189.135	141.473	239.25	233.811	275.329	236.662	219.157	130.411	258.876	350.238	220.601	66.7858	221.02	218.396	169.743
550	357.384	280.705	253.452	143.119	282.425	230.562	246.121	293.976	353.773	303.329	237.16	278.903	364.562	163.406	243.101	278.794	198.628	262.117	315.931	245.626	243.067	282.969	303.672	198.082	266.842	311.813	219.801	232.655	254.434	232.402	215.922	228.249	256.11	132.854	187.721	140.84	238.841	235.162	276.219	235.737	218.577	129.436	257.236	350.026	220.441	66.17	223.962	220.373	171.152
551	356.319	276.972	255.002	141.946	281.216	232.158	244.758	293.843	352.306	302.688	235.022	278.696	364.48	161.597	242.58	278.237	198.357	263.822	318.498	248.174	243.066	283.034	304.124	196.952	267.389	309.655	218.475	231.336	255.614	233.172	215.152	230.82	253.58	132.801	186.502	140.366	238.559	236.62	277.172	234.719	217.764	128.478	255.289	349.607	220.218	65.9238	227.083	222.507	172.749
552	355.257	275.372	256.018	141.093	280.862	235.887	243.48	293.728	350.091	307.916	231.819	278.498	366.532	159.594	243.663	276.078	198.068	265.229	322.347	250.723	244.131	282.982	306.177	195.774	267.404	309.099	217.074	230.727	257.115	233.728	214.463	233.392	251.219	132.761	185.476	140.128	238.425	238.22	278.501	233.702	216.812	127.543	253.064	348.984	219.979	65.6364	230.403	224.766	174.66
553	355.261	273.242	254.365	139.813	280.508	236.948	242.458	293.636	348.091	309.409	228.08	278.349	366.45	157.882	243.142	271.785	197.727	266.519	325.769	253.272	246.798	282.891	307.695	194.062	267.416	308.007	215.654	230.237	259.149	234.106	213.856	235.427	248.549	132.734	184.633	140.144	238.474	239.963	280.019	232.61	215.813	126.663	250.545	348.238	219.742	65.7184	233.87	227.119	176.446
554	350.996	268.973	251.644	139.494	279.727	238.008	241.756	293.568	346.411	313.038	225.41	278.269	369.037	156.607	241.02	268.029	197.287	267.63	329.831	256.141	248.396	282.752	313.486	192.204	265.295	306.916	214.19	230.103	261.183	234.449	213.373	239.065	246.075	132.716	183.97	140.407	238.697	241.812	281.286	231.464	214.815	125.851	247.739	347.45	219.549	65.5953	237.432	229.724	178.388
555	350.468	263.639	248.925	138.534	278.412	237.47	241.46	293.532	344.731	313.997	220.071	278.216	370.558	155.137	241.035	268.538	196.765	268.385	333.573	259.081	247.861	282.554	316.606	190.346	263.71	304.759	212.751	230.207	263.751	234.72	213.3	242.704	243.433	132.705	183.472	140.871	239.055	243.199	282.521	230.502	213.839	125.017	244.678	346.704	219.462	65.7595	241.093	232.58	180.644
556	351.005	262.575	249.407	137.574	276.35	239.597	241.847	293.454	343.371	314.958	219.001	278.087	371.01	153.716	242.649	269.583	196.218	268.607	337.422	262.27	249.459	282.396	321.861	188.489	262.654	305.269	211.35	230.784	267.173	234.921	213.391	243.673	240.678	132.708	183.125	141.513	239.502	244.8	283.693	229.668	212.794	124.244	241.347	346.121	219.471	66.17	244.809	235.278	182.713
557	344.606	260.441	247.221	136.614	274.288	240.659	242.981	293.348	342.011	314.315	216.865	277.899	368.793	152.344	243.732	267.959	195.702	268.769	340.95	265.388	251.594	282.296	323.38	186.728	260.534	302.579	210.012	231.837	270.808	235.37	213.647	245.712	237.896	132.725	182.912	142.267	239.989	246.151	285.022	229	211.866	123.584	237.816	345.826	219.548	66.7858	248.521	238.009	184.687
558	344.612	257.776	247.169	136.188	271.905	244.923	244.862	293.219	341.078	317.943	214.728	277.799	370.847	151.117	242.676	260.997	195.218	268.813	345.119	268.506	253.192	282.176	329.169	185.017	261.08	300.953	208.743	233.245	274.016	235.5	213.861	249.35	235.225	132.758	182.824	143.091	240.455	247.573	286.383	228.295	210.937	123.07	234.127	345.367	219.652	67.689	252.224	240.645	186.692
559	340.346	257.244	244.982	135.121	269.523	247.585	247.469	293.095	339.611	321.571	212.059	277.766	364.893	150.23	242.691	261.506	194.746	268.857	348.755	271.695	251.056	281.988	332.824	183.256	260.562	297.727	207.511	234.416	277.438	235.664	214.363	254.055	232.33	132.801	182.838	143.946	240.86	248.854	287.587	227.793	210.147	122.662	230.284	344.826	219.784	68.7153	255.943	243.061	188.477
560	337.68	258.315	242.795	134.802	267.781	249.181	250.439	292.98	337.824	321.462	209.922	277.811	364.277	149.44	242.704	259.35	194.249	268.901	351.963	275.098	252.121	281.635	334.876	181.447	255.238	300.374	206.292	236.535	280.326	235.9	215.111	257.16	229.632	132.843	182.945	144.785	241.145	249.92	289.01	227.346	209.473	122.401	226.3	344.449	219.856	69.9878	259.675	245.414	190.326
561	336.62	255.114	235.806	134.055	266.68	247.038	253.686	292.963	336.57	324.557	211.522	278.002	360.994	148.844	243.252	256.125	193.657	268.767	354.851	278.43	249.985	281.224	337.998	179.832	254.718	302.486	205.117	238.892	283.321	236.279	216.147	261.865	226.878	132.865	183.131	145.521	241.242	250.951	290.183	226.972	208.8	122.246	222.197	343.867	219.871	71.712	263.418	247.831	191.892
562	334.488	254.048	236.287	134.056	265.471	247.033	257.083	292.978	335.531	323.914	209.384	278.299	358.779	148.394	243.799	259.303	192.928	268.278	357.738	281.868	248.915	280.862	340.583	178.12	254.198	302.994	204.005	241.248	286.315	236.942	217.47	264.437	224.46	132.862	183.381	146.119	241.076	252.196	291.167	226.654	208.196	122.159	217.966	343.531	219.84	73.0258	267.175	250.153	193.332
563	330.225	251.916	232.5	134.484	263.836	248.094	260.352	292.993	334.277	323.807	209.917	278.587	359.763	147.895	242.745	253.943	192.067	267.669	359.452	285.057	250.515	280.538	345.305	175.972	250.477	298.168	202.955	244.02	289.524	237.64	218.546	267.007	222.183	132.821	183.69	146.538	240.59	253.511	291.962	226.52	207.615	122.1	213.713	343.072	219.788	74.2984	270.946	252.192	194.364
564	324.891	249.785	229.78	135.125	263.482	250.757	263.151	292.999	333.772	323.165	210.447	278.875	358.081	147.153	242.227	250.718	191.137	266.942	361.06	288.068	251.045	280.244	350.56	174.309	248.89	290.674	201.981	246.792	292.625	238.268	219.827	266.375	220.159	132.74	184.046	146.732	239.749	254.685	292.633	226.607	207.057	122.102	209.533	342.613	219.719	75.6942	274.704	254.389	195.333
565	326.498	251.92	226.526	135.66	263.768	248.082	265.886	292.981	333.159	322.523	210.98	279.211	356.932	146.508	244.374	252.296	190.125	266.334	363.093	290.973	247.841	280.065	355.815	172.694	251.036	286.916	201.12	249.385	296.687	238.788	221.068	268.947	218.668	132.62	184.446	146.691	238.583	255.929	293.052	226.693	206.593	122.172	205.472	342.03	219.71	77.2131	278.394	256.585	195.894
566	327.035	252.992	223.272	136.728	263.948	250.745	268.578	292.936	332.866	326.685	213.644	279.547	358.452	146.203	241.72	251.204	189.088	265.666	364.381	293.45	247.307	279.926	359.47	171.127	248.383	285.291	200.397	252.038	301.177	239.345	222.637	271.518	217.459	132.47	184.883	146.447	237.169	256.996	293.376	226.909	206.429	122.298	201.565	341.448	219.793	78.7322	281.995	258.719	196.204
567	321.171	250.859	222.153	137.796	263.38	252.339	271.292	292.919	333.107	329.246	213.643	279.99	355.701	146.093	244.401	247.978	188.001	265.236	365.348	295.501	247.304	279.738	362.591	169.658	249.998	284.734	199.78	254.869	304.492	240.221	224.207	275.156	216.586	132.3	185.351	146.005	235.608	258.062	293.575	227.179	206.15	122.486	197.834	340.66	219.97	80.3744	285.466	260.696	196.075
568	322.776	247.659	218.9	138.971	263.559	252.867	274.156	292.976	333.988	331.271	215.776	280.511	355.62	146.176	244.95	243.152	186.876	264.747	366.101	297.765	241.966	279.502	363.575	167.703	247.876	279.373	199.29	257.819	308.34	241.738	225.529	276.125	216.079	132.12	185.844	145.402	233.975	258.844	293.618	227.45	205.964	122.713	194.315	339.914	220.256	81.9756	288.772	262.547	195.882
569	316.909	250.33	218.315	139.613	263.952	252.861	277.232	293.088	334.762	331.164	217.91	281.022	356.072	146.065	244.429	241.53	185.72	264.079	366.427	299.389	240.895	279.227	364.562	165.506	243.621	280.953	198.912	260.235	312.188	243.611	226.852	276.028	216.049	131.944	186.351	144.706	232.335	259.2	293.503	227.794	206.056	122.935	190.985	339.126	220.675	83.7409	291.908	264.398	195.47
570	311.043	249.799	211.325	141.001	264.131	252.854	280.266	293.265	336.071	332.123	218.974	281.562	353.854	145.857	244.443	239.905	184.57	263.233	366.114	300.692	237.16	278.903	364.48	163.406	243.101	278.794	198.628	262.117	315.931	245.626	228.011	275.398	216.525	131.78	186.868	143.963	230.699	259.661	293.42	228.138	206.241	123.168	187.817	338.462	221.161	85.2599	294.885	266.061	195.153
571	312.114	249.268	210.739	142.709	264.097	253.382	282.894	293.485	337.486	332.547	221.642	282.18	354.308	145.6	242.855	238.28	183.464	262.744	366.333	301.462	235.022	278.696	366.532	161.597	242.58	278.237	198.357	263.822	318.498	248.174	229.128	275.834	217	131.632	187.388	143.219	229.031	259.839	293.242	228.556	206.449	123.44	184.819	337.921	221.685	86.6967	297.702	267.41	194.584
572	311.587	250.87	207.485	144.632	264.704	252.843	285.096	293.764	339.221	331.374	225.91	282.875	357.428	145.053	244.471	232.92	182.389	262.61	365.913	301.911	231.819	278.498	366.45	159.594	243.663	276.078	198.068	265.229	322.347	250.723	230.205	276.27	217.701	131.481	187.913	142.542	227.3	260.122	293.159	228.993	206.657	123.746	182.048	337.215	222.3	88.0927	300.347	268.633	193.701
573	310.522	250.339	208.5	147.194	265.096	255.505	286.678	294.16	340.636	331.8	226.442	283.697	359.48	144.214	241.816	227.027	181.321	262.536	365.492	302.076	228.08	278.349	369.037	157.882	243.142	271.785	197.727	266.519	325.769	253.272	231.199	278.841	218.429	131.319	188.439	141.995	225.522	260.477	292.981	229.447	206.958	124.136	179.499	336.387	222.979	89.3242	302.804	269.731	192.849
574	307.326	250.342	207.916	150.717	265.169	256.034	287.748	294.672	342.371	334.359	230.176	284.751	363.134	143.715	239.694	222.734	180.227	262.402	364.964	301.956	225.41	278.269	370.558	156.607	241.02	268.029	197.287	267.63	329.831	256.141	231.948	279.276	219.438	131.131	188.976	141.621	223.717	260.975	292.678	229.883	207.538	124.656	177.193	335.394	223.69	90.2684	305.084	270.389	191.935
575	308.399	252.478	212.133	154.987	264.815	257.094	288.348	295.355	343.893	333.184	234.976	285.912	365.187	142.974	238.641	218.442	179.077	262.446	364.329	301.267	220.071	278.216	371.01	155.137	241.035	268.538	196.765	268.385	333.573	259.081	232.86	279.712	220.644	130.918	189.516	141.469	221.949	261.33	292.155	230.283	208.048	125.231	175.118	334.565	224.435	91.6642	307.208	270.89	190.926
576	306.801	253.548	212.082	159.578	264.14	259.755	288.735	296.21	344.988	336.278	233.906	287.18	365.639	142.426	235.987	215.217	177.846	262.193	363.908	300.187	219.001	278.087	368.793	153.716	242.649	269.583	196.218	268.607	337.422	262.27	233.937	276.413	222.215	130.68	190.064	141.567	220.327	261.543	291.727	230.682	208.673	125.813	173.26	333.654	225.23	92.9779	309.207	271.015	190.012
577	301.47	252.483	209.361	163.848	263.146	258.683	288.759	297.213	345.869	338.839	236.039	288.564	366.09	141.539	236.001	209.856	176.57	261.822	362.847	298.359	216.865	277.899	370.847	152.344	243.732	267.959	195.702	268.769	340.95	265.388	234.398	275.783	223.674	130.432	190.614	141.905	218.955	261.72	291.172	231.045	209.369	126.366	171.578	332.826	226.016	94.0043	311.099	270.763	189.004
578	304.678	253.552	207.174	167.371	262.151	258.143	288.484	298.31	347.498	339.799	239.241	290.035	367.078	140.215	236.547	207.697	175.332	261.866	361.572	296.069	214.728	277.799	364.893	151.117	242.676	260.997	195.218	268.813	345.119	268.506	234.899	275.685	225.245	130.185	191.166	142.444	217.902	261.826	290.587	231.371	210.227	126.863	170.058	332.326	226.805	95.1128	312.859	270.071	187.901
579	304.682	253.022	210.325	170.788	260.836	254.934	288.017	299.545	349.127	339.157	240.306	291.691	368.597	138.843	237.096	202.338	174.163	262.325	360.297	293.352	212.059	277.766	364.277	150.23	242.691	261.506	194.746	268.857	348.755	271.695	235.319	278.256	226.957	129.951	191.708	143.147	217.239	261.967	289.938	231.55	211.038	127.287	168.712	332.072	227.612	95.9337	314.467	269.003	186.767
580	302.55	255.692	211.341	173.99	259.948	256.529	287.252	300.818	351.502	337.982	241.905	293.619	364.778	137.374	236.575	197.512	173.045	262.369	358.489	290.208	209.922	277.811	360.994	149.44	242.704	259.35	194.249	268.901	351.963	275.098	235.944	277.624	228.668	129.73	192.232	143.952	217.016	261.789	289.164	231.747	211.711	127.688	167.585	331.859	228.469	96.96	315.918	267.714	186.135
581	303.09	257.296	215.025	176.66	259.06	255.457	286.208	302.146	354.198	335.204	244.571	295.74	366.299	136.05	234.988	193.751	171.995	261.938	356.36	286.637	211.522	278.002	358.779	148.844	243.252	256.125	193.657	268.767	354.851	278.43	236.528	278.06	230.492	129.523	192.73	144.805	217.228	261.575	288.579	231.888	212.453	128.073	166.68	331.892	229.361	97.9453	317.19	266.05	185.629
582	302.56	256.765	213.373	179.329	257.425	258.653	284.802	303.512	356.254	336.697	244.57	297.92	365.682	134.92	235.001	189.459	171.059	261.567	354.659	282.639	209.384	278.299	359.763	148.394	243.799	259.303	192.928	268.278	357.738	281.868	236.906	279.03	232.288	129.332	193.188	145.661	217.844	261.289	288.119	231.938	213.125	128.474	165.983	331.844	230.301	98.6843	318.295	264.039	185.343
583	299.363	258.902	215.99	181.038	255.576	260.247	283.182	304.896	358.31	337.124	245.635	300.003	363.466	134.324	232.88	183.031	170.129	261.433	353.171	278.108	209.917	278.587	358.081	147.895	242.745	253.943	192.067	267.669	359.452	285.057	237.408	279.467	234.028	129.149	193.597	146.461	218.815	261.004	287.69	232.062	213.658	128.932	165.492	331.672	231.298	99.5054	319.25	261.715	184.962
584	300.968	262.106	218.072	182.96	254.048	258.64	281.092	306.228	360.151	338.616	246.7	301.882	362.317	133.728	233.962	181.407	169.205	261.003	352.216	273.398	210.447	278.875	356.932	147.153	242.227	250.718	191.137	266.942	361.06	288.068	238.074	276.7	235.402	128.98	193.96	147.143	220.082	261.181	287.293	231.983	214.33	129.451	165.185	331.623	232.303	100.244	320.075	259.014	184.676
585	301.507	265.31	221.222	183.815	252.733	259.7	278.597	307.552	361.567	339.043	245.097	303.548	362.235	132.938	235.577	178.183	168.331	260.572	352.008	268.511	210.98	279.211	358.452	146.508	244.374	252.296	190.125	266.334	363.093	290.973	239.028	278.738	236.524	128.833	194.282	147.668	221.574	261.323	287.053	231.848	214.863	130.027	165.043	332.191	233.265	100.819	320.812	256.125	184.609
586	302.579	267.447	224.907	184.883	251.845	260.228	275.525	308.866	362.662	338.4	242.96	305.048	362.153	132.633	232.921	176.558	167.52	260.557	352.228	263.339	213.644	279.547	355.701	146.203	241.72	251.204	189.088	265.666	364.381	293.45	240.063	278.106	237.477	128.695	194.575	148.025	223.257	261.678	287.126	231.641	215.234	130.67	165.043	332.84	234.185	101.189	321.465	253.016	184.574
587	300.448	269.586	228.59	185.845	251.704	258.622	272.261	310.158	364.397	339.358	241.892	306.306	363.673	132.085	232.934	177.603	166.728	259.474	352.341	258.131	213.643	279.99	355.62	146.093	244.401	247.978	188.001	265.236	365.348	295.501	241.222	280.144	238.487	128.559	194.852	148.211	225.126	261.855	287.043	231.433	215.929	131.364	165.205	333.777	235.042	101.394	322.022	249.593	184.57
588	298.851	271.723	226.939	187.019	252.097	255.413	268.741	311.389	365.812	341.921	241.889	307.428	361.458	132.12	235.084	176.511	165.929	258.332	351.493	252.71	215.776	280.511	356.072	146.176	244.95	243.152	186.876	264.747	366.101	297.765	242.545	283.248	239.412	128.423	195.131	148.242	227.209	261.996	287.211	231.004	216.532	132.069	165.512	334.672	235.848	101.599	322.544	245.982	184.629
589	299.924	274.393	231.155	187.874	252.597	255.942	265.285	312.554	367.334	342.346	240.288	308.502	360.308	132.64	234.03	173.287	165.15	257.19	349.578	246.863	217.91	281.022	353.854	146.065	244.429	241.53	185.72	264.079	366.427	299.389	243.95	279.948	240.112	128.281	195.433	148.111	229.53	262.067	287.41	230.649	216.925	132.779	165.918	335.773	236.689	101.763	323.034	242.056	185.001
590	298.861	274.93	235.373	188.088	252.136	254.335	262.022	313.604	368.963	341.17	238.684	309.546	360.76	133.354	235.112	169.527	164.389	256.048	347.77	240.908	218.974	281.562	354.308	145.857	244.443	239.905	184.57	263.233	366.114	300.692	245.848	280.386	240.869	128.121	195.769	147.822	232.111	262.279	287.672	230.165	217.273	133.467	166.408	337.244	237.598	101.763	323.447	238.288	185.217
591	298.332	277.067	236.388	188.195	251.354	256.996	259.207	314.506	371.232	340.528	239.216	310.455	355.877	134.553	232.458	172.173	163.61	254.847	345.321	234.811	221.642	282.18	357.428	145.6	242.855	238.28	183.464	262.744	366.333	301.462	247.951	281.355	241.625	127.962	196.158	147.382	234.946	262.278	287.997	229.7	217.574	134.149	166.984	338.755	238.533	101.681	323.776	234.74	185.433
592	297.803	278.671	240.609	187.129	250.359	256.991	256.626	315.272	373.18	340.954	237.612	311.461	356.86	135.703	231.938	172.15	162.824	253.586	342.765	228.998	225.91	282.875	359.48	145.053	244.471	232.92	182.389	262.61	365.913	301.911	250.177	282.325	242.354	127.824	196.619	146.809	238	262.242	288.51	229.069	217.759	134.804	167.637	340.143	239.514	101.599	324.017	231.223	185.994
593	298.874	279.74	242.157	186.276	249.151	255.917	254.537	315.928	375.236	339.245	237.078	312.554	356.778	136.854	232.486	166.788	162.094	252.148	340.743	223.293	226.442	283.697	363.134	144.214	241.816	227.027	181.321	262.536	365.492	302.076	252.28	280.626	242.998	127.732	197.169	146.13	241.211	261.992	289.149	228.437	217.851	135.368	168.286	341.614	240.5	101.271	324.12	227.863	186.461
594	297.812	281.877	243.172	185.316	248.156	253.242	252.682	316.467	377.185	340.737	234.405	313.541	355.632	137.859	235.166	165.701	161.415	251.361	339.255	217.8	230.176	284.751	365.187	143.715	239.694	222.734	180.227	262.402	364.964	301.956	254.547	278.927	243.474	127.692	197.814	145.414	244.522	261.494	289.819	227.806	217.85	135.826	169.003	343.207	241.47	100.942	324.084	224.722	187.242
595	297.816	283.481	244.722	185.211	247.589	250.568	251.02	316.877	378.066	342.231	235.472	314.488	355.015	139.446	236.782	166.209	160.768	250.101	337.66	212.415	234.976	285.912	365.639	142.974	238.641	218.442	179.077	262.446	364.329	301.267	257.142	277.228	243.809	127.716	198.553	144.704	247.893	261.386	290.803	227.157	217.826	136.21	169.818	344.924	242.412	100.737	323.96	221.77	188.431
596	299.957	284.015	247.339	184.571	247.235	251.094	249.422	317.087	378.2	339.988	236.003	315.435	351.731	141.373	236.262	167.786	160.139	250.026	336.492	207.136	233.906	287.18	366.09	142.426	235.987	215.217	177.846	262.193	363.908	300.187	259.738	274.996	244.116	127.793	199.377	144.031	251.297	261.279	291.975	226.562	217.709	136.477	170.757	346.641	243.393	100.326	323.757	219.038	189.746
597	296.226	283.485	248.354	184.892	247.094	251.087	248.165	317.074	378.228	337.212	233.866	316.393	351.116	143.397	234.674	165.096	159.541	249.536	335.858	202.249	236.039	288.564	367.078	141.539	236.001	209.856	176.57	261.822	362.847	298.359	262.169	273.832	244.395	127.909	200.266	143.415	254.724	261.064	293.43	225.987	217.43	136.665	171.769	348.357	244.361	99.9568	323.484	216.368	190.935
598	295.161	281.887	252.039	185.64	246.739	252.15	246.908	316.796	376.974	339.772	233.331	317.515	349.432	145.42	234.687	167.208	158.982	249.402	334.903	197.575	239.241	290.035	368.597	140.215	236.547	207.697	175.332	261.866	361.572	296.069	264.026	275.869	244.365	128.042	201.187	142.911	258.164	260.815	295.011	225.355	217.128	136.819	172.883	349.869	245.321	99.4641	323.188	213.856	191.998
599	295.166	281.888	256.255	186.601	245.851	250.544	245.95	316.264	375.827	339.131	235.998	318.889	348.817	147.202	235.77	163.982	158.409	249.565	334.055	193.221	240.306	291.691	364.778	138.843	237.096	202.338	174.163	262.325	360.297	293.352	265.883	274.702	244.251	128.186	202.117	142.558	261.591	260.387	296.623	224.835	216.594	136.968	174.083	351.668	246.258	98.9304	322.873	211.5	193.25
600	295.171	281.357	257.805	188.737	244.643	250.003	245.248	315.504	375.428	337.954	238.132	320.274	347.668	148.983	237.918	166.627	157.818	249.786	332.781	188.939	241.905	293.619	366.299	137.374	236.575	197.512	173.045	262.369	358.489	290.208	267.657	274.605	243.8	128.335	203.028	142.419	264.945	259.923	298.14	224.185	215.92	137.094	175.342	353.959	247.148	98.4789	322.503	209.333	194.533
601	294.109	284.027	258.287	191.299	243.221	246.261	245.037	314.572	375.029	336.781	240.265	321.58	345.453	150.861	237.398	170.873	157.239	250.305	331.506	185.297	244.571	295.74	365.682	136.05	234.988	193.751	171.995	261.938	356.36	286.637	269.185	273.976	243.18	128.496	203.891	142.53	268.152	259.282	299.658	223.609	215.154	137.204	176.614	356.086	247.9	97.8631	322.088	207.511	195.973
602	295.714	281.361	258.235	194.181	241.799	247.323	244.997	313.496	374.736	332.402	240.263	322.77	345.371	152.594	236.344	169.782	156.698	251.238	329.377	181.833	244.57	297.92	363.466	134.92	235.001	189.459	171.059	261.567	354.659	282.639	270.467	271.742	242.504	128.684	204.674	142.901	271.118	258.499	300.956	223.089	214.387	137.218	177.946	358.214	248.553	97.3294	321.565	205.752	197.319
603	292.517	282.966	260.318	197.385	240.804	246.783	245.362	312.342	375.51	330.692	242.394	323.64	345.822	154.424	239.56	170.827	156.164	252.291	327.676	178.76	245.635	300.003	362.317	134.324	232.88	183.031	170.129	261.433	353.171	278.108	271.585	271.112	241.744	128.902	205.354	143.489	273.737	257.644	301.94	222.586	213.737	137.125	179.307	360.3	249.145	96.7546	320.968	204.244	198.822
604	292.521	281.9	262.934	201.014	239.809	248.377	245.941	311.076	375.858	330.051	246.662	324.365	341.473	156.254	243.844	170.804	155.679	253.698	325.974	176.327	246.7	301.882	362.235	133.728	233.962	181.407	169.205	261.003	352.216	273.398	272.702	272.082	240.956	129.154	205.906	144.253	275.918	256.968	303.113	222.084	213.017	136.886	180.643	362.304	249.661	96.1387	320.342	202.862	200.388
605	292.526	282.436	269.288	204.111	238.922	249.439	246.926	309.717	376.954	332.078	250.929	325.215	339.789	158.132	238.519	173.45	155.345	255.047	324.379	174.571	245.097	303.548	362.153	132.938	235.577	178.183	168.331	260.572	352.008	268.511	273.286	271.45	240.027	129.444	206.308	145.125	277.608	256.398	304.348	221.582	212.412	136.495	181.945	364.349	250.12	95.7282	319.694	201.95	202.08
606	289.329	282.973	271.906	207.74	238.354	249.432	248.017	308.28	377.942	331.436	253.598	326.173	338.639	160.155	240.669	173.958	155.1	256.514	322.464	173.633	242.96	305.048	363.673	132.633	232.921	176.558	167.52	260.557	352.228	263.339	273.501	271.353	238.986	129.766	206.551	146.06	278.767	255.97	305.269	221.135	211.785	135.975	183.247	366.599	250.559	95.2766	319.005	201.227	203.457
607	289.333	285.11	273.454	211.584	237.573	248.894	249.557	306.777	378.503	330.26	255.195	327.159	335.889	161.5	241.216	173.935	154.917	257.981	320.976	173.335	241.892	306.306	361.458	132.085	232.934	177.603	166.728	259.474	352.341	258.131	273.428	268.588	237.552	130.104	206.644	147.025	279.388	255.364	305.971	220.761	211.228	135.405	184.536	368.644	250.946	94.5377	318.329	200.567	204.96
608	285.601	283.512	271.268	215.748	237.005	246.218	251.545	305.191	379.064	330.686	261.063	328.175	336.342	163.039	241.23	174.447	154.853	259.508	319.381	173.465	241.889	307.428	360.308	132.12	235.084	176.511	165.929	258.332	351.493	252.71	272.821	269.556	235.864	130.453	206.603	147.99	279.5	255.15	306.358	220.369	210.693	134.744	185.83	370.689	251.235	93.9219	317.63	199.969	206.557
609	287.741	281.378	269.615	219.805	237.077	246.746	254.045	303.559	379.626	326.843	263.731	329.006	334.124	165.063	244.446	180.295	154.915	261.272	317.466	174.092	240.288	308.502	360.76	132.64	234.03	173.287	165.15	257.19	349.578	246.863	272.091	268.392	233.868	130.803	206.454	148.888	279.14	255.078	306.463	219.941	210.438	134.011	187.166	372.981	251.392	93.3473	316.919	199.435	207.715
610	286.678	283.516	269.563	223.435	237.79	246.206	256.972	301.88	379.44	326.734	266.398	329.536	330.308	166.698	244.993	181.338	155.001	262.798	315.017	175.36	238.684	309.546	355.877	133.354	235.112	169.527	164.389	256.048	347.77	240.908	270.951	266.695	231.619	131.148	206.226	149.671	278.332	254.935	306.317	219.567	209.787	133.182	188.583	375.354	251.411	92.7316	316.219	199.182	208.967
611	286.682	289.389	273.247	227.492	238.183	246.733	260.433	300.197	379.574	327.161	270.665	329.882	329.159	168.043	248.209	180.781	155.145	264.383	312.781	177.268	239.216	310.455	356.86	134.553	232.458	172.173	163.61	254.847	345.321	234.811	269.605	267.664	229.09	131.489	205.947	150.305	277.114	254.934	306.014	219.396	209.322	132.275	190.081	377.687	251.32	92.0748	315.568	199.056	210.062
612	284.553	286.723	276.932	231.335	238.576	246.728	264.022	298.499	380.135	328.653	271.196	330.093	323.74	169.242	248.756	180.757	155.307	265.91	311.293	179.603	237.612	311.461	356.778	135.703	231.938	172.15	162.824	253.586	342.765	228.998	267.603	267.032	226.363	131.817	205.634	150.771	275.536	254.791	305.365	219.225	208.997	131.345	191.665	379.773	251.172	91.7875	314.954	198.96	210.937
613	284.557	288.326	275.811	234.751	238.435	246.721	267.483	296.848	379.735	327.478	277.066	330.138	323.123	170.441	247.169	181.269	155.457	267.555	310.018	182.33	237.078	312.554	355.632	136.854	232.486	166.788	162.094	252.148	340.743	223.293	265.231	266.401	223.553	132.13	205.299	151.056	273.648	254.791	304.717	219.183	208.718	130.454	193.317	381.449	251.028	91.2948	314.381	199.054	211.624
614	286.164	289.93	276.828	237.954	237.654	246.716	270.666	295.272	378.482	327.371	280.8	329.989	318.774	171.64	248.25	185.517	155.581	268.963	309.598	185.412	234.405	313.541	355.015	137.859	235.166	165.701	161.415	251.361	339.255	217.8	262.161	264.701	220.433	132.43	204.951	151.189	271.531	254.79	303.786	219.141	208.508	129.614	195.029	383.412	250.925	90.8021	313.831	199.272	212.122
615	284.032	293.667	281.045	241.797	236.126	246.709	273.401	293.788	377.335	321.926	283.466	329.655	314.421	172.985	250.399	189.227	155.7	270.608	309.924	189.171	235.472	314.488	351.731	139.446	236.782	166.209	160.768	250.101	337.66	212.415	258.927	261.935	217.285	132.711	204.598	151.19	269.283	255.003	302.51	219.301	208.461	128.892	196.796	385.457	250.832	90.1452	313.302	199.554	212.401
616	282.436	293.67	279.393	246.815	234.811	245.103	275.688	292.378	375.654	317.547	283.998	329.235	309.536	174.475	250.946	190.273	155.849	272.193	310.784	193.071	236.003	315.435	351.116	141.373	236.262	167.786	160.139	250.026	336.492	207.136	255.447	262.906	214.081	132.951	204.243	151.07	267.009	255.607	300.857	219.406	208.437	128.288	198.615	387.379	250.757	89.3652	312.742	200.118	212.302
617	282.442	296.34	282.011	252.046	233.496	245.632	277.548	291.056	373.547	317.973	285.063	328.814	306.253	175.723	252.026	193.984	156.081	274.016	310.683	197.435	233.866	316.393	349.432	143.397	234.674	165.096	159.541	249.536	335.858	202.249	251.761	262.275	211.074	133.155	203.899	150.798	264.782	256.317	299.141	219.64	208.46	127.728	200.459	389.178	250.726	88.2978	312.194	200.87	212.047
618	282.98	296.877	280.356	256.957	232.395	245.091	279.045	289.8	371.76	317.864	288.262	328.549	303.502	177.359	251.508	193.428	156.387	275.602	310.476	201.798	233.331	317.515	348.817	145.42	234.687	167.208	158.982	249.402	334.903	197.575	248.281	262.177	207.87	133.333	203.577	150.381	262.663	257.384	297.331	219.892	208.436	127.214	202.38	391.099	250.645	87.3126	311.678	201.56	211.447
619	282.985	298.481	281.907	261.44	232.147	242.95	280.286	288.627	370.187	318.291	289.862	328.468	299.686	178.461	251.522	195.54	156.757	276.951	309.948	206.766	235.998	318.889	347.668	147.202	235.77	163.982	158.409	249.565	334.055	193.221	244.882	262.613	204.722	133.479	203.287	149.839	260.683	258.451	295.27	220.255	208.551	126.824	204.326	392.652	250.508	86.4916	311.153	202.343	210.564
620	278.718	299.55	282.922	264.644	232.433	245.078	281.185	287.57	368.614	318.716	288.258	328.377	300.671	179.417	250.467	196.05	157.183	277.944	309.207	211.77	238.132	320.274	345.453	148.983	237.918	166.627	157.818	249.786	332.781	188.939	241.073	261.448	201.631	133.602	203.042	149.187	258.861	259.411	293.114	220.672	208.504	126.568	206.235	394.204	250.421	85.7937	310.606	202.97	209.367
621	280.859	298.486	282.87	265.605	232.932	244.006	281.422	286.61	367.147	315.405	288.257	328.305	300.055	180.81	253.149	198.696	157.634	278.818	308.145	216.738	240.265	321.58	345.371	150.861	237.398	170.873	157.239	250.305	331.506	185.297	237.552	261.884	198.736	133.726	202.85	148.45	257.226	260.548	290.865	221.293	208.55	126.464	208.083	395.593	250.392	85.0549	310.09	203.88	208.17
622	279.796	295.819	283.353	265.926	234.179	244.532	281.211	285.748	365.04	314.764	289.323	328.253	296.772	182.252	253.164	197.604	158.06	279.455	306.978	221.35	240.263	322.77	345.822	152.594	236.344	169.782	156.698	251.238	329.377	181.833	233.702	262.854	196.178	133.853	202.718	147.691	255.844	261.935	288.427	222.005	208.781	126.562	209.876	396.981	250.362	84.521	309.573	204.569	206.471
623	279.267	295.287	282.767	265.927	235.212	242.391	280.424	284.984	363.253	311.989	287.186	328.104	295.624	183.209	252.643	200.783	158.511	280.151	305.81	225.998	242.394	323.64	341.473	154.424	239.56	170.827	156.164	252.291	327.676	178.76	230.017	265.427	193.648	133.966	202.648	146.941	254.798	263.144	286.303	222.901	209.128	126.918	211.562	398.082	250.371	83.9872	309.046	205.353	204.772
624	282.474	293.155	286.45	265.394	236.032	242.384	278.847	284.284	361.892	314.014	287.717	327.684	294.473	183.971	251.057	201.828	158.969	280.61	305.068	230.61	246.662	324.365	339.789	156.254	243.844	170.804	155.679	253.698	325.974	176.327	226.783	268.531	191.539	134.063	202.645	146.233	254.167	264.496	284.305	223.927	209.429	127.488	213.12	399.1	250.424	83.5357	308.55	206.199	202.853
625	280.343	292.622	281.596	265.181	237.706	242.379	276.672	283.622	359.785	317.109	287.716	327.409	291.188	184.637	249.469	202.338	159.438	280.95	304.648	234.796	250.929	325.215	338.639	158.132	238.519	173.45	155.345	255.047	324.379	174.571	223.795	271.101	189.599	134.134	202.714	145.601	254.022	265.74	282.432	225.117	209.869	128.278	214.567	400.284	250.495	82.9608	308.069	207.234	200.777
626	278.212	289.424	282.077	264.861	239.7	242.907	274.241	282.987	357.037	317	287.179	327.182	292.175	184.72	249.483	203.917	159.902	280.935	303.48	238.803	253.598	326.173	335.889	160.155	240.669	173.958	155.1	256.514	322.464	173.633	221.095	272.069	188.249	134.168	202.846	145.106	254.381	267.163	280.873	226.363	210.449	129.297	215.912	401.261	250.566	82.4272	307.557	208.112	198.795
627	281.42	289.426	281.492	264.542	241.374	241.299	271.469	282.431	354.503	320.095	287.178	326.907	289.426	184.415	248.962	204.96	160.372	280.979	302.632	242.633	255.195	327.159	336.342	161.5	241.216	173.935	154.917	257.981	320.976	173.335	218.846	270.906	187.348	134.172	203.028	144.779	255.19	268.834	279.44	227.701	210.889	130.603	217.129	401.91	250.609	81.8936	307.026	208.959	196.437
628	283.558	286.761	284.643	264.756	242.514	241.828	268.525	281.95	352.289	314.65	288.244	326.506	288.811	183.333	247.909	209.741	160.81	281.082	301.891	246.676	261.063	328.175	334.124	163.039	241.23	174.447	154.853	259.508	319.381	173.465	216.885	272.942	186.673	134.176	203.241	144.675	256.344	270.328	278.226	228.966	211.26	132.201	218.251	402.354	250.669	81.5652	306.512	209.617	193.89
629	285.698	282.493	286.726	265.291	243.761	241.287	265.582	281.524	350.289	311.339	283.439	326.104	285.527	181.524	246.856	212.92	161.255	281.482	300.19	250.684	263.731	329.006	330.308	165.063	244.446	180.295	154.915	261.272	317.466	174.092	215.252	275.513	186.334	134.201	203.456	144.813	257.722	271.821	276.824	230.341	211.746	134.046	219.327	402.716	250.779	81.5241	306.004	210.369	191.249
630	285.169	278.226	286.141	265.719	243.727	242.348	262.532	281.144	348.502	313.366	281.302	325.48	285.978	179.521	245.268	213.431	161.75	281.704	298.808	254.478	266.398	329.536	329.159	166.698	244.993	181.338	155.001	262.798	315.017	175.36	213.619	277.552	186.388	134.262	203.631	145.194	259.205	273.066	275.14	231.734	212.047	136.122	220.3	403.201	250.89	81.6473	305.504	210.934	188.86
631	287.842	276.627	283.955	265.506	242.945	243.944	259.503	280.858	347.142	313.793	276.497	324.923	285.896	177.082	244.748	210.205	162.271	281.748	297.533	257.952	270.665	329.882	323.74	168.043	248.209	180.781	155.145	264.383	312.781	177.268	212.15	279.056	187.032	134.392	203.744	145.781	260.71	274.061	273.738	233.127	212.371	138.411	221.128	403.358	251.033	81.524	305.046	211.466	186.313
632	288.381	276.63	282.836	265.72	241.737	246.071	256.346	280.631	346.102	315.818	275.428	324.289	284.748	174.205	248.498	210.181	162.797	281.495	296.792	261.318	271.196	330.093	323.123	169.242	248.756	180.757	155.307	265.91	311.293	179.603	210.723	280.024	188.21	134.598	203.772	146.548	262.215	274.986	272.524	234.575	212.556	140.863	221.815	403.268	251.205	81.2365	304.632	211.999	183.986
633	286.784	273.962	282.25	265.615	241.383	242.329	253.061	280.428	344.208	317.846	273.29	323.422	285.733	170.941	246.912	213.362	163.324	281.183	296.051	264.614	277.066	330.138	318.774	170.441	247.169	181.269	155.457	267.555	310.018	182.33	209.952	276.725	189.865	134.883	203.712	147.435	263.756	275.59	271.656	236.024	212.834	143.45	222.298	402.891	251.361	81.1954	304.301	212.375	181.753
634	288.39	273.965	281.664	265.188	241.135	242.858	249.819	280.29	341.994	319.873	270.087	322.652	284.585	167.579	246.925	214.938	163.838	281.109	295.844	267.519	280.8	329.989	314.421	171.64	248.25	185.517	155.581	268.963	309.598	185.412	209.879	279.297	191.718	135.262	203.56	148.392	265.398	275.802	270.82	237.435	213.089	146.166	222.575	402.473	251.487	81.3185	303.999	212.593	179.708
635	290.53	270.767	276.81	264.442	241.314	241.251	246.919	280.217	339.993	318.164	267.418	322.299	288.239	163.975	246.405	215.982	164.27	281.153	294.996	270.103	283.466	329.655	309.536	172.985	250.399	189.227	155.7	270.608	309.924	189.171	209.888	278.13	194.019	135.77	203.329	149.378	267.192	275.802	269.826	238.718	213.366	148.977	222.617	401.686	251.626	81.2366	303.693	212.938	177.884
636	290.001	270.768	277.825	264.549	241.707	241.778	244.125	280.181	338.527	322.325	262.078	321.927	290.825	159.691	245.35	211.69	164.614	281.137	295.322	272.474	283.998	329.235	306.253	174.475	250.946	190.273	155.849	272.193	310.784	193.071	210.102	274.832	196.573	136.424	203.027	150.342	269.171	275.659	269.146	239.928	213.551	151.851	222.412	401.022	251.72	81.1546	303.385	213.565	176.247
637	290.006	268.637	280.441	263.909	242.527	240.172	241.928	280.131	337.487	321.683	261.542	321.662	293.945	155.651	246.967	214.334	164.915	280.707	294.474	274.738	285.063	328.814	303.502	175.723	252.026	193.984	156.081	274.016	310.683	197.435	210.276	277.404	199.717	137.243	202.67	151.21	271.312	275.124	268.874	241.173	213.666	154.758	221.942	399.988	251.806	81.2365	303.101	214.411	174.674
638	290.543	265.969	284.126	262.309	243.24	241.232	240.479	280.104	336.768	319.976	261.006	321.726	295.465	151.61	243.243	214.312	165.171	280.099	294.267	276.931	288.262	328.549	299.686	177.359	251.508	193.428	156.387	275.602	310.476	201.798	210.942	276.772	203.198	138.243	202.27	151.928	273.538	274.412	268.728	242.383	213.596	157.597	221.263	398.502	251.939	80.9903	302.809	215.038	173.1
639	296.951	263.304	288.343	260.816	243.313	239.625	239.691	280.082	336.048	317.198	258.871	321.937	300.185	147.957	247.526	211.087	165.352	279.609	293.099	278.804	289.862	328.468	300.671	178.461	251.522	195.54	156.757	276.951	309.948	206.766	211.731	278.275	207.017	139.43	201.858	152.47	275.745	273.593	268.582	243.408	213.619	160.353	220.336	397.181	252.101	81.0724	302.568	215.571	171.903
640	292.687	262.239	288.291	259.429	242.531	239.084	239.374	280.093	335.221	311.22	256.2	322.03	302.24	144.693	248.073	213.733	165.426	279.416	291.611	280.961	288.258	328.377	300.055	179.417	250.467	196.05	157.183	277.944	309.207	211.77	212.767	274.441	210.947	140.778	201.465	152.821	277.829	272.631	268.436	244.341	213.548	163.012	219.213	395.777	252.249	80.9902	302.417	216.103	171.114
641	292.158	261.173	288.774	257.615	241.537	234.276	239.568	280.117	333.434	308.977	255.131	322.143	304.826	141.525	249.689	215.843	165.457	279.638	289.909	283.119	288.257	328.305	296.772	180.81	253.149	198.696	157.634	278.818	308.145	216.738	213.966	275.411	214.709	142.257	201.119	152.988	279.702	271.35	268.415	245.201	213.571	165.582	217.902	394.333	252.403	80.7849	302.321	216.573	170.546
642	293.763	263.312	287.655	255.268	240.435	236.405	239.805	280.192	331.647	312.603	252.994	322.169	310.615	138.164	249.703	214.752	165.387	279.8	289.276	285.027	289.323	328.253	295.624	182.252	253.164	197.604	158.06	279.455	306.978	221.35	215.33	273.712	218.612	143.855	200.843	153.009	281.323	269.997	268.615	245.858	213.57	168.034	216.412	392.807	252.585	80.3744	302.243	216.98	170.134
643	298.038	259.045	290.807	253.347	240.188	236.933	240.043	280.324	329.647	312.496	251.392	322.224	310	134.802	249.716	215.797	165.235	279.904	288.961	286.579	287.186	328.104	294.473	183.209	252.643	200.783	158.511	280.151	305.81	225.998	216.694	271.48	222.599	145.563	200.633	152.918	282.69	268.537	268.783	246.478	213.616	170.391	214.742	391.116	252.751	80.2103	302.181	217.638	169.816
644	296.442	258.514	289.687	251.64	239.94	235.326	240.216	280.552	328.287	311.854	246.585	322.522	307.25	131.926	250.265	215.241	165.052	279.354	289.181	287.918	287.717	327.684	291.188	183.971	251.057	201.828	158.969	280.61	305.068	230.61	217.73	271.917	226.305	147.37	200.478	152.735	283.793	267.007	269.139	246.73	213.615	172.618	212.949	389.302	252.873	79.9231	302.137	218.359	170
645	295.912	257.448	288.568	249.826	240.76	236.921	240.155	280.892	326.606	311.211	246.05	322.8	309.836	129.292	250.278	214.683	164.869	278.687	290.147	289.186	287.716	327.409	292.175	184.637	249.469	202.338	159.438	280.95	304.648	234.796	219.094	272.886	229.786	149.291	200.349	152.454	284.642	265.512	269.338	246.927	213.638	174.688	211.031	387.981	252.96	79.8	302.107	219.206	170.499
646	301.788	255.848	287.981	247.799	241.473	235.847	239.837	281.334	325.353	310.572	246.047	323.039	313.491	127.338	252.425	215.727	164.592	278.434	290.687	290.312	287.179	327.182	289.426	184.72	249.483	203.917	159.902	280.935	303.48	238.803	219.883	271.721	233.239	151.33	200.219	152.078	285.234	263.945	269.757	246.94	213.73	176.556	209.012	386.741	253.009	79.6768	302.106	219.833	171.123
647	299.657	256.385	288.997	245.879	241.973	231.037	239.541	281.883	324.526	305.659	245.514	323.366	313.943	126.208	251.372	216.773	164.17	277.826	291.546	291.152	287.178	326.907	288.811	184.415	248.962	204.96	160.372	280.979	302.632	242.633	220.918	272.157	236.58	153.485	200.063	151.641	285.551	262.522	270.333	246.88	213.799	178.171	206.949	385.462	252.996	78.979	302.17	220.24	171.684
648	298.595	256.921	289.479	243.958	241.832	229.965	239.309	282.538	323.166	305.55	239.106	323.634	318.129	125.127	251.387	217.816	163.623	276.803	290.699	292.064	288.244	326.506	285.527	183.333	247.909	209.741	160.81	281.082	301.891	246.676	222.693	270.992	239.808	155.732	199.871	151.172	285.573	261.205	270.877	246.672	213.844	179.572	204.869	384.017	252.966	78.3631	302.256	220.741	172.465
649	299.132	259.058	291.563	241.825	241.478	229.958	239.141	283.296	321.165	304.377	236.971	323.66	320.184	124.288	251.934	219.927	162.956	275.186	290.278	292.87	283.439	326.104	285.978	181.524	246.856	212.92	161.255	281.482	300.19	250.684	224.755	269.294	242.868	158.036	199.647	150.702	285.318	260.279	271.39	246.372	213.82	180.788	202.777	382.449	252.954	77.9526	302.347	221.242	173.12
650	301.273	256.925	288.841	239.798	241.444	228.884	239.272	284.076	319.912	308.004	233.764	323.608	322.772	123.595	255.149	220.437	162.164	272.918	289.323	293.568	281.302	325.48	285.896	179.521	245.268	213.431	161.75	281.704	298.808	254.478	226.981	269.729	245.591	160.344	199.381	150.28	284.795	259.353	271.715	245.925	214.029	181.83	200.706	381.005	252.917	77.5831	302.4	221.9	173.775
651	301.277	258.531	287.722	237.77	241.943	228.877	239.872	284.908	318.552	311.097	231.096	323.44	325.357	123.241	253.028	219.88	161.29	270.53	288.262	294.125	276.497	324.923	284.748	177.082	244.748	210.205	162.271	281.748	297.533	257.952	229.289	266.43	248.089	162.626	199.08	149.922	284.011	258.32	272.197	245.349	214.074	182.692	198.674	379.684	252.893	77.501	302.442	222.81	174.619
652	299.681	261.2	286.069	236.064	242.656	227.805	240.963	285.814	317.085	315.794	227.357	323.213	327.41	123.325	250.907	223.061	160.454	267.728	286.988	294.93	275.428	324.289	285.733	174.205	248.498	210.181	162.797	281.495	296.792	261.318	231.597	262.064	250.334	164.843	198.747	149.624	282.96	257.715	272.836	244.46	214.097	183.403	196.654	378.158	252.875	77.0905	302.463	223.531	175.4
653	302.353	260.668	286.017	234.25	243.156	234.203	242.225	286.767	316.899	315.685	226.289	322.947	326.795	123.99	251.456	223.571	159.612	264.747	286.567	295.486	273.29	323.422	284.585	170.941	246.912	213.362	163.324	281.183	296.051	264.614	234.029	259.297	252.523	166.971	198.387	149.385	281.616	257.287	273.443	243.48	214.166	183.989	194.655	376.549	252.826	76.8032	302.46	224.252	176.212
654	301.29	261.738	284.366	232.543	244.509	235.798	243.679	287.705	317.567	318.779	221.484	322.789	329.38	125.237	254.67	224.615	158.719	261.589	286.04	296.185	270.087	322.652	288.239	167.579	246.925	214.938	163.838	281.109	295.844	267.519	236.296	255.996	254.46	169.006	198.007	149.236	279.949	256.966	273.925	242.407	214.351	184.464	192.687	375.063	252.723	76.5158	302.458	224.816	177.276
655	301.296	261.207	284.314	230.089	244.796	236.86	245.283	288.676	317.702	325.075	219.88	322.824	331.968	126.825	257.354	222.456	157.82	258.253	285.192	296.492	267.418	322.299	290.825	163.975	246.405	215.982	164.27	281.153	294.996	270.103	238.111	255.367	256.031	170.939	197.638	149.196	277.964	256.823	274.312	241.334	214.536	184.809	190.791	373.455	252.541	76.4337	302.493	225.6	178.371
656	300.765	260.675	282.662	227.848	245.615	239.521	247.036	289.703	318.69	324.966	213.474	323.131	336.157	128.655	258.434	221.366	156.965	255.213	284.344	296.764	262.078	321.927	293.945	159.691	245.35	211.69	164.614	281.137	295.322	272.474	239.927	249.934	257.349	172.762	197.295	149.316	275.725	256.894	274.449	240.059	214.744	185.054	188.981	372.134	252.304	76.1052	302.585	226.446	179.56
657	303.973	263.347	278.873	225.393	245.901	239.515	248.554	290.739	319.785	324.859	208.669	323.564	339.276	130.339	257.381	223.479	156.129	251.581	283.497	297	261.542	321.662	295.465	155.651	246.967	214.334	164.915	280.707	294.474	274.738	241.947	248.768	258.274	174.474	196.987	149.607	273.357	257.071	274.585	238.839	214.72	185.23	187.255	370.689	252.054	75.6946	302.684	227.324	180.529
658	302.376	265.483	276.687	222.406	246.081	242.177	250.115	291.807	321.093	330.088	205.999	324.046	338.661	132.071	252.589	222.921	155.293	247.711	282.222	297.343	261.006	321.726	300.185	151.61	243.243	214.312	165.171	280.099	294.267	276.931	243.804	242.265	258.975	176.073	196.713	150.057	271.039	257.533	274.69	237.582	214.603	185.3	185.616	369.081	251.81	75.243	302.822	228.547	181.435
659	302.916	265.485	273.967	219.418	245.727	244.841	251.57	292.908	322.295	332.649	202.261	324.314	344.984	134.435	255.273	227.701	154.482	243.485	280.626	297.935	258.871	321.937	302.24	147.957	247.526	211.087	165.352	279.609	293.099	278.804	246.153	240.033	259.226	177.564	196.468	150.617	268.96	257.994	274.575	236.325	214.579	185.303	184.027	367.267	251.607	74.7093	302.941	229.865	182.122
660	302.385	264.421	273.915	217.177	246.012	249.102	252.896	294.051	324.244	335.744	199.058	324.379	344.902	136.993	257.955	222.34	153.678	239.616	279.031	298.491	256.2	322.03	304.826	144.693	248.073	213.733	165.426	279.416	291.611	280.961	247.723	237.267	259.364	178.963	196.22	151.261	267.282	258.634	274.555	235.16	214.648	185.249	182.481	365.494	251.462	74.3808	303.007	231.465	182.746
661	306.126	265.49	273.329	214.83	245.444	253.367	253.859	295.189	326.299	335.635	197.988	324.366	345.887	139.744	256.902	225.519	152.873	235.865	276.69	299.083	255.131	322.143	310.615	141.525	249.689	215.843	165.457	279.638	289.909	283.119	248.553	233.433	259.278	180.282	195.96	151.935	266.12	259.523	274.409	233.904	214.648	185.128	181.004	364.091	251.409	74.2167	302.975	233.065	183.182
662	304.53	266.56	272.745	213.443	245.304	258.699	254.758	296.332	329.208	337.127	191.581	324.517	347.408	142.544	255.849	229.767	152.043	232.113	273.386	299.426	252.994	322.169	310	138.164	249.703	214.752	165.387	279.8	289.276	285.027	249.095	234.937	258.883	181.526	195.677	152.619	265.552	260.233	274.451	232.849	214.601	184.934	179.624	362.811	251.406	73.8881	302.885	234.885	183.492
663	301.866	269.765	270.557	211.523	245.376	262.428	255.55	297.446	332.118	337.554	187.31	325.009	348.394	145.199	259.065	231.345	151.282	227.888	270.19	300.053	251.392	322.224	307.25	134.802	249.716	215.797	165.235	279.904	288.961	286.579	249.105	230.571	258.713	182.706	195.371	153.3	265.605	260.909	274.776	231.887	214.739	184.69	178.343	361.407	251.456	73.6008	302.702	236.736	183.614
664	301.337	268.701	269.44	209.602	245.128	266.157	256.428	298.552	335.668	337.445	185.174	325.947	349.913	147.951	262.28	230.787	150.603	223.662	266.995	300.752	246.585	322.522	309.836	131.926	250.265	215.241	165.052	279.354	289.181	287.918	248.703	227.272	258.458	183.825	195.033	153.96	266.27	261.512	274.912	231.127	215.017	184.378	177.229	359.881	251.538	72.985	302.454	239.027	183.735
665	299.74	268.168	268.854	208.002	244.881	268.285	257.285	299.611	339.325	336.269	182.503	326.865	349.831	150.605	259.625	225.961	150.019	219.496	263.372	301.593	246.05	322.8	313.491	129.292	250.278	214.683	164.869	278.687	290.147	289.186	248.343	225.039	257.866	184.889	194.675	154.536	267.523	262.366	275.017	230.477	215.016	184.054	176.242	358.519	251.745	72.6565	302.123	241.38	183.794
666	299.211	266.57	268.803	205.868	244.741	268.28	258.291	300.61	343.087	334.56	181.433	327.279	351.35	153.551	256.971	224.336	149.478	215.686	259.962	302.434	246.047	323.039	313.943	127.338	252.425	215.727	164.592	278.434	290.687	290.312	247.285	219.07	257.219	185.897	194.296	154.992	269.3	263.041	275.185	229.975	215.062	183.748	175.341	357.444	251.99	72.4513	301.74	244.11	183.853
667	297.614	272.977	269.817	203.414	244.386	272.01	259.51	301.511	346.851	334.453	175.561	327.305	352.335	156.545	261.786	224.314	149.012	212.172	256.66	302.883	245.514	323.366	318.129	126.208	251.372	216.773	164.17	277.826	291.546	291.152	245.939	217.371	256.543	186.855	193.9	155.304	271.493	263.538	275.635	229.693	215.247	183.447	174.504	356.081	252.241	72.1638	301.299	246.621	184.038
668	298.687	271.912	267.098	201.813	244.352	277.341	260.709	302.287	350.828	330.609	174.491	327.078	356.523	159.297	265.003	227.492	148.572	209.132	253.037	303.546	239.106	323.634	320.184	125.127	251.387	217.816	163.623	276.803	290.699	292.064	244.881	213.005	255.895	187.788	193.491	155.469	273.985	263.929	276.023	229.725	215.315	183.163	173.718	354.883	252.452	71.9175	300.781	249.288	184.065
669	297.623	275.116	263.845	199.893	244.212	276.8	261.821	302.938	354.591	328.367	172.889	326.735	353.774	162.194	263.415	225.334	148.112	205.915	249.201	303.96	236.971	323.66	322.772	124.288	251.934	219.927	162.956	275.186	290.278	292.87	243.864	211.307	254.882	188.699	193.093	155.489	276.686	264.142	276.567	229.867	215.268	182.902	172.953	353.521	252.596	71.8765	300.124	252.144	184.281
670	296.028	275.118	264.325	198.185	243.643	277.329	262.977	303.501	358.354	326.124	172.886	326.693	355.826	164.897	262.363	223.71	147.641	202.638	244.617	304.552	233.764	323.608	325.357	123.595	255.149	220.437	162.164	272.918	289.323	293.568	242.723	210.675	253.56	189.598	192.735	155.408	279.496	264.141	277.08	229.953	215.175	182.685	172.257	352.24	252.592	72.0408	299.329	255.094	184.466
671	293.897	271.92	264.273	197.226	243.076	277.323	263.919	303.961	362.011	325.482	175.02	327.087	353.077	167.406	261.843	223.686	147.175	200.31	240.14	305.215	231.096	323.44	327.41	123.241	253.028	219.88	161.29	270.53	288.262	294.125	241.337	207.376	252.097	190.494	192.437	155.236	282.366	264.033	277.405	230.298	215.151	182.486	171.664	351.084	252.489	72.4924	298.39	258.17	184.619
672	293.902	274.055	265.29	196.266	242.508	280.518	264.37	304.32	365.561	324.84	169.681	327.55	350.86	169.867	262.923	225.799	146.703	198.812	236.624	306.056	227.357	323.213	326.795	123.325	250.907	223.061	160.454	267.728	286.988	294.93	239.827	208.878	250.494	191.405	192.216	154.991	285.287	263.784	277.855	230.734	215.104	182.28	171.185	350.091	252.323	72.8619	297.319	261.245	184.489
673	291.773	275.125	267.372	195.52	240.979	281.579	264.671	304.627	369.217	320.997	171.815	327.808	351.312	172.521	262.937	225.776	146.162	197.907	233.427	306.932	226.289	322.947	329.38	123.99	251.456	223.571	159.612	264.747	286.567	295.486	238.03	205.045	248.583	192.311	192.088	154.676	288.23	263.498	278.651	231.501	214.917	182.047	170.792	349.016	252.125	73.3135	296.095	264.509	184.234
674	293.377	275.661	269.454	194.773	239.558	284.775	265.037	304.897	372.02	319.287	170.745	327.64	350.696	175.273	262.95	223.617	145.615	197.062	229.804	307.809	221.484	322.789	331.968	125.237	254.67	224.615	158.719	261.589	286.04	296.185	236.109	202.813	246.867	193.22	192.039	154.297	291.119	263.142	279.415	232.343	214.754	181.814	170.467	347.817	251.981	73.5599	294.764	267.741	183.979
675	291.248	275.13	269.403	193.493	238.349	286.904	265.274	305.075	374.93	319.712	173.411	326.948	347.947	177.733	262.964	221.459	145.017	196.809	227.356	308.863	219.88	322.824	336.157	126.825	257.354	222.456	157.82	258.253	285.192	296.492	234.066	202.715	245.18	194.127	192.051	153.824	293.865	262.572	280.054	233.386	214.452	181.524	170.185	346.66	251.939	73.6009	293.349	270.691	183.85
676	295.521	275.133	270.419	191.679	237.355	289.565	265.703	305.215	377.519	318.538	173.943	326.042	347.865	180.291	262.977	219.833	144.439	196.972	225.12	309.74	213.474	323.131	339.276	128.655	258.434	221.366	156.965	255.213	284.344	296.764	232.31	204.753	243.577	195.027	192.097	153.266	296.346	261.824	280.661	234.411	214.126	181.179	169.954	346.078	251.955	73.3957	291.809	273.421	183.877
677	289.122	273.001	269.833	189.546	236.253	290.094	266.282	305.379	380.322	318.429	177.678	325.233	345.649	182.363	264.06	217.678	143.841	198.024	222.137	310.936	208.669	323.564	338.661	130.339	257.381	223.479	156.129	251.581	283.497	297	230.8	199.852	242.059	195.912	192.146	152.626	298.423	260.827	281.206	235.602	213.708	180.822	169.762	345.701	251.998	73.4778	290.121	275.806	183.999
678	290.195	273.537	269.781	187.625	235.579	287.952	266.904	305.575	382.805	314.586	180.343	324.356	339.695	184.387	267.809	214.985	143.256	199.728	219.048	311.706	205.999	324.046	344.984	132.071	252.589	222.921	155.293	247.711	282.222	297.343	229.208	200.288	240.793	196.787	192.163	151.921	300.01	259.865	281.593	236.774	213.29	180.403	169.659	345.406	252.078	73.4367	288.332	278.16	184.246
679	290.2	274.606	272.399	185.811	234.797	291.682	267.205	305.812	385.074	314.478	183.01	323.276	339.082	186.605	267.289	213.36	142.671	202.085	216.599	312.262	202.261	324.314	344.902	134.435	255.273	227.701	154.482	243.485	280.626	297.935	228.191	200.725	239.639	197.659	192.117	151.167	301.084	258.762	281.792	238.094	212.871	179.872	169.637	344.865	252.188	73.3956	286.452	280.168	184.493
680	289.136	275.143	271.815	183.784	233.269	291.144	267.571	306.129	387.129	314.37	183.542	321.682	338.465	188.58	268.903	214.938	142.099	204.56	214.043	312.818	199.058	324.379	345.887	136.993	257.955	222.34	153.678	239.616	279.031	298.491	227.379	200.093	238.795	198.534	191.988	150.423	301.678	257.445	281.929	239.432	212.685	179.273	169.693	344.488	252.248	73.3546	284.458	282.27	184.898
681	287.005	274.076	270.694	182.291	231.954	292.204	267.915	306.529	389.078	315.862	188.343	319.767	337.315	190.459	270.519	217.05	141.527	207.45	211.808	313.375	197.988	324.366	347.408	139.744	256.902	225.519	152.873	235.865	276.69	299.083	226.649	199.995	238.203	199.427	191.771	149.715	301.87	256.448	281.908	240.954	212.406	178.624	169.786	344.029	252.303	73.4367	282.413	283.964	185.27
682	287.544	275.147	267.975	180.477	230.853	290.598	268.558	307.027	389.959	314.687	193.144	317.502	334.567	192.24	272.669	215.427	140.998	210.637	209.893	314.216	191.581	324.517	348.394	142.544	255.849	229.767	152.043	232.113	273.386	299.426	225.919	199.897	237.668	200.341	191.476	149.072	301.763	255.308	281.793	242.513	212.127	177.975	169.918	343.405	252.373	73.3956	280.33	285.313	185.832
683	287.014	272.48	269.524	179.517	229.538	294.86	269.479	307.59	390.2	314.58	196.344	315.151	335.551	193.876	273.749	216.471	140.514	214.357	208.939	314.914	187.31	325.009	349.913	145.199	259.065	231.345	151.282	227.888	270.19	300.053	225.395	197.667	237.301	201.273	191.139	148.509	301.446	254.276	281.585	244.017	211.662	177.343	170.098	342.782	252.443	73.3134	278.205	286.286	186.707
684	286.486	273.552	270.539	178.664	228.33	293.787	270.805	308.213	391.188	313.938	196.877	312.916	333.869	195.075	273.763	214.313	140.01	218.434	207.984	315.755	185.174	325.947	349.831	147.951	262.28	230.787	150.603	223.662	266.995	300.752	225.158	200.77	237.13	202.202	190.811	148.081	300.988	253.243	281.25	245.373	211.499	176.716	170.311	341.789	252.464	72.9439	276.042	287.226	187.739
685	285.956	270.885	274.758	178.238	227.015	293.78	272.28	308.914	391.109	311.694	202.745	311.176	331.654	196.177	274.842	214.822	139.526	223.281	207.457	316.525	182.503	326.865	351.35	150.605	259.625	225.961	150.019	219.496	263.372	301.593	225.331	204.944	237.185	203.121	190.55	147.819	300.422	252.246	280.947	246.821	211.243	176.05	170.558	341.002	252.495	72.5333	273.873	287.696	189.116
686	283.826	269.285	274.172	177.385	225.059	292.707	273.67	309.69	390.283	309.985	208.081	309.659	333.173	197.182	274.325	213.732	139.01	228.128	207.249	317.117	181.433	327.279	352.335	153.551	256.971	224.336	149.478	215.686	259.962	302.434	225.792	203.777	237.436	204.029	190.416	147.765	299.744	251.214	280.581	248.215	210.778	175.424	170.848	340.255	252.506	72.1226	271.663	287.852	190.588
687	285.431	269.822	276.787	177.492	223.103	291.101	274.783	310.532	389.136	310.412	209.68	308.19	333.091	197.605	277.539	213.175	138.438	233.094	208.109	317.638	175.561	327.305	356.523	156.545	261.786	224.314	149.012	212.172	256.66	302.883	226.704	203.147	237.799	204.921	190.468	147.919	298.932	249.968	280.215	249.369	210.198	174.741	171.16	339.591	252.502	71.8352	269.419	287.474	192.154
688	284.369	268.758	277.804	176.852	221.362	292.695	275.404	311.47	387.563	311.904	213.413	306.808	333.543	198.076	278.087	212.62	137.834	238.06	208.649	317.696	174.491	327.078	353.774	159.297	265.003	227.492	148.572	209.132	253.037	303.546	227.535	205.717	238.78	205.817	190.752	148.278	297.968	248.579	280.038	250.504	209.617	174.024	171.446	338.721	252.528	71.7941	267.179	286.814	193.751
689	284.373	267.691	278.286	175.786	219.62	292.69	275.471	312.506	385.455	310.195	219.815	305.505	333.461	198.596	280.768	213.663	137.224	243.263	209.829	317.469	172.889	326.735	355.826	162.194	263.415	225.334	148.112	205.915	249.201	303.96	228.488	207.755	240.127	206.743	191.316	148.786	296.833	247.333	279.766	251.456	209.106	173.269	171.71	337.523	252.593	71.5477	264.955	286.028	195.536
690	284.378	266.627	278.235	174.613	217.985	288.947	274.854	313.64	383.668	310.621	223.017	304.337	331.245	198.922	283.985	216.308	136.614	248.347	211.65	316.994	172.886	326.693	353.077	164.897	262.363	223.71	147.641	202.638	244.617	304.552	229.154	205.523	241.895	207.714	192.198	149.411	295.528	246.123	279.4	252.389	208.571	172.53	171.966	336.119	252.715	71.5887	262.817	284.897	197.479
691	286.518	268.23	278.184	174.293	216.99	289.475	273.96	314.856	382.414	312.649	225.682	303.557	332.23	198.908	285.6	213.082	136.004	253.194	213.364	316.661	175.02	327.087	350.86	167.406	261.843	223.686	147.175	200.31	240.14	305.215	229.697	206.491	243.915	208.723	193.426	150.093	294.094	244.806	279.066	253.101	208.107	171.763	172.264	334.798	252.864	71.3014	260.821	283.608	199.453
692	284.921	269.3	281.866	172.906	216.529	285.199	272.916	316.148	380.948	314.142	227.281	302.933	333.216	198.651	288.815	212.528	135.438	258.1	214.864	316.292	169.681	327.55	351.312	169.867	262.923	225.799	146.703	198.812	236.624	306.056	230.24	209.063	246.441	209.788	195.005	150.806	292.586	244.058	278.826	253.758	207.642	171.029	172.649	333.682	253.043	70.7677	258.988	282.226	201.395
693	283.858	271.438	280.749	171.199	216.068	280.39	272.065	317.453	379.374	316.701	229.948	302.279	332.601	198.346	291.499	211.97	134.847	263.185	217.112	315.852	171.815	327.808	350.696	172.521	262.937	225.776	146.162	197.907	233.427	306.932	230.947	211.101	248.968	210.898	196.938	151.513	291.036	243.417	278.899	254.176	207.247	170.341	173.114	332.361	253.192	70.3982	257.317	280.31	203.4
694	283.33	274.107	281.231	170.026	216.034	279.849	271.512	318.753	377.48	316.593	228.345	301.538	331.45	198.042	294.179	211.412	134.256	267.913	220	315.448	170.745	327.64	347.947	175.273	262.95	223.617	145.615	197.062	229.804	307.809	231.572	211.003	251.634	212.036	199.22	152.18	289.463	242.74	278.847	254.428	206.782	169.804	173.66	331.286	253.251	69.8235	255.848	278.52	205.249
695	283.335	273.044	282.245	169.28	216.106	277.176	271.323	320.035	375.373	315.951	231.547	300.526	330.303	197.882	294.727	214.058	133.639	272.286	223.315	315.221	173.411	326.948	347.865	177.733	262.964	221.459	145.017	196.809	227.356	308.863	232.074	214.64	254.329	213.191	201.826	152.743	287.863	242.206	278.952	254.46	206.387	169.43	174.274	330.047	253.192	69.2898	254.555	276.258	206.94
696	282.271	274.112	282.193	168.107	216.286	278.235	271.069	321.285	372.839	315.842	233.677	298.727	329.686	197.577	295.274	215.101	133.029	276.481	226.95	315.031	173.943	326.042	345.649	180.291	262.977	219.833	144.439	196.972	225.12	309.74	232.329	217.746	256.995	214.36	204.74	153.169	286.182	241.458	279.152	254.344	206.015	169.158	174.923	328.603	253.076	69.0435	253.496	273.809	208.569
697	284.411	275.715	281.076	168	216.786	275.563	270.752	322.409	370.304	314.668	235.278	296.734	328.003	197.272	297.423	214.545	132.407	280.972	230.585	314.626	177.678	325.233	339.695	182.363	264.06	217.678	143.841	198.024	222.137	310.936	232.749	218.717	259.634	215.504	207.951	153.447	284.342	240.816	279.319	254.026	205.666	168.975	175.572	327.281	252.884	68.7151	252.667	271.045	210.103
698	286.016	275.718	280.49	167.681	217.712	277.69	270.114	323.445	368.197	314.559	236.877	294.8	328.456	197.064	299.572	215.056	131.828	285.464	234.22	314.151	180.343	324.356	339.082	184.387	267.809	214.985	143.256	199.728	219.048	311.706	232.881	221.82	262.16	216.602	211.442	153.583	282.287	240.033	279.77	253.542	205.317	168.899	176.238	325.591	252.657	68.5099	252.059	268.03	211.606
699	284.42	277.322	277.769	167.362	218.105	276.617	269.199	324.346	366.197	317.654	236.342	293.079	333.178	196.323	297.985	215.032	131.237	289.659	237.322	313.639	183.01	323.276	338.465	186.605	267.289	213.36	142.671	202.085	216.599	312.262	232.973	225.458	264.546	217.643	215.19	153.588	279.988	239.178	280.377	253.113	205.061	168.812	176.933	323.859	252.476	68.3456	251.686	264.921	212.795
700	284.424	279.458	276.649	167.149	219.992	272.875	268.156	325.076	364.09	318.081	240.607	291.63	332.029	195.387	298.533	215.009	130.621	293.676	240.743	313.377	183.542	321.682	337.315	188.58	268.903	214.938	142.099	204.56	214.043	312.818	233.064	227.495	266.763	218.614	219.165	153.501	277.447	238.466	281.079	252.555	205.061	168.663	177.646	321.799	252.334	68.1403	251.583	261.498	213.702
701	288.165	279.995	278.733	167.044	221.025	272.337	267.326	325.574	362.089	314.769	240.606	290.608	334.081	194.451	296.945	218.722	129.998	297.159	244.058	313.222	188.343	319.767	334.567	190.459	270.519	217.05	141.527	207.45	211.808	313.375	233.114	230.067	268.784	219.513	223.341	153.341	274.718	237.611	281.906	252.016	205.014	168.486	178.355	319.821	252.232	68.0582	251.724	257.793	214.388
702	288.17	282.132	278.681	166.084	221.631	270.196	266.624	325.863	360.623	311.46	243.273	289.663	335.6	193.904	296.959	217.099	129.382	300.049	248.014	313.209	193.144	317.502	335.551	192.24	272.669	215.427	140.998	210.637	209.893	314.216	232.959	231.57	270.579	220.358	227.68	153.118	271.881	236.863	282.89	251.256	205.036	168.269	179.084	317.843	252.19	68.2635	252.118	253.867	214.573
703	287.64	284.269	280.232	165.871	222.238	269.655	266.179	325.919	359.156	310.284	242.203	288.689	334.985	193.308	295.371	215.474	128.753	302.525	251.649	313.409	196.344	315.151	333.869	193.876	273.749	216.471	140.514	214.357	208.939	314.914	233.092	232.008	272.403	221.169	232.138	152.843	269.015	236.116	283.937	250.496	204.989	168.002	179.793	315.7	252.183	68.2225	252.766	249.879	214.349
704	291.916	282.669	280.18	167.046	223.484	271.785	265.925	325.744	357.582	308.04	240.6	287.647	335.97	192.275	294.317	211.181	128.155	305.178	255.498	313.717	196.877	312.916	331.654	195.075	273.763	214.313	140.01	218.434	207.984	315.755	233.47	235.112	274.115	221.949	236.688	152.525	266.177	235.297	285.109	249.7	205.012	167.746	180.501	313.271	252.213	68.3044	253.69	245.734	213.906
705	294.053	284.808	280.128	168.007	223.877	273.912	265.842	325.309	356.222	306.865	238.465	286.606	339.625	190.757	292.73	213.291	127.633	307.712	259.454	314.095	202.745	311.176	333.173	196.177	274.842	214.822	139.526	223.281	207.457	316.525	233.685	236.081	275.461	222.696	241.291	152.178	263.407	234.584	286.156	248.921	205.173	167.446	181.197	310.636	252.271	68.674	254.864	241.338	213.18
706	294.059	284.811	277.941	168.969	224.697	279.776	265.717	324.674	354.969	307.824	237.394	285.69	340.61	188.851	295.413	215.938	127.168	310.247	263.836	314.58	208.081	309.659	333.091	197.182	274.325	213.732	139.01	228.128	207.249	317.117	233.982	241.32	276.724	223.399	245.891	151.806	260.702	233.979	286.92	248.161	205.544	167.15	181.91	307.96	252.342	69.0845	256.213	236.503	212.234
707	292.461	283.745	277.889	170.677	225.517	282.973	265.698	323.835	353.715	301.312	236.86	285.153	341.596	186.945	292.757	215.914	126.74	312.247	267.898	315.03	209.68	308.19	333.543	197.605	277.539	213.175	138.438	233.094	208.109	317.638	234.401	240.155	277.536	224.06	250.408	151.383	258.047	233.16	287.967	247.457	205.636	166.867	182.627	305.038	252.407	69.4128	257.741	231.761	210.88
708	295.669	282.147	279.439	172.492	226.337	286.168	265.765	322.792	352.995	297.469	234.188	284.713	345.251	184.894	290.103	215.358	126.356	313.892	272.387	315.622	213.413	306.808	333.461	198.076	278.087	212.62	137.834	238.06	208.649	317.696	234.862	243.793	277.928	224.67	254.76	150.896	255.422	232.127	288.951	246.605	205.891	166.588	183.361	302.526	252.472	69.6592	259.458	226.831	209.244
709	298.876	282.682	279.387	173.347	226.516	286.162	265.853	321.564	353.129	298.429	232.585	284.215	343.035	183.036	287.448	213.199	126.009	315.419	277.303	316.427	219.815	305.505	331.245	198.596	280.768	213.663	137.224	243.263	209.829	317.469	235.405	243.697	277.814	225.241	258.837	150.353	252.819	231.166	289.966	245.716	206.377	166.293	184.133	300.425	252.475	69.8234	261.349	221.682	207.45
710	299.947	281.617	278.802	174.415	227.336	291.492	265.77	320.163	353.904	300.455	231.518	283.61	344.02	181.373	286.395	215.311	125.694	316.708	282.005	317.09	223.017	304.337	332.23	198.922	283.985	216.308	136.614	248.347	211.65	316.994	235.825	246.267	277.39	225.795	262.534	149.762	250.229	230.169	290.668	244.938	206.701	166.065	184.983	298.406	252.428	70.1518	263.385	216.909	205.469
711	303.689	282.154	278.75	175.697	228.583	292.021	265.559	318.619	354.999	300.348	229.38	282.879	342.872	179.758	286.409	214.22	125.404	318.116	286.067	317.895	225.682	303.557	333.216	198.908	285.6	213.082	136.004	253.194	213.364	316.661	236.409	249.372	276.546	226.341	265.757	149.135	247.674	229.279	291.558	244.141	207.072	165.821	185.892	296.345	252.314	70.316	265.599	211.822	203.424
712	305.826	278.954	278.698	177.405	229.723	297.352	265.028	316.959	356.308	297.571	227.777	281.827	342.79	178.24	284.821	213.664	125.121	319.287	289.489	318.807	227.281	302.933	332.601	198.651	288.815	212.528	135.438	258.1	214.864	316.292	236.91	249.809	275.589	226.878	268.433	148.515	245.181	228.531	292.322	243.381	207.35	165.576	186.861	294.326	252.177	70.3571	267.99	207.018	201.066
713	307.433	280.023	280.248	178.474	230.97	302.149	264.347	315.168	356.869	296.929	229.376	280.737	343.241	176.528	285.902	214.708	124.85	319.924	292.911	319.968	229.948	302.279	331.45	198.346	291.499	211.97	134.847	263.185	217.112	315.852	237.412	251.311	274.323	227.418	270.511	147.931	242.778	227.783	292.992	242.823	207.651	165.264	187.902	292.471	252.033	70.4392	270.537	202.59	198.676
714	310.106	280.56	277.526	179.542	232.11	311.216	263.538	313.281	356.683	296.287	230.976	279.492	344.228	174.865	281.646	213.083	124.579	320.442	295.799	321.236	228.345	301.538	330.303	198.042	294.179	211.412	134.256	267.913	220	315.448	238.078	252.815	272.692	227.979	271.951	147.399	240.474	227.213	293.725	242.395	207.952	164.907	188.974	290.493	251.919	70.1519	273.196	198.1	196.349
715	313.847	280.027	277.474	179.969	233.143	313.878	262.836	311.333	356.497	296.713	230.974	278.305	343.612	173.735	276.323	213.594	124.283	320.308	298.474	322.255	231.547	300.526	329.686	197.882	294.727	214.058	133.639	272.286	223.315	315.221	238.867	254.318	270.949	228.577	272.728	146.941	238.291	226.643	294.458	242.077	208.322	164.494	190.066	288.474	251.827	69.9876	275.905	193.923	194.054
716	313.851	279.496	276.891	180.931	233.322	319.743	262.348	309.334	356.845	296.072	229.905	277.38	341.929	173.042	271	215.706	123.949	320.174	301.789	323.416	233.677	298.727	328.003	197.577	295.274	215.101	133.029	276.481	226.95	315.031	239.738	254.222	269.009	229.253	272.837	146.61	236.216	226.286	294.94	242.034	208.716	164.092	191.155	286.701	251.763	69.9056	278.639	189.904	191.978
717	314.39	278.967	278.441	181.892	234.142	320.803	262.201	307.27	357.086	294.362	228.834	276.842	343.982	172.834	272.081	213.548	123.647	320.04	305.425	324.541	235.278	296.734	328.456	197.272	297.423	214.545	132.407	280.972	230.585	314.626	240.528	252.523	267.069	230.049	272.289	146.437	234.232	226.036	295.359	241.992	209.063	163.707	192.256	285.133	251.688	70.1109	281.355	186.104	189.651
718	316.529	279.5	279.456	184.028	234.749	326.136	262.011	305.192	357.754	296.389	230.434	276.771	347.103	172.965	272.094	211.925	123.37	319.61	308.739	325.703	236.877	294.8	333.178	197.064	299.572	215.056	131.828	285.464	234.22	314.151	241.686	254.026	265.073	230.985	271.106	146.458	232.326	225.929	295.841	242.116	209.364	163.429	193.404	283.566	251.573	70.193	284.025	182.556	187.261
719	318.136	277.903	279.938	186.377	235.782	328.262	261.843	303.151	359.169	297.349	231.5	277.389	348.088	173.34	272.108	211.901	123.086	319.18	312.267	326.864	236.342	293.079	332.029	196.323	297.985	215.032	131.237	289.659	237.322	313.639	242.721	256.597	262.852	232.056	269.333	146.687	230.5	225.928	295.788	242.368	209.642	163.235	194.612	282.491	251.364	70.0287	286.645	179.321	184.965
720	317.606	279.505	283.088	190.007	236.388	330.392	261.782	301.175	361.011	296.172	231.499	278.598	351.741	173.52	268.92	212.944	122.815	318.749	315.903	328.238	240.607	291.63	334.081	195.387	298.533	215.009	130.621	293.676	240.743	313.377	243.798	255.432	260.631	233.247	267.037	147.12	228.748	225.785	295.705	242.859	210.198	163.058	195.876	281.58	251.041	69.9876	289.226	176.495	182.889
721	318.144	282.177	283.569	193.103	236.887	333.053	261.806	299.255	362.745	300.334	233.096	280.031	352.194	174.282	273.737	211.856	122.62	318.259	320.071	329.649	240.606	290.608	335.6	194.451	296.945	218.722	129.998	297.159	244.058	313.222	244.751	255.334	258.354	234.522	264.273	147.706	227.086	225.606	295.496	243.461	211.126	162.914	197.208	280.752	250.614	69.9465	291.742	174.171	180.845
722	318.683	282.18	282.984	195.132	236.319	335.182	261.765	297.479	363.947	302.361	236.832	281.648	351.044	175.287	269.482	212.898	122.43	317.71	324.56	331.165	243.273	289.663	334.985	193.904	296.959	217.099	129.382	300.049	248.014	313.209	246.074	255.771	255.852	235.85	261.099	148.419	225.539	225.392	295.099	244.302	211.914	162.793	198.565	279.882	250.108	69.8644	294.129	172.192	178.989
723	321.889	285.384	281.331	197.268	234.898	338.912	261.875	295.832	365.256	304.387	237.897	283.333	349.362	176.583	266.293	212.34	122.241	316.627	328.623	332.362	242.203	288.689	335.97	193.308	295.371	215.474	128.753	302.525	251.649	313.409	247.151	257.276	253.266	237.211	257.57	149.211	224.125	225.356	294.89	245.327	212.54	162.672	199.914	279.135	249.529	69.8644	296.403	170.715	177.321
724	320.293	288.054	277.544	199.51	234.01	341.041	262.176	294.311	365.603	303.746	240.03	284.572	348.214	178.462	265.239	216.054	122.064	315.188	332.044	333.416	240.6	287.647	339.625	192.275	294.317	211.181	128.155	305.178	255.498	313.717	248.309	258.778	250.849	238.604	253.742	150.043	222.847	225.248	294.367	246.518	213.258	162.613	201.271	278.799	248.964	69.9464	298.523	169.458	176.061
725	318.162	293.928	276.425	201.005	233.229	339.435	262.457	292.916	365.417	299.902	238.96	285.801	345.465	180.582	265.787	213.895	121.938	313.276	334.826	334.399	238.465	286.606	340.61	190.757	292.73	213.291	127.633	307.712	259.454	314.095	249.673	259.747	248.431	240.024	249.664	150.878	221.725	225.354	293.782	247.635	213.815	162.633	202.633	278.71	248.434	70.1928	300.46	168.547	175.21
726	322.438	297.666	280.641	202.5	232.554	338.36	262.545	291.664	364.911	303.53	245.363	287.282	344.314	183.043	264.734	213.873	121.786	311.541	336.753	335.276	237.394	285.69	341.596	188.851	295.413	215.938	127.168	310.247	263.836	314.58	250.955	258.048	245.93	241.457	245.402	151.691	220.753	225.674	293.102	248.808	214.278	162.686	203.999	278.99	247.944	70.4802	302.179	167.761	174.578
727	318.706	299.803	278.99	204.636	231.133	336.22	262.376	290.509	364.619	308.226	246.428	288.773	344.768	185.649	258.343	210.648	121.622	309.45	338.254	335.939	236.86	285.153	345.251	186.945	292.757	215.914	126.74	312.247	267.898	315.03	252.237	259.552	243.653	242.873	241.019	152.428	219.907	226.1	292.485	250.017	214.649	162.767	205.369	279.475	247.465	70.9728	303.677	167.164	174.041
728	316.042	301.405	281.073	206.558	229.924	335.145	262.059	289.475	364.433	308.651	249.628	290.342	344.151	188.4	254.62	211.159	121.496	307.3	339.647	336.424	234.188	284.713	343.035	184.894	290.103	215.358	126.356	313.892	272.387	315.622	253.478	261.59	241.628	244.23	236.576	153.058	219.145	226.668	291.93	251.355	215.019	162.876	206.761	280.206	246.95	71.2192	304.918	166.817	173.911
729	315.513	304.611	282.623	207.306	228.503	333.538	261.656	288.539	363.926	311.211	249.626	292.444	345.138	191.298	254.633	209	121.457	304.497	342.322	336.518	232.585	284.215	344.02	183.036	287.448	213.199	126.009	315.419	277.303	316.427	254.719	262.025	239.801	245.474	232.138	153.571	218.407	227.13	291.345	252.675	215.39	162.941	208.131	281.225	246.416	71.2602	305.931	166.816	174.315
730	312.847	308.883	280.435	208.161	227.401	328.729	261.21	287.709	362.673	312.169	251.759	294.585	346.122	194.826	251.979	209.51	121.431	301.636	344.676	336.718	231.518	283.61	342.872	181.373	286.395	215.311	125.694	316.708	282.005	317.09	256	264.597	237.861	246.561	227.758	153.971	217.608	227.521	291.01	253.81	215.737	163.011	209.484	282.531	245.873	71.3423	306.729	166.878	175.034
731	309.651	313.154	279.318	208.802	226.513	324.988	260.978	286.94	361.099	308.86	252.825	296.687	346.041	198.936	250.392	208.954	121.424	298.537	346.497	336.812	229.38	282.879	342.79	179.758	286.409	214.22	125.404	318.116	286.067	317.895	256.872	266.101	235.921	247.458	223.484	154.255	216.686	227.733	290.393	254.964	215.899	163.103	210.825	284.248	245.337	71.4244	307.328	167.191	175.752
732	309.122	315.826	277.665	209.229	226.479	322.847	261.237	286.245	358.992	309.287	256.024	299.042	346.493	203.191	251.474	209.998	121.423	295.557	347.57	336.692	227.777	281.827	343.241	178.24	284.821	213.664	125.121	319.287	289.489	318.807	257.579	268.138	234.093	248.146	219.366	154.429	215.596	228.053	289.839	256.137	215.852	163.218	212.139	285.964	244.851	71.6708	307.755	167.817	176.564
733	308.593	317.428	277.613	209.016	227.193	319.639	261.858	285.62	356.031	311.845	256.557	301.58	348.012	207.787	248.287	207.84	121.428	292.458	349.284	336.324	229.376	280.737	344.228	176.528	285.902	214.708	124.85	319.924	292.911	319.968	258.163	268.574	232.799	248.606	215.45	154.477	214.341	228.408	289.473	257.162	215.944	163.311	213.42	287.804	244.467	71.9583	307.979	168.57	177.376
734	306.462	319.033	277.561	210.085	228.119	315.363	262.523	285.013	353.497	313.339	259.221	304.527	345.262	212.528	244.563	208.884	121.389	289.419	349.717	335.812	230.976	279.492	343.612	174.865	281.646	213.083	124.579	320.442	295.799	321.236	259.034	269.544	231.393	248.821	211.78	154.395	212.966	228.55	288.982	258.113	216.152	163.387	214.649	289.603	244.133	72.3688	307.972	169.605	178.565
735	306.467	319.036	276.441	210.939	228.299	310.02	263.209	284.387	351.284	310.563	261.355	308.444	345.179	217.171	244.043	206.725	121.319	286.023	350.15	334.875	230.974	278.305	341.929	173.735	276.323	213.594	124.283	320.308	298.474	322.255	259.659	270.512	230.071	248.768	208.375	154.177	211.535	229.118	288.459	258.954	216.337	163.445	215.789	291.525	243.805	72.6153	307.758	170.922	179.849
736	300.601	321.171	274.253	212.114	228.798	308.413	263.681	283.803	348.749	306.719	266.692	312.991	347.233	221.912	241.921	208.838	121.268	282.687	350.904	333.83	229.905	277.38	343.982	173.042	271	215.706	123.949	320.174	301.789	323.416	260.613	267.749	228.89	248.436	205.257	153.839	210.083	229.793	288.25	259.593	216.452	163.476	216.817	293.57	243.476	72.6563	307.338	172.24	181.289
737	303.275	321.174	274.736	213.182	229.404	299.867	263.811	283.252	345.895	307.68	270.425	317.713	350.888	226.604	243.004	210.416	121.248	279.114	351.551	332.642	228.834	276.842	347.103	172.834	272.081	213.548	123.647	320.04	305.425	324.541	261.32	269.784	227.849	247.806	202.424	153.418	208.637	230.576	287.947	260.25	216.475	163.484	217.756	296.108	243.07	72.7795	306.74	173.557	182.792
738	301.144	321.71	272.017	214.464	229.904	297.194	263.601	282.738	342.827	311.305	273.625	322.63	346.536	231.685	243.017	208.791	121.191	276.134	351.45	331.882	230.434	276.771	348.088	172.965	272.094	211.925	123.37	319.61	308.739	325.703	261.986	268.62	227.116	246.898	199.856	152.955	207.165	231.251	287.832	260.76	216.335	163.537	218.602	298.933	242.693	72.7385	306.008	174.781	184.483
739	297.411	318.51	268.763	214.785	230.297	292.916	263.347	282.266	339.225	313.333	274.157	327.449	345.921	236.474	241.962	206.632	121.108	273.153	350.923	331.122	231.5	277.389	351.741	173.34	272.108	211.901	123.086	319.18	312.267	326.864	262.816	269.589	226.525	245.733	197.526	152.476	205.597	232.104	288.031	261.012	216.241	163.68	219.383	301.676	242.319	72.7385	305.156	176.192	185.986
740	296.351	315.31	265.511	215.106	230.369	293.979	262.986	281.896	334.983	311.624	279.492	331.598	349.574	241.118	238.775	208.744	120.988	270.469	349.755	330.327	231.499	278.598	352.194	173.52	268.92	212.944	122.815	318.749	315.903	328.238	263.564	270.559	226.186	244.34	195.428	152.004	203.875	232.637	288.387	261.228	216.032	163.874	220.095	304.788	242	72.6154	304.154	177.698	187.583
741	299.556	317.447	267.059	215	230.015	290.237	262.668	281.586	330.848	317.386	281.089	335.331	349.492	245.18	238.788	206.587	120.849	267.311	348.159	329.638	233.096	280.031	351.044	174.282	273.737	211.856	122.62	318.259	320.071	329.649	264.23	272.597	226.156	242.748	193.552	151.572	202.002	232.956	288.806	261.315	215.799	164.107	220.778	308.229	241.724	72.5744	303.035	179.267	189.117
742	298.494	312.648	263.272	214.574	230.195	289.697	262.329	281.299	326.926	317.279	282.157	338.869	348.878	249.047	239.337	208.698	120.666	264.687	346.458	329.055	236.832	281.648	349.362	175.287	269.482	212.898	122.43	317.71	324.56	331.165	264.814	274.102	226.267	240.994	191.876	151.221	200	233.133	289.037	261.236	215.52	164.379	221.376	311.875	241.514	72.5334	301.806	180.992	190.464
743	298.498	305.712	262.151	213.721	230.16	289.692	262.118	281.073	323.217	321.441	284.289	342.204	349.862	252.235	239.884	210.276	120.501	262.003	344.649	328.402	237.897	283.333	348.214	176.583	266.293	212.34	122.241	316.627	328.623	332.362	264.988	274.004	226.433	239.09	190.392	151.001	197.947	233.311	289.299	260.917	215.078	164.618	221.854	315.193	241.254	72.4513	300.443	182.875	191.621
744	297.969	304.113	261.033	213.082	230.34	288.618	261.95	280.911	319.936	325.068	286.421	345.373	349.247	254.744	239.899	207.05	120.35	259.319	342.841	327.784	240.03	284.572	345.465	178.462	265.239	216.054	122.064	315.188	332.044	333.416	264.956	273.372	226.825	237.056	189.101	150.95	195.978	233.844	289.844	260.489	214.358	164.845	222.191	318.634	241.01	72.2871	298.955	185.009	192.779
745	301.176	300.914	259.381	212.442	230.84	287.011	261.888	280.773	316.761	322.825	288.554	348.261	348.634	256.477	236.708	206.493	120.185	257.05	341.246	327.024	238.96	285.801	344.314	180.582	265.787	213.895	121.938	313.276	334.826	334.399	265.006	274.34	227.441	234.926	187.991	151.08	194.212	234.448	290.545	259.968	213.592	165.055	222.391	322.075	240.788	71.9998	297.374	187.174	193.685
746	302.25	295.045	256.66	211.909	231.339	288.605	261.933	280.691	313.373	324.317	287.486	350.81	349.083	257.676	236.722	205.938	119.977	255.256	338.904	326.086	245.363	287.282	344.768	183.043	264.734	213.873	121.786	311.541	336.753	335.276	265.221	274.777	228.113	232.736	187.048	151.379	192.715	235.194	291.372	259.466	212.779	165.283	222.408	325.844	240.568	71.7123	295.759	189.15	194.372
747	303.855	294.512	256.609	211.376	231.305	290.735	262.171	280.687	310.092	325.278	288.016	353.067	350.071	258.293	236.735	206.981	119.775	253.462	336.348	325.148	246.428	288.773	344.151	185.649	258.343	210.648	121.622	309.45	338.254	335.939	264.655	276.815	229.038	230.521	186.28	151.815	191.536	236.012	291.948	258.853	211.827	165.51	222.305	329.901	240.398	71.5071	294.112	191.19	194.965
748	305.992	290.781	255.488	210.843	231.164	292.861	262.344	280.73	307.024	323.035	287.482	354.985	350.522	258.425	239.419	206.424	119.573	252.083	332.832	324.423	249.628	290.342	345.138	188.4	254.62	211.159	121.496	307.3	339.647	336.424	263.884	276.183	229.964	228.327	185.695	152.348	190.69	236.722	292.649	258.075	210.991	165.782	222.113	334.368	240.273	71.3017	292.474	193.355	195.557
749	308.133	285.978	255.971	210.097	230.062	296.058	262.411	280.833	303.743	323.993	289.613	356.553	350.439	257.392	236.231	208.001	119.422	250.941	329.209	323.734	249.626	292.444	346.122	191.298	254.633	209	121.457	304.497	342.322	336.518	262.744	279.823	231.198	226.201	185.284	152.944	190.142	237.754	293.414	257.112	210.155	166.077	221.852	338.917	240.133	71.3017	290.851	195.363	196.119
750	310.272	282.246	254.318	209.457	228.961	300.856	262.413	281.043	301.209	322.284	291.213	357.85	352.494	255.68	236.244	207.979	119.352	250.688	325.373	323.223	251.759	294.585	346.041	194.826	251.979	209.51	121.431	301.636	344.676	336.718	261.481	281.861	232.544	224.189	185.032	153.594	189.839	238.535	294.178	256.095	209.342	166.389	221.583	343.221	239.956	71.0142	289.278	197.497	196.648
751	315.614	280.113	252.665	208.498	228.073	306.72	262.416	281.346	299.315	324.846	285.877	358.895	355.615	253.338	238.927	208.49	119.332	249.961	321.75	322.534	252.825	296.687	346.493	198.936	250.392	208.954	121.424	298.537	346.497	336.812	260.094	283.896	234.115	222.325	184.925	154.288	189.738	239.424	295.005	255.022	208.506	166.706	221.327	347.277	239.737	70.6037	287.708	199.474	196.99
752	318.821	281.182	251.544	207.645	226.971	308.85	262.504	281.765	298.168	323.669	283.204	359.619	356.067	250.558	236.804	206.331	119.4	249.649	317.593	321.596	256.024	299.042	348.012	203.191	251.474	209.998	121.423	295.557	347.57	336.692	258.625	284.332	235.434	220.647	184.932	155.003	189.793	240.206	295.55	253.802	207.577	167.074	221.079	351.211	239.424	70.1521	286.136	201.262	197.3
753	324.163	276.382	253.629	206.685	226.724	310.444	262.891	282.309	297.449	323.027	281.067	360.062	357.052	247.536	235.751	206.308	119.506	249.752	313.97	320.445	256.557	301.58	345.262	207.787	248.287	207.84	121.428	292.458	349.284	336.324	257.156	284.235	236.892	219.197	185.01	155.708	189.961	241.131	296.094	252.526	206.834	167.526	220.844	355.021	239.069	69.7827	284.592	203.207	197.641
754	326.834	274.784	253.577	205.938	226.156	314.174	263.641	283.034	297.476	323.453	281.065	360.292	356.97	244.417	232.029	206.284	119.637	249.915	309.706	319.009	259.221	304.527	345.179	212.528	244.563	208.884	121.389	289.419	349.717	335.812	255.688	284.137	238.463	218.011	185.131	156.385	190.208	242.091	296.733	251.343	206.23	167.972	220.613	358.462	238.747	69.4953	283.06	205.341	198.077
755	330.042	272.651	253.526	204.872	225.482	318.436	264.882	283.912	297.397	323.345	277.329	360.298	360.624	241.104	227.774	206.796	119.736	249.959	305.229	317.573	261.355	308.444	347.233	217.171	244.043	206.725	121.319	286.023	350.15	334.875	253.808	279.77	240.035	217.114	185.282	157.017	190.516	243.442	297.309	250.16	205.602	168.447	220.361	361.575	238.413	69.3311	281.547	207.506	198.575
756	336.45	273.188	255.609	203.805	224.7	320.566	266.315	284.953	297.745	323.238	274.657	360.15	362.142	237.84	229.388	208.374	119.798	250.418	300.112	315.781	266.692	312.991	350.888	221.912	241.921	208.838	121.268	282.687	350.904	333.83	252.299	281.807	241.325	216.547	185.436	157.6	190.868	244.864	297.602	248.995	204.929	168.955	220.066	365.057	238.141	69.0849	280.082	209.797	199.513
757	342.859	270.521	257.693	203.272	223.812	321.626	267.812	286.123	297.666	321.528	271.454	359.972	360.996	233.945	230.469	211.02	119.784	250.936	295.529	314.024	270.425	317.713	346.536	226.604	243.004	210.416	121.248	279.114	351.551	332.642	251.035	280.11	242.475	216.336	185.577	158.147	191.217	246.465	297.707	247.61	204.139	169.441	219.737	368.374	237.884	68.9207	278.697	211.93	200.482
758	341.263	273.192	258.174	202.098	222.07	324.823	269.394	287.419	297.48	320.886	269.316	359.687	360.914	230.049	231.551	208.861	119.714	251.573	290.945	312.411	273.625	322.63	345.921	231.685	243.017	208.791	121.191	276.134	351.45	331.882	249.772	281.612	243.512	216.498	185.699	158.675	191.495	248.03	297.875	246.334	203.442	169.848	219.361	371.405	237.68	68.7976	277.368	213.813	201.672
759	345.537	272.661	260.791	200.925	221.076	327.485	271.04	288.766	297.187	317.044	269.315	359.315	360.832	225.912	228.895	210.439	119.569	252.329	286.469	310.796	274.157	327.449	349.574	236.474	241.962	206.632	121.108	273.153	350.923	331.122	248.303	283.115	244.493	217.059	185.803	159.194	191.623	249.523	297.823	245.077	202.676	170.261	218.964	373.901	237.479	68.6745	276.136	215.476	202.986
760	351.945	270.529	265.007	198.898	220.081	329.615	272.751	290.15	297.641	317.468	268.245	358.855	361.285	222.065	227.843	205.613	119.43	253.796	281.778	309.111	279.492	331.598	349.492	241.118	238.775	208.744	120.988	270.469	349.755	330.327	247.245	283.018	245.306	218.036	185.891	159.696	191.514	251.301	297.803	243.784	201.863	170.69	218.545	376.234	237.315	68.5103	274.924	217.421	204.52
761	358.889	268.93	268.692	196.337	218.98	333.878	274.931	291.534	297.989	315.759	265.043	358.25	361.203	218.703	226.256	203.988	119.347	255.263	278.902	307.533	281.089	335.331	348.878	245.18	238.788	206.587	120.849	267.311	348.159	329.638	246.392	284.521	246.231	219.434	185.977	160.17	191.089	252.866	297.625	242.435	201.166	171.075	218.148	378.115	237.14	68.4283	273.717	219.304	206.275
762	358.361	266.263	273.443	192.496	217.878	334.938	277.666	292.951	298.657	316.185	263.972	357.5	359.518	215.73	226.802	205.566	119.29	256.79	275.599	306.168	282.157	338.869	349.862	249.047	239.337	208.698	120.666	264.687	346.458	329.055	245.621	286.025	247.325	221.257	186.097	160.612	190.331	254.253	297.165	241.178	200.423	171.425	217.737	379.585	236.997	68.3461	272.493	221.124	208.092
763	361.566	265.199	281.931	189.294	216.67	333.331	280.572	294.349	300.179	319.814	262.369	356.643	358.905	212.756	225.214	205.009	119.226	258.612	271.87	304.767	284.289	342.204	349.247	252.235	239.884	210.276	120.501	262.003	344.649	328.402	245.014	282.193	248.222	223.502	186.278	161.018	189.274	255.711	296.611	239.903	199.819	171.732	217.323	380.85	236.833	68.305	271.242	223.037	210.003
764	362.105	262.532	286.682	185.453	215.995	334.925	283.563	295.738	302.662	316.504	259.165	355.591	356.687	209.832	224.696	208.188	119.144	260.376	268.674	303.189	286.421	345.373	348.634	254.744	239.899	207.05	120.35	259.319	342.841	327.784	244.12	282.095	249.006	226.138	186.534	161.38	187.987	257.026	296.339	238.646	199.377	171.981	216.849	381.992	236.588	68.4691	269.97	224.889	211.945
765	361.576	260.401	293.036	181.611	215.641	335.988	286.384	297.075	305.358	315.327	258.631	354.239	353.938	207.198	220.439	209.233	119.08	262.14	265.478	301.397	288.554	348.261	349.083	256.477	236.708	206.493	120.185	257.05	341.246	327.024	243.226	280.929	250.044	229.13	186.868	161.702	186.555	258.413	296.224	237.463	199.168	172.136	216.34	382.929	236.293	68.6744	268.745	226.771	214.045
766	362.114	258.802	296.187	177.876	215.714	336.514	288.798	298.334	308.373	318.422	258.095	352.548	355.989	204.807	219.387	207.075	118.978	264.259	261.962	299.783	287.486	350.81	350.071	257.676	236.722	205.938	119.977	255.256	338.904	326.086	242.414	280.832	250.828	232.444	187.269	161.989	185.07	259.48	295.984	236.28	198.912	172.234	215.802	383.62	235.966	68.8796	267.551	228.748	216.081
767	364.253	254	299.869	173.821	215.786	336.509	290.701	299.514	312.457	312.443	256.491	350.341	348.97	202.755	218.331	207.584	118.826	266.438	260.046	298.595	288.016	353.067	350.522	258.293	236.735	206.981	119.775	253.462	336.348	325.148	241.643	278.067	251.641	236.044	187.703	162.236	183.593	260.688	295.681	235.17	198.54	172.287	215.272	384.31	235.633	69.2491	266.403	230.536	218.024
768	364.257	255.07	303.554	169.872	216.392	335.435	292.497	300.596	316.22	310.2	252.755	347.66	349.956	201.674	218.345	204.893	118.687	268.379	259.198	297.444	287.482	354.985	350.439	258.425	239.419	206.424	119.573	252.083	332.832	324.423	241.16	279.036	252.594	239.883	188.13	162.433	182.142	261.826	295.221	234.153	198.238	172.317	214.743	384.877	235.331	69.4542	265.341	232.482	220.311
769	361.06	252.403	308.305	166.137	216.358	334.895	294.229	301.572	319.45	310.092	249.549	344.561	349.34	201.32	214.624	205.936	118.523	270.262	258.03	296.434	289.613	356.553	352.494	257.392	236.231	208.001	119.422	250.941	329.209	323.734	240.512	277.873	253.463	243.926	188.521	162.574	180.737	262.751	294.855	233.043	198.028	172.309	214.213	385.075	235.093	69.4131	264.338	234.301	222.725
770	363.733	248.67	309.855	162.722	215.897	340.761	295.896	302.441	322.466	309.449	249.014	341.132	347.658	201.404	211.436	206.983	118.29	272.381	258.143	295.283	291.213	357.85	355.615	255.68	236.244	207.979	119.352	250.688	325.373	323.223	239.905	279.376	253.967	248.137	188.854	162.647	179.393	263.39	294.552	232.026	198.05	172.233	213.641	384.821	234.929	69.5362	263.328	236.121	225.044
771	359.469	247.071	315.14	159.521	215.436	341.821	297.479	303.198	324.948	308.809	249.011	337.316	347.041	202.263	206.113	209.627	118.025	274.738	257.615	294.274	285.877	358.895	356.067	253.338	238.927	208.49	119.332	249.961	321.75	322.534	239.052	277.677	254.724	252.471	189.108	162.643	178.118	263.888	294.217	231.082	198.003	172.061	213.021	384.731	234.82	69.9056	262.33	237.847	227.112
772	357.872	245.474	318.823	157.173	215.936	340.214	298.869	303.798	326.577	308.167	247.943	333.227	346.959	203.753	206.127	208.003	117.83	277.213	256.768	293.229	283.204	359.619	357.052	250.558	236.804	206.331	119.4	249.649	317.593	321.596	238.035	277.045	255.649	256.871	189.272	162.564	176.923	264.349	294.134	230.119	198.119	171.805	212.342	384.847	234.718	70.193	261.329	239.667	229.055
773	355.742	241.739	321.974	153.865	216.863	333.269	299.789	304.254	328.099	309.125	248.475	328.779	345.813	205.486	205.607	208.513	117.678	279.866	256.347	292.077	281.067	360.062	356.97	247.536	235.751	206.308	119.506	249.752	313.97	320.445	237.141	273.211	256.658	261.293	189.349	162.413	175.849	264.74	294.082	229.12	198.257	171.522	211.637	384.757	234.553	70.4393	260.286	241.235	230.715
774	356.813	238.007	322.991	150.237	217.362	331.131	300.24	304.543	329.62	306.349	246.872	324.099	343.062	207.85	209.355	206.355	117.633	282.223	258.168	291.103	281.065	360.292	360.624	244.417	232.029	206.284	119.637	249.915	309.706	319.009	236.288	274.181	257.78	265.698	189.347	162.192	174.917	265.166	294.03	228.139	198.373	171.193	210.928	384.298	234.358	70.7266	259.246	242.929	232.218
775	354.15	238.544	326.673	147.355	218.822	329.523	300.392	304.66	332.209	305.708	245.801	319.224	344.047	210.456	206.701	205.798	117.657	284.283	259.454	290.308	277.329	360.298	362.142	241.104	227.774	206.796	119.736	249.959	305.229	317.573	235.641	272.482	259.126	270.036	189.28	161.916	174.14	265.45	294.041	227.066	198.581	170.836	210.19	383.593	234.121	70.7677	258.241	244.435	233.281
776	351.487	238.011	330.892	144.688	220.069	330.584	300.309	304.582	334.692	302.398	242.064	314.292	346.102	213.353	207.248	204.708	117.713	285.987	261.489	289.441	274.657	360.15	360.996	237.84	229.388	208.374	119.798	250.418	300.112	315.781	234.747	271.317	260.585	274.267	189.173	161.598	173.522	266.09	294.648	226.03	198.673	170.501	209.399	383.01	233.826	70.8499	257.263	246.035	234.282
777	347.22	237.48	326.57	142.554	221.636	330.043	300.269	304.286	336.961	299.622	242.597	309.398	341.749	216.783	212.065	205.751	117.743	287.395	263.523	288.467	271.454	359.972	360.914	233.945	230.469	211.02	119.784	250.936	295.529	314.024	234.346	274.422	262.156	278.358	189.055	161.252	173.061	267.228	295.664	224.958	198.904	170.189	208.554	382.305	233.482	71.0552	256.325	247.353	235.063
778	347.225	238.55	330.79	142.021	223.309	328.971	300.485	303.759	339.764	299.513	242.06	304.727	339	220.311	214.214	203.059	117.742	288.506	265.557	287.351	269.316	359.687	360.832	230.049	231.551	208.861	119.714	251.573	290.945	312.411	233.821	266.319	263.728	282.262	188.96	160.897	172.718	268.365	296.805	224.032	199.321	169.827	207.636	381.682	233.119	71.1784	255.429	248.607	235.373
779	344.028	239.084	333.405	142.876	226.477	325.23	301.043	303.008	342.46	302.074	243.66	300.134	336.782	223.694	218.497	204.637	117.71	289.38	266.524	286.307	269.315	359.315	361.285	225.912	228.895	210.439	119.569	252.329	286.469	310.796	233.42	266.756	265.411	285.921	188.902	160.564	172.441	269.859	298.04	223.051	199.715	169.47	206.662	380.894	232.73	71.4248	254.568	249.925	235.4
780	341.898	242.29	332.821	144.691	230.073	327.357	301.814	302.081	343.982	300.899	236.721	295.676	335.634	227.27	221.181	204.081	117.69	290.017	268.985	285.618	268.245	358.855	361.203	222.065	227.843	205.613	119.43	253.796	281.778	309.111	233.06	264.524	266.926	289.285	188.897	160.281	172.165	271.388	299.589	221.905	200.271	169.153	205.671	379.86	232.34	71.4659	253.751	250.991	235.114
781	339.768	241.758	332.235	147.148	234.415	326.817	302.671	301.019	345.824	299.189	234.05	291.384	333.417	230.798	227.596	204.058	117.721	290.476	271.232	284.786	265.043	358.25	359.518	218.703	226.256	203.988	119.347	255.263	278.902	307.533	232.946	264.426	268.469	292.305	188.938	160.078	171.831	273.202	301.138	220.906	200.99	168.857	204.706	378.867	231.956	71.507	252.954	252.089	234.513
782	337.639	246.565	334.318	150.564	239.184	323.609	303.399	299.855	347.986	301.75	230.312	287.276	333.869	234.374	232.415	203.501	117.694	291.173	273.8	283.955	263.972	357.5	358.905	215.73	226.802	205.566	119.29	256.79	275.599	306.168	232.627	262.194	270.096	294.949	189.012	159.976	171.385	275.194	302.75	220.017	201.894	168.534	203.801	377.669	231.566	71.5481	252.149	252.999	233.662
783	334.44	251.905	334.266	155.261	243.846	319.867	304.021	298.631	349.401	303.778	228.176	283.314	334.321	237.805	234.029	204.545	117.612	291.454	277.329	283.301	262.369	356.643	356.687	212.756	225.214	205.009	119.226	258.612	271.87	304.767	232.554	261.564	271.696	297.199	189.088	159.988	170.804	277.292	304.613	219.183	202.775	168.217	202.981	376.841	231.16	71.1786	251.345	253.845	232.748
784	330.71	257.242	334.215	159.532	248.829	318.793	304.408	297.375	351.137	301.533	227.105	279.623	333.706	240.994	237.244	203.454	117.517	291.557	280.75	282.577	259.165	355.591	353.938	209.832	224.696	208.188	119.144	260.376	268.674	303.189	232.399	263.067	273.098	299.053	189.13	160.083	170.101	279.675	306.602	218.424	203.749	167.86	202.216	375.889	230.748	71.1786	250.51	254.535	231.833
785	331.248	257.779	333.094	164.549	254.025	316.653	304.603	296.067	353.086	299.29	229.239	276.214	333.624	243.988	240.461	203.432	117.428	291.897	283.211	281.888	258.631	354.239	355.989	207.198	220.439	209.233	119.08	262.14	265.478	301.397	232.408	261.901	274.501	300.529	189.105	160.24	169.314	282.379	308.716	217.719	204.793	167.43	201.516	374.567	230.351	71.2608	249.673	255.036	230.542
786	329.651	262.05	334.644	169.78	259.862	311.844	304.776	294.773	355.355	299.182	223.366	273.125	336.745	246.739	245.811	205.543	117.295	292.001	285.779	281.306	258.095	352.548	348.97	204.807	219.387	207.075	118.978	264.259	261.962	299.783	232.417	258.068	275.932	301.649	188.98	160.448	168.482	285.438	310.705	217.253	205.883	166.905	200.828	373.205	229.977	71.3019	248.835	255.757	229
787	329.656	264.187	332.991	175.864	265.378	309.168	305.099	293.508	357.089	301.744	227.1	270.317	334.528	249.249	247.426	208.189	117.187	291.985	287.813	280.652	256.491	350.341	349.956	202.755	218.331	207.584	118.826	266.438	260.046	298.595	232.057	255.302	276.941	302.43	188.743	160.706	167.648	288.532	312.913	216.843	206.787	166.317	200.157	372.171	229.648	71.0554	248.014	256.384	227.207
788	331.262	268.994	330.806	181.309	270.787	308.63	305.422	292.311	358.825	302.703	229.233	267.8	333.379	251.078	251.71	206.564	117.111	291.555	288.46	280.106	252.755	347.66	349.34	201.674	218.345	204.893	118.687	268.379	259.198	297.444	231.902	254.67	277.529	302.896	188.388	161.013	166.837	291.805	314.964	216.617	207.529	165.679	199.504	371.384	229.394	70.9733	247.189	256.665	225.476
789	329.132	270.063	324.883	188.141	276.517	308.623	305.851	291.203	360.24	301.527	229.231	265.556	333.831	252.811	258.128	204.405	116.99	291.006	289.64	279.595	249.549	344.561	347.658	201.32	214.624	205.936	118.523	270.262	258.03	296.434	231.501	251.905	278.567	303.076	187.923	161.406	166.06	294.935	316.671	216.611	208.294	164.997	198.948	369.98	229.207	71.0554	246.371	256.822	223.494
790	327	273.803	321.63	194.546	282.14	304.347	306.281	290.221	361.334	298.75	231.364	263.602	333.749	254.738	262.943	207.052	116.814	289.567	291.034	279.012	249.014	341.132	347.041	201.404	211.436	206.983	118.29	272.381	258.143	295.283	231.223	249.673	279.491	302.989	187.362	161.892	165.325	297.923	318.314	216.772	209.361	164.28	198.444	368.823	229.07	70.9734	245.536	257.291	221.356
791	327.54	274.337	322.645	202.872	287.443	303.274	306.497	289.349	362.003	299.177	229.762	261.939	333.134	255.549	265.093	205.427	116.599	287.536	293.281	278.644	249.011	337.316	346.959	202.263	206.113	209.627	118.025	274.738	257.615	294.274	231.355	251.175	280.192	302.653	186.728	162.464	164.648	300.875	319.926	217.061	210.497	163.547	197.979	367.584	228.938	70.8091	244.744	257.73	218.84
792	327.01	275.407	325.263	209.705	292.212	301.133	306.307	288.603	363.098	300.135	231.362	260.626	332.517	256.069	264.039	203.802	116.347	285.564	295.316	278.133	247.943	333.227	345.813	203.753	206.127	208.003	117.83	277.213	256.768	293.229	231.323	247.876	280.78	302.086	186.058	163.119	164.036	303.223	321.412	217.552	211.517	162.797	197.547	366.55	228.837	70.6037	243.97	258.388	216.419
793	324.348	277.011	323.076	216.11	297.514	298.991	305.818	287.969	364.086	300.027	230.825	259.643	332.437	255.861	266.188	204.847	116.101	283.236	297.99	277.693	248.475	328.779	343.062	205.486	205.607	208.513	117.678	279.866	256.347	292.077	231.209	249.38	281.171	301.293	185.388	163.887	163.504	305.464	322.71	218.173	212.468	162.002	197.154	365.516	228.766	70.3984	243.214	259.046	213.778
794	321.682	278.614	320.889	222.622	301.857	296.318	304.86	287.455	364.648	300.987	231.889	259.009	332.889	255.265	274.207	202.154	115.861	280.374	299.597	277.36	246.872	324.099	344.047	207.85	209.355	206.355	117.633	282.223	258.168	291.103	230.808	248.215	281.478	300.28	184.755	164.792	163.056	307.064	323.412	218.903	213.488	161.156	196.782	364.236	228.73	70.2341	242.478	259.736	211.012
795	323.287	273.28	316.568	229.347	305.345	293.109	303.688	287.061	365.422	303.015	231.887	258.636	334.408	254.426	278.49	203.2	115.596	277.631	300.884	277.169	245.801	319.224	346.102	210.456	206.701	205.798	117.657	284.283	259.454	290.308	230.612	246.516	281.729	299.057	184.194	165.889	162.674	308.237	323.517	219.744	214.3	160.288	196.505	363.079	228.734	70.2341	241.772	260.331	208.151
796	322.226	275.417	313.847	234.364	308.193	289.902	302.623	286.779	365.983	303.439	234.555	258.478	334.327	253.248	281.173	202.643	115.35	274.651	300.997	277.227	242.064	314.292	341.749	213.353	207.248	204.708	117.713	285.987	261.489	289.441	229.841	244.284	282.037	297.641	183.723	167.216	162.328	309.233	323.213	220.862	215.343	159.386	196.363	361.84	228.838	70.193	241.061	260.864	205.353
797	323.297	274.884	312.728	240.236	311.147	288.295	301.771	286.646	366.224	301.73	236.154	258.494	336.379	251.585	284.389	204.22	115.136	271.493	301.75	277.143	242.597	309.398	339	216.783	212.065	205.751	117.743	287.395	263.523	288.467	229.317	245.788	282.231	296.059	183.333	168.792	161.99	309.446	322.471	222.107	216.619	158.45	196.316	360.314	229.009	69.7825	240.343	261.616	202.618
798	321.701	272.22	314.277	246.32	313.675	285.618	300.962	286.666	366.465	304.824	235.618	258.733	338.967	249.436	285.47	205.264	114.909	268.216	301.757	276.952	242.06	304.727	336.782	220.311	214.214	203.059	117.742	288.506	265.557	287.351	228.833	245.156	282.314	294.347	183.009	170.593	161.643	309.16	321.352	223.409	217.778	157.453	196.359	359.033	229.175	69.454	239.613	262.243	199.883
799	325.44	269.02	309.423	251.017	316.202	284.013	300.261	286.871	366.386	305.251	238.819	259.127	342.622	246.899	286.017	203.639	114.719	264.998	302.19	276.797	243.66	300.134	335.634	223.694	218.497	204.637	117.71	289.38	266.524	286.307	228.432	243.991	282.537	292.541	182.727	172.611	161.29	308.341	319.918	224.728	218.891	156.456	196.474	357.589	229.324	69.0846	238.859	263.121	197.21
800	323.311	269.022	307.77	255.501	318.944	283.473	299.388	287.262	365.453	306.209	239.886	259.706	340.938	244.168	286.564	203.084	114.599	262.077	302.409	276.819	236.721	295.676	333.417	227.27	221.181	204.081	117.69	290.017	268.985	285.618	228.4	243.359	282.732	290.666	182.452	174.824	160.964	307.202	318.077	226.048	219.842	155.441	196.653	356.063	229.429	68.7974	238.072	264.156	194.413
801	323.85	266.355	303.981	259.238	321.898	282.933	298.089	287.843	364.84	306.636	243.084	260.489	339.256	240.953	284.976	201.992	114.473	258.86	303.056	276.984	234.05	291.384	333.869	230.798	227.596	204.058	117.721	290.476	271.232	284.786	228.409	242.728	282.618	288.736	182.151	177.235	160.716	305.351	315.89	227.46	220.677	154.427	196.9	354.782	229.444	68.3868	237.278	265.254	191.646
802	325.455	262.621	300.195	262.441	324.532	281.86	296.277	288.545	364.227	306.527	245.75	261.417	336.506	237.931	287.66	199.302	114.296	255.761	303.062	277.363	230.312	287.276	334.321	234.374	232.415	203.501	117.694	291.173	273.8	283.955	228.459	242.098	282.447	286.759	181.814	179.854	160.59	302.931	313.609	229.037	221.511	153.385	197.233	353.995	229.414	67.9763	236.521	266.728	188.911
803	323.859	257.821	295.875	265.43	326.739	278.65	294.081	289.326	363.508	309.086	247.883	262.432	335.889	234.86	286.605	201.414	114.125	253.077	302.428	277.705	228.176	283.314	333.706	237.805	234.029	204.545	117.612	291.454	277.329	283.301	228.058	243.067	282.192	284.734	181.432	182.689	160.613	299.941	311.266	230.541	222.16	152.37	197.621	352.673	229.384	67.6479	235.788	268.077	186.207
804	323.329	253.554	295.289	268.42	328.2	274.909	291.415	290.134	362.361	309.513	250.55	263.525	337.943	231.693	288.222	200.857	113.955	250.749	301.153	278.012	227.105	279.623	333.624	240.994	237.244	203.454	117.517	291.557	280.75	282.577	227.123	240.837	281.769	282.66	181.001	185.702	160.772	296.667	308.483	232.099	222.716	151.356	198.039	351.434	229.324	67.4426	235.123	269.206	183.723
805	323.334	250.888	293.102	270.022	329.873	273.302	288.664	290.957	361.534	309.404	254.818	264.667	338.929	228.234	289.836	201.368	113.778	248.955	300.092	278.284	229.239	276.214	336.745	243.988	240.461	203.432	117.428	291.897	283.211	281.888	226.352	241.271	281.15	280.539	180.524	188.851	161.024	292.86	305.385	233.585	223.226	150.398	198.478	350.113	229.267	67.2374	234.48	270.555	181.239
806	322.271	247.688	295.185	271.837	331.12	274.898	285.892	291.733	360.281	300.226	257.484	265.915	339.914	224.824	290.382	203.478	113.62	247.635	298.177	278.449	223.366	273.125	334.528	246.739	245.811	205.543	117.295	292.001	285.779	281.306	225.622	242.241	280.726	278.376	180.021	192.093	161.298	288.162	302.1	235.088	223.922	149.507	198.914	349.038	229.235	67.0732	233.85	272.092	178.787
807	322.81	242.353	289.261	273.119	331.727	272.756	283.226	292.472	358.387	300.651	257.483	267.261	339.832	221.56	289.863	204.523	113.537	246.315	296.261	279.112	227.1	270.317	333.379	249.249	247.426	208.189	117.187	291.985	287.813	280.652	224.728	241.075	280.781	276.179	179.504	195.384	161.522	283.394	298.94	236.463	224.64	148.707	199.362	348.005	229.104	67.1143	233.218	273.253	176.334
808	323.348	237.553	286.542	273.867	332.547	269.549	280.517	293.192	356.706	302.142	259.08	268.732	340.284	218.392	288.809	206.101	113.455	245.41	294.88	279.704	229.233	267.8	333.831	251.078	251.71	206.564	117.111	291.555	288.46	280.106	223.916	242.579	280.554	273.942	178.997	198.678	161.636	278.626	295.969	237.893	225.312	148.007	199.844	347.053	228.889	67.1143	232.585	274.319	174.29
809	321.219	233.819	283.823	273.975	334.007	269.008	278.001	293.861	356.094	304.704	259.613	270.32	340.204	215.661	286.155	206.078	113.404	244.565	293.605	280.438	229.231	265.556	333.749	252.811	258.128	204.405	116.99	291.006	289.64	279.595	223.186	241.949	280.159	271.671	178.54	201.962	161.625	273.857	292.62	239.323	225.869	147.42	200.39	346.224	228.6	67.6069	231.927	275.166	172.088
810	320.154	232.22	283.237	273.976	334.187	271.138	275.228	294.471	355.481	306.197	264.949	272.063	341.189	213.561	286.168	204.454	113.34	244.431	291.263	280.923	231.364	263.602	333.134	254.738	262.943	207.052	116.814	289.567	291.034	279.012	222.621	241.317	279.708	269.375	178.175	205.189	161.503	268.769	289.24	240.772	226.494	146.9	200.971	345.56	228.243	67.7711	231.265	275.918	169.887
811	321.761	226.352	279.449	273.656	333.726	272.731	272.028	295.024	355.189	306.621	267.615	273.845	342.174	211.364	286.716	203.362	113.257	244.535	288.921	281.301	229.762	261.939	332.517	255.549	265.093	205.427	116.599	287.536	293.281	278.644	222.178	241.754	279.313	267.066	177.934	208.299	161.289	263.573	286.018	241.907	227.074	146.43	201.619	344.813	227.815	67.8531	230.573	276.451	168.093
812	322.833	222.62	278.33	273.016	334.225	271.125	268.252	295.521	355.963	309.183	269.213	275.656	345.828	209.555	285.127	201.205	113.131	244.638	285.832	281.715	231.362	260.626	332.437	256.069	264.039	203.802	116.347	285.564	295.316	278.133	222.105	242.723	278.777	264.754	177.828	211.226	161.021	258.449	283.392	242.914	227.607	146.012	202.328	344.149	227.406	68.0583	229.889	276.826	166.457
813	322.839	220.486	277.209	271.309	333.764	271.653	264.071	295.908	356.844	310.141	270.28	277.516	348.949	207.843	282.473	205.45	112.916	244.8	282.849	282.378	230.825	259.643	332.889	255.861	266.188	204.847	116.101	283.236	297.99	277.693	222.032	241.559	278.214	262.461	177.858	213.911	160.731	253.183	280.922	243.847	228.024	145.666	203.058	343.361	226.979	68.3046	229.243	277.108	164.978
814	321.241	218.889	274.491	270.563	332.876	269.512	259.292	296.192	357.512	308.432	271.345	279.366	354.204	206.228	279.819	205.428	112.589	245.259	279.334	283.361	231.889	259.009	334.408	255.265	274.207	202.154	115.861	280.374	299.597	277.36	221.754	240.927	277.622	260.174	178.011	216.301	160.416	247.988	278.547	244.707	228.441	145.371	203.779	342.82	226.555	68.5919	228.619	277.075	163.686
815	322.847	215.153	273.373	268.962	332.415	269.506	254.107	296.346	358.5	308.325	271.878	281.255	352.522	205.244	272.895	206.472	112.192	245.54	276.778	284.273	231.887	258.636	334.327	254.426	278.49	203.2	115.596	277.631	300.884	277.169	222.05	239.764	276.918	257.888	178.233	218.362	160.059	242.721	276.329	245.401	228.927	145.149	204.543	342.238	226.099	68.8792	228.021	276.854	162.49
816	321.784	214.089	271.72	266.401	332.168	266.297	248.815	296.393	359.488	311.419	269.74	283.26	354.575	204.842	273.976	205.916	111.752	246.296	274.329	285.15	234.555	258.478	336.379	253.248	281.173	202.643	115.35	274.651	300.997	277.227	222.429	240.198	276.13	255.581	178.469	220.067	159.67	237.739	274.111	246.04	229.275	144.983	205.341	342.107	225.647	69.1255	227.424	276.226	161.45
817	322.322	210.891	272.201	263.413	330.959	264.69	243.63	296.292	360.157	312.379	271.874	285.313	361.431	204.779	271.854	203.222	111.286	247.644	272.948	286.168	236.154	258.494	338.967	251.585	284.389	204.22	115.136	271.493	301.75	277.143	223.013	244.372	275.313	253.241	178.662	221.395	159.242	232.793	272.018	246.605	229.622	144.873	206.173	342.141	225.239	69.3718	226.812	275.157	160.567
818	321.26	209.825	269.482	260.532	329.538	264.683	238.68	296.085	360.931	313.338	271.338	287.367	365.617	204.765	272.937	204.8	110.902	249.468	270.712	287.33	235.618	258.733	342.622	249.436	285.47	205.264	114.909	268.216	301.757	276.952	223.638	241.071	274.075	250.868	178.756	222.333	158.774	228.131	270.083	246.93	230.016	144.735	207.07	342.133	224.906	69.536	226.173	273.743	159.621
819	322.331	209.294	267.295	257.118	327.902	264.678	234.157	295.77	361.813	313.23	271.87	289.401	369.808	205.431	270.28	207.448	110.575	251.172	269.224	288.562	238.819	259.127	340.938	246.899	286.017	203.639	114.719	264.998	302.19	276.797	224.427	245.243	272.838	248.494	178.7	222.882	158.282	223.576	268.398	247.109	230.27	144.598	208.06	342.084	224.601	69.7003	225.532	271.702	158.832
820	321.269	209.297	264.04	254.237	326.16	263.603	229.997	295.33	362.908	312.588	271.869	291.348	376.129	206.193	268.162	206.89	110.291	252.994	267.415	289.83	239.886	259.706	339.256	244.168	286.564	203.084	114.599	262.077	302.409	276.819	225.38	240.342	271.684	246.137	178.463	223.06	157.791	219.306	266.965	247.141	230.246	144.494	209.123	342.077	224.357	69.8235	224.902	269.409	158.201
821	321.273	209.832	262.387	252.636	324.205	270.002	226.157	294.747	363.896	313.548	268.663	293.179	379.248	207.004	267.106	207.934	110.058	254.936	265.606	290.955	243.084	260.489	336.506	240.953	284.976	201.992	114.473	258.86	303.056	276.984	226.252	241.845	270.559	243.826	178.046	222.898	157.304	215.783	265.72	247.043	230.13	144.423	210.258	342.193	224.112	69.9054	224.293	267.21	157.569
822	321.812	209.301	262.87	250.289	322.784	268.928	222.467	294.056	364.99	314.506	264.392	295.01	384.505	208.349	262.318	205.776	109.862	257.056	264.225	291.867	245.75	261.417	335.889	237.931	287.66	199.302	114.296	255.761	303.062	277.363	227.451	241.749	269.293	241.582	177.458	222.429	156.831	212.296	264.978	246.743	229.99	144.358	211.488	342.349	223.841	69.9876	223.661	264.792	156.874
823	321.283	206.101	259.082	249.222	321.576	274.26	218.84	293.245	365.979	314.933	263.323	296.821	389.226	209.742	262.865	207.354	109.661	258.76	263.484	293.171	247.883	262.432	337.943	234.86	286.605	201.414	114.125	253.077	302.428	277.705	228.733	242.185	268.055	239.403	176.715	221.692	156.369	208.915	264.329	246.425	229.896	144.35	212.777	342.629	223.562	70.316	223.053	262.154	156.337
824	322.888	205.57	255.295	247.409	320.474	272.653	215.321	292.332	367.074	315.891	262.787	298.622	393.947	211.329	262.88	208.399	109.459	261.057	262.423	294.403	250.55	263.525	338.929	231.693	288.222	200.857	113.955	250.749	301.153	278.012	230.097	243.689	266.789	237.285	175.869	220.724	155.907	205.605	263.932	246.07	229.733	144.341	214.057	343.114	223.269	70.7266	222.461	259.579	156.019
825	321.292	210.91	256.843	245.702	319.266	269.445	212.143	291.382	366.888	316.318	264.386	300.453	400.804	213.45	258.089	206.24	109.294	263.355	261.255	295.564	254.818	264.667	339.914	228.234	289.836	201.368	113.778	248.955	300.092	278.284	230.969	241.99	265.467	235.234	174.968	219.558	155.436	202.971	263.409	245.42	229.64	144.259	215.253	343.928	222.93	70.9729	221.807	257.097	155.701
826	321.829	211.445	255.726	243.354	318.271	271.04	209.178	290.427	367.236	317.276	261.182	302.225	402.324	215.62	257.035	206.216	109.118	265.355	261.261	296.69	257.484	265.915	339.832	224.824	290.382	203.478	113.62	247.635	298.177	278.449	231.922	241.892	263.892	233.246	174.061	218.228	154.945	200.551	263.294	244.716	229.57	144.11	216.341	344.946	222.692	71.3013	221.084	254.773	155.697
827	321.834	211.98	254.074	242.288	317.49	271.568	206.576	289.518	367.904	316.101	259.578	303.794	408.112	218.177	253.848	205.66	108.935	266.941	260.84	297.602	257.483	267.261	340.284	221.56	289.863	204.523	113.537	246.315	296.261	279.112	232.547	241.26	262.149	231.329	173.19	216.779	154.428	198.558	263.18	244.011	229.337	143.939	217.31	345.842	222.5	71.753	220.336	252.481	156.007
828	321.839	211.983	254.022	240.154	316.815	270.494	204.294	288.684	368.251	317.595	259.043	305.256	414.435	220.686	255.461	207.238	108.808	268.408	260.633	298.3	259.08	268.732	340.204	218.392	288.809	206.101	113.455	245.41	294.88	279.704	233.049	242.764	260.293	229.488	172.405	215.249	153.919	197.063	263.19	243.214	229.011	143.728	218.172	346.861	222.312	72.2457	219.573	250.69	156.631
829	320.243	212.518	250.766	238.66	315.18	268.351	202.269	287.975	369.026	318.552	257.974	306.659	420.223	223.389	253.341	205.08	108.744	269.935	260.959	298.999	259.613	270.32	341.189	215.661	286.155	206.078	113.404	244.565	293.605	280.438	233.592	240.532	258.354	227.716	171.742	213.666	153.478	196.03	263.044	242.417	228.593	143.511	218.979	347.838	222.186	72.5743	218.787	248.868	157.569
830	319.715	214.123	251.249	236.633	313.758	268.88	200.585	287.368	370.654	314.709	254.236	307.947	421.209	226.092	251.753	203.99	108.75	271.283	262.352	299.627	264.949	272.063	342.174	213.561	286.168	204.454	113.34	244.431	291.263	280.923	234.135	239.901	256.021	225.998	171.205	212.06	153.161	195.176	263.212	241.639	228.058	143.306	219.756	348.57	222.162	72.8616	218.06	247.36	158.727
831	318.652	216.26	249.595	235.033	312.657	272.609	199.392	286.836	371.963	315.67	251.568	309.176	426.464	228.99	249.1	204.499	108.811	272.691	263.746	300.076	267.615	273.845	345.828	211.364	286.716	203.362	113.257	244.535	288.921	281.301	234.472	240.336	253.547	224.324	170.799	210.454	153.036	194.748	263.474	240.805	227.385	143.146	220.485	349.342	222.136	73.19	217.431	246.198	159.979
832	318.656	215.728	246.876	233.539	311.128	273.137	198.69	286.364	373.058	315.561	252.098	310.57	430.653	232.032	244.309	203.943	108.911	274.158	264.606	300.134	269.213	275.656	348.949	209.555	285.127	201.205	113.131	244.638	285.832	281.715	234.769	241.307	250.961	222.674	170.512	208.868	153.172	194.641	264.05	240.101	226.711	142.963	221.091	349.909	222.146	73.4775	216.88	245.161	161.387
833	320.26	216.265	246.825	232.579	310.454	275.266	198.479	285.947	374.473	314.919	253.165	312.041	434.841	235.075	241.122	202.851	109.029	275.329	266.213	300.299	270.28	277.516	354.204	207.843	282.473	205.45	112.916	244.8	282.849	282.378	235.189	239.074	248.178	221.06	170.304	207.327	153.577	194.711	264.5	239.396	225.968	142.78	221.526	350.805	222.222	73.929	216.362	244.657	162.796
834	318.665	216.267	247.839	231.406	309.992	273.125	198.781	285.544	375.567	316.412	254.228	313.639	437.426	237.972	241.667	200.696	109.116	276.202	267.287	300.357	271.345	279.366	352.522	206.228	279.819	205.428	112.589	245.259	279.334	283.361	235.691	237.91	245.143	219.489	170.125	205.844	154.217	194.746	265.076	238.802	225.341	142.569	221.782	351.495	222.365	74.2985	215.888	244.688	164.425
835	318.135	216.803	247.787	230.019	310.279	273.652	199.275	285.179	376.556	317.904	253.693	315.44	440.013	241.403	239.548	202.805	109.103	276.78	267.507	300.416	271.878	281.255	354.575	205.244	272.895	206.472	112.192	245.54	276.778	284.273	236.234	238.345	241.995	217.982	169.932	204.428	155.041	195.315	265.778	238.373	224.737	142.37	221.842	351.939	222.498	74.4627	215.413	245.22	166.242
836	318.675	217.339	247.735	229.059	310.458	273.646	200.025	284.897	377.224	316.731	254.224	317.378	443.135	244.979	240.628	204.383	109.077	277.358	267.299	300.545	269.74	283.26	361.431	204.842	273.976	205.916	111.752	246.296	274.329	285.15	236.736	238.248	238.763	216.562	169.695	203.084	155.983	195.883	266.479	237.999	223.97	142.187	221.675	352.342	222.568	74.627	214.944	246.192	168.216
837	318.144	220.543	247.683	227.352	310.211	273.107	200.924	284.703	377.464	312.885	253.689	319.383	444.654	248.701	236.906	205.428	109.038	277.817	267.732	300.532	271.874	285.313	365.617	204.779	271.854	203.222	111.286	247.644	272.948	286.168	236.827	236.017	235.727	215.226	169.388	201.811	156.935	196.914	267.275	237.7	223.088	142.105	221.325	352.581	222.549	74.8323	214.443	247.447	170.378
838	318.684	220.014	248.166	225.538	309.429	270.432	202.015	284.588	378.132	316.515	255.822	321.582	444.574	252.423	236.92	204.87	108.93	278.217	267.632	300.483	271.338	287.367	369.808	204.765	272.937	204.8	110.902	249.468	270.712	287.33	237.041	237.521	232.467	213.953	168.997	200.604	157.81	197.803	268.039	237.547	222.345	142.063	220.838	352.656	222.445	75.0787	213.919	249.016	172.697
839	313.884	220.016	244.914	223.618	308.968	271.495	203.17	284.52	378.907	319.074	253.685	323.888	449.294	256.339	234.266	205.916	108.778	278.853	268.278	300.292	271.87	289.401	376.129	205.431	270.28	207.448	110.575	251.172	269.224	288.562	237.42	240.624	229.235	212.738	168.526	199.47	158.539	198.976	268.772	237.431	221.718	142.06	220.18	352.935	222.257	75.3661	213.375	250.898	175.205
840	313.889	220.55	244.862	222.871	307.973	269.885	204.517	284.553	378.934	321.101	255.818	326.282	451.879	260.45	238.014	204.291	108.683	278.838	269.885	300.244	271.869	291.348	379.248	206.193	268.162	206.89	110.291	252.994	267.415	289.83	237.922	236.791	226.228	211.56	167.984	198.418	159.062	200.15	269.819	237.591	221.067	142.119	219.356	352.969	222.042	75.5304	212.861	253.095	177.838
841	313.893	221.621	243.742	221.058	306.552	272.014	205.907	284.661	378.962	318.325	256.885	328.889	453.934	264.511	236.96	203.734	108.601	278.467	272.453	300.266	268.663	293.179	384.505	207.004	267.106	207.934	110.058	254.936	265.606	290.955	238.383	237.228	223.137	210.406	167.39	197.441	159.326	201.252	270.615	237.899	220.463	142.256	218.369	352.51	221.856	75.5715	212.353	255.48	180.346
842	312.296	222.69	244.224	220.205	306.091	273.077	207.49	284.815	378.456	315.015	257.415	331.641	454.386	268.233	236.441	204.778	108.543	277.385	274.914	300.253	264.392	295.01	389.226	208.349	262.318	205.776	109.862	257.056	264.225	291.867	239.008	234.996	220.073	209.296	166.769	196.528	159.349	202.425	271.536	238.39	219.836	142.461	217.208	351.887	221.723	75.6125	211.875	258.053	182.947
843	310.701	222.693	243.638	219.352	304.669	270.936	209.243	285.053	377.096	315.44	259.014	334.306	454.304	272.198	236.454	202.619	108.542	276.302	277.482	300.169	263.323	296.821	393.947	209.742	262.865	207.354	109.661	258.76	263.484	293.171	239.633	235.965	217.234	208.239	166.164	195.68	159.167	203.599	272.457	238.974	219.255	142.744	215.824	351.017	221.66	75.8588	211.417	260.752	185.424
844	311.24	221.627	243.053	218.712	303.888	274.132	211.316	285.425	375.309	316.933	260.08	336.903	451.018	276.405	238.069	202.064	108.617	274.982	279.73	299.871	262.787	298.622	400.804	211.329	262.88	208.399	109.459	261.057	262.423	294.403	240.34	235.867	214.536	207.232	165.624	194.894	158.826	204.594	273.536	239.723	218.86	143.09	214.227	350.106	221.635	76.0639	210.974	263.545	187.994
845	310.711	221.63	242.467	217.859	302.893	273.591	213.624	285.863	374.269	314.691	261.68	339.354	451.471	280.903	239.151	200.441	108.659	273.307	281.017	299.716	264.386	300.453	402.324	213.45	258.089	206.24	109.294	263.355	261.255	295.564	240.883	235.77	212.034	206.272	165.183	194.178	158.376	205.625	274.708	240.509	218.534	143.458	212.412	348.99	221.601	76.3102	210.545	266.055	190.345
846	309.113	220.033	241.35	217.753	302.218	275.721	216.295	286.407	373.443	316.185	261.144	341.583	450.322	284.965	237.564	200.417	108.721	271.156	280.809	299.596	261.182	302.225	408.112	215.62	257.035	206.216	109.118	265.355	261.261	296.69	241.426	234.071	209.813	205.349	164.868	193.54	157.866	206.443	276.069	241.387	218.209	143.786	210.397	347.71	221.582	76.1871	210.138	268.723	192.57
847	310.72	219.5	239.162	217.006	301.117	276.248	219.179	287.104	373.257	317.143	262.209	343.568	447.572	288.638	236.51	199.325	108.814	268.473	281.029	299.761	259.578	303.794	414.435	218.177	253.848	205.66	108.935	266.941	260.84	297.602	241.968	236.108	207.901	204.437	164.687	192.996	157.303	207.367	277.398	242.43	217.999	144.058	208.176	346.881	221.657	76.3514	209.76	271.264	194.669
848	309.123	220.037	242.312	216.153	300.869	279.444	222.341	287.889	373.818	318.101	262.742	345.36	444.822	291.827	236.523	196.633	108.964	265.314	281.249	299.606	259.043	305.256	420.223	220.686	255.461	207.238	108.808	268.408	260.633	298.3	242.347	239.746	206.186	203.534	164.625	192.536	156.685	208.398	279.01	243.603	217.906	144.28	205.794	346.135	221.784	76.3924	209.399	273.743	196.643
849	309.662	219.506	240.126	215.407	300.622	281.038	225.652	288.749	374.486	314.259	263.273	346.87	443.14	294.578	238.138	198.747	109.151	262.038	281.788	299.486	257.974	306.659	421.209	223.389	253.341	205.08	108.744	269.935	260.959	298.999	242.685	239.115	204.836	202.634	164.649	192.16	156.017	209.607	280.371	244.885	217.812	144.518	203.296	345.429	221.939	76.5156	209.052	276.316	198.711
850	305.397	218.439	240.608	214.127	300.374	281.567	229.156	289.641	375.26	314.151	264.873	348.041	438.787	297.33	239.754	200.325	109.37	258.88	282.862	299.509	254.236	307.947	426.464	226.092	251.753	203.99	108.75	271.283	262.352	299.627	243.104	239.552	203.795	201.745	164.712	191.861	155.316	210.638	281.825	246.444	217.672	144.763	200.759	344.231	222.112	76.4334	208.683	278.607	200.716
851	307.001	216.841	241.622	212.419	299.913	281.562	232.617	290.519	376.462	316.71	268.072	348.785	433.371	299.645	239.768	202.434	109.62	255.603	284.043	299.567	251.568	309.176	430.653	228.99	249.1	204.499	108.811	272.691	263.746	300.076	243.565	239.454	202.95	200.874	164.769	191.642	154.624	211.633	283.281	248.003	217.533	145.041	198.206	343.197	222.282	76.3924	208.291	280.458	202.596
852	307.54	219.512	244.242	210.82	298.918	282.088	236.27	291.309	376.596	312.333	271.807	349.043	429.019	301.669	238.713	205.08	109.94	251.792	284.796	299.803	252.098	310.57	434.841	232.032	244.309	203.943	108.911	274.158	264.606	300.134	243.697	239.357	202.415	200.025	164.787	191.5	153.993	212.202	284.641	249.709	217.486	145.313	195.657	341.958	222.392	76.1872	207.889	282.215	204.476
853	308.077	217.913	244.19	209.113	298.457	282.082	239.945	292.03	375.877	306.354	272.871	348.797	425.2	303.547	241.397	203.457	110.296	248.278	285.549	299.932	253.165	312.041	437.426	235.075	241.122	202.851	109.029	275.329	266.213	300.299	243.911	237.657	202.104	199.188	164.738	191.442	153.465	213.019	285.971	251.581	217.554	145.613	193.12	340.555	222.411	75.8177	207.505	283.596	206.199
854	310.218	220.583	242.536	207.619	297.356	283.677	243.555	292.708	375.05	304.645	278.207	348.056	418.182	304.795	237.673	202.899	110.704	244.349	285.876	300.275	254.228	313.639	440.013	237.972	241.667	200.696	109.116	276.202	267.287	300.357	244.085	239.694	202.074	198.357	164.609	191.446	153.066	213.695	287.394	253.563	217.786	145.891	190.563	339.521	222.392	75.366	207.104	284.944	207.827
855	307.019	215.782	241.951	206.126	296.254	284.739	247.166	293.396	374.438	307.206	281.94	346.811	413.297	305.509	238.22	207.145	111.218	240.539	285.988	300.547	253.693	315.44	443.135	241.403	239.548	202.805	109.103	276.78	267.507	300.416	244.135	236.929	202.128	197.528	164.396	191.494	152.79	214.583	288.755	255.637	218.087	146.118	187.95	338.528	222.401	75.2429	206.722	286.011	209.33
856	309.695	216.319	237.629	204.953	295.794	284.198	251.011	294.07	373.291	307.632	286.742	345.07	404.675	305.398	238.233	203.387	111.813	236.135	285.995	300.783	254.224	317.378	444.654	244.979	240.628	204.383	109.077	277.358	267.299	300.545	244.349	237.366	202.436	196.695	164.1	191.56	152.607	215.543	290.147	257.711	218.388	146.256	185.311	337.987	222.426	74.9145	206.415	286.669	210.802
857	308.63	215.254	238.646	203.673	295.759	285.793	254.792	294.772	373.212	310.725	292.61	342.826	399.256	304.85	238.248	202.829	112.421	231.435	286.534	301.339	253.689	319.383	444.574	248.701	236.906	205.428	109.038	277.817	267.732	300.532	244.44	239.402	202.602	195.863	163.733	191.634	152.481	216.396	291.476	259.896	218.665	146.399	182.689	337.323	222.491	74.5862	206.173	287.013	212.336
858	305.434	215.79	238.06	203.14	294.978	286.32	258.573	295.474	373.666	309.017	292.076	340.173	392.239	303.817	238.262	203.341	113.079	226.854	286.647	301.896	255.822	321.582	449.294	252.423	236.92	204.87	108.93	278.217	267.632	300.483	244.614	239.304	203.022	195.041	163.315	191.696	152.378	217.356	292.555	262.08	218.897	146.52	180.123	336.946	222.63	74.2168	205.951	287.043	214.184
859	305.438	215.792	239.609	202.5	294.517	286.848	262.631	296.134	375.188	309.443	294.21	337.259	383.617	302.396	237.208	203.85	113.807	222.213	287.293	302.666	253.685	323.888	451.879	256.339	234.266	205.916	108.778	278.853	268.278	300.292	244.951	240.275	203.357	194.237	162.881	191.757	152.271	218.316	293.696	264.375	219.128	146.612	177.659	336.363	222.857	73.8472	205.758	286.791	215.813
860	306.509	213.659	240.091	202.928	293.843	286.842	266.882	296.664	375.642	308.801	297.409	334.112	377.664	300.781	237.222	202.76	114.603	218.343	287.299	303.435	255.818	326.282	453.934	260.45	238.014	204.291	108.683	278.838	269.885	300.244	245.248	239.109	204.029	193.442	162.469	191.809	152.144	218.991	294.648	266.67	219.267	146.699	175.362	335.371	223.102	73.4777	205.565	286.382	217.567
861	307.048	212.594	241.105	203.142	292.954	285.234	271.005	297.097	376.203	309.759	297.94	330.829	370.645	298.341	234.568	203.27	115.456	214.651	286.985	304.276	256.885	328.889	454.386	264.511	236.96	203.734	108.601	278.467	272.453	300.266	245.38	240.613	204.645	192.642	162.134	191.847	151.986	219.667	295.507	268.928	219.405	146.792	173.244	334.132	223.347	73.2724	205.304	285.785	219.164
862	305.986	211.531	238.919	203.677	291.319	287.364	275.042	297.432	376.337	310.719	301.673	327.546	365.226	295.611	235.115	202.179	116.403	210.959	286.351	305.117	257.415	331.641	454.304	268.233	236.441	204.778	108.543	277.385	274.914	300.253	245.307	238.382	205.121	191.826	161.909	191.855	151.793	220.377	295.957	271.15	219.474	146.833	171.292	332.933	223.499	72.985	204.951	284.999	220.73
863	304.39	213.133	239.936	203.571	289.044	286.29	278.909	297.67	376.471	310.076	304.342	324.224	359.808	292.395	235.663	200.555	117.375	207.505	286.678	306.1	259.014	334.306	451.018	272.198	236.454	202.619	108.542	276.302	277.482	300.169	245.316	236.149	205.456	190.982	161.811	191.83	151.577	221.017	296.125	273.371	219.589	146.864	169.559	332.269	223.57	72.8208	204.57	283.962	222.076
864	305.995	214.737	239.351	203.251	286.875	283.083	282.327	297.783	375.752	309.435	304.872	320.902	351.187	288.742	236.743	201.066	118.373	204.109	286.684	306.977	260.08	336.903	451.471	276.405	238.069	202.064	108.617	274.982	279.73	299.871	245.243	238.186	205.735	190.108	161.84	191.765	151.366	221.763	296.261	275.464	219.705	146.917	168.077	330.989	223.518	72.5745	204.18	282.642	223.359
865	305.466	209.403	238.232	203.038	284.92	285.743	285.404	297.835	375.673	310.928	309.14	317.677	347.371	284.701	236.756	199.442	119.395	201.366	287.116	307.711	261.68	339.354	450.322	280.903	239.151	200.441	108.659	273.307	281.017	299.716	245.376	238.622	205.79	189.21	161.986	191.668	151.209	222.261	296.209	277.501	219.866	147.021	166.843	329.503	223.346	72.4513	203.786	281.229	224.673
866	305.47	205.135	239.248	203.359	282.644	283.604	288.459	297.78	374.74	311.354	313.406	314.617	340.349	279.884	238.906	199.419	120.499	198.861	287.976	308.445	261.144	341.583	447.572	284.965	237.564	200.417	108.721	271.156	280.809	299.596	245.713	236.39	205.816	188.311	162.219	191.54	151.165	222.651	296.22	279.354	220.075	147.159	165.877	327.813	223.018	72.4102	203.44	279.595	225.894
867	305.476	206.738	238.662	203.467	280.582	283.597	291.429	297.577	374.66	311.246	315.006	311.761	331.731	274.97	235.719	199.93	121.679	196.473	288.516	308.859	262.209	343.568	444.822	288.638	236.51	199.325	108.814	268.473	281.029	299.761	246.01	235.224	205.898	187.423	162.491	191.388	151.278	223.149	296.482	281.097	220.167	147.33	165.203	325.958	222.633	72.4923	203.182	277.899	227.114
868	307.08	205.674	239.144	203.468	278.626	283.591	294.356	297.198	374.261	310.604	313.402	309.215	327.912	269.959	235.198	203.109	122.946	194.62	287.882	309.095	262.742	345.36	443.14	291.827	236.523	196.633	108.964	265.314	281.249	299.606	246.306	236.194	206.009	186.56	162.765	191.2	151.553	223.54	296.964	282.766	220.212	147.473	164.78	324.062	222.171	72.2459	202.981	276.234	228.241
869	307.619	205.677	239.092	203.682	276.457	283.053	297.176	296.647	372.794	309.963	306.464	306.961	323.027	264.9	234.145	204.153	124.257	192.826	287.354	309.26	263.273	346.87	438.787	294.578	238.138	198.747	109.151	262.038	281.788	299.486	246.644	235.564	205.979	185.725	162.989	190.976	151.958	223.966	297.571	284.38	220.142	147.571	164.553	321.92	221.674	72.287	202.812	274.475	229.053
870	304.955	208.346	239.575	203.149	273.862	281.978	299.677	295.873	371.754	308.255	315.534	304.939	318.142	259.889	234.692	203.595	125.562	191.15	286.4	309.318	264.873	348.041	433.371	297.33	239.754	200.325	109.37	258.88	282.862	299.509	247.064	236.533	205.921	184.911	163.121	190.713	152.41	224.214	298.367	285.976	220.072	147.59	164.514	319.859	221.172	72.2049	202.667	272.81	229.865
871	306.559	204.614	238.454	202.189	270.945	283.574	301.579	294.946	371.248	307.078	323.538	303.102	312.723	254.586	232.571	204.106	126.817	189.652	285.766	309.305	268.072	348.785	429.019	299.645	239.768	202.434	109.62	255.603	284.043	299.567	247.73	233.768	205.807	184.111	163.113	190.422	152.807	224.32	298.88	287.369	219.885	147.571	164.63	317.676	220.66	71.9997	202.478	271.113	230.269
872	306.033	203.548	241.071	201.549	268.029	285.701	302.927	293.893	370.635	305.903	324.071	301.488	309.44	249.429	233.651	204.617	128.097	188.925	285.238	309.15	271.807	349.043	425.2	301.669	238.713	205.08	109.94	251.792	284.796	299.803	247.986	235.805	205.805	183.324	162.949	190.114	153.055	224.497	299.425	288.671	219.815	147.523	164.919	315.287	220.089	72.1639	202.24	269.417	230.642
873	304.968	203.017	241.019	201.23	265.54	281.96	303.676	292.776	370.236	303.127	327.803	300.029	302.953	244.321	230.463	201.392	129.44	188.91	285.031	308.923	272.871	348.797	418.182	303.547	241.397	203.457	110.296	248.278	285.549	299.932	248.446	237.841	205.803	182.54	162.623	189.808	153.102	224.674	299.718	289.769	219.745	147.441	165.385	312.94	219.469	72.2871	201.982	267.721	230.827
874	305.508	200.35	238.833	200.59	262.304	284.623	304.085	291.626	370.797	304.62	327.268	298.744	298.068	239.262	229.409	200.3	130.864	189.428	285.251	308.341	278.207	348.056	413.297	304.795	237.673	202.899	110.704	244.349	285.876	300.275	249.4	238.278	205.829	181.741	162.142	189.512	152.924	224.851	299.886	290.758	219.674	147.326	166.063	310.346	218.791	72.3281	201.691	266.056	230.572
875	307.112	199.286	240.381	199.844	259.815	284.617	304.237	290.509	371.572	306.113	327.265	297.635	294.252	234.687	225.153	199.211	132.407	190.48	285.471	307.546	281.94	346.811	404.675	305.509	238.22	207.145	111.218	240.539	285.988	300.547	250.6	235.513	205.687	180.935	161.53	189.224	152.543	225.349	300.305	291.672	219.488	147.216	166.917	307.711	218.064	72.2049	201.381	264.548	229.846
876	308.718	197.153	236.595	199.418	256.579	283.542	304.239	289.41	372.774	303.336	324.597	296.738	292.567	230.646	225.702	201.854	134.102	192.066	285.263	306.358	286.742	345.07	399.256	305.398	238.233	203.387	111.813	236.135	285.995	300.783	251.84	235.948	205.91	180.111	160.838	188.943	152.001	225.989	300.536	292.477	219.209	147.039	167.946	304.542	217.32	72.2049	201.085	262.883	228.963
877	310.324	196.622	234.942	198.672	253.556	280.334	304.092	288.302	373.121	304.296	322.459	295.978	290.353	226.897	225.181	201.831	135.897	193.83	285.376	304.816	292.61	342.826	392.239	304.85	238.248	202.829	112.421	231.435	286.534	301.339	253.245	234.249	206.105	179.256	160.116	188.668	151.369	226.664	300.923	293.152	218.767	146.783	169.115	301.456	216.633	72.3691	200.795	261.25	227.735
878	308.728	193.422	234.357	197.605	250.747	280.328	303.753	287.175	373.469	300.451	324.059	295.373	290.271	223.535	226.263	201.276	137.792	196.008	285.168	303.166	292.076	340.173	383.617	303.817	238.262	203.341	113.079	226.854	286.647	301.896	254.445	234.151	206.384	178.376	159.42	188.395	150.695	227.304	301.468	293.809	218.233	146.51	170.421	298.41	215.974	72.4101	200.49	259.804	226.13
879	311.401	191.824	234.306	197.179	248.685	279.255	303.073	286.077	373.923	301.41	322.989	294.836	286.987	220.416	223.607	200.718	139.812	198.78	284.427	301.659	294.21	337.259	377.664	302.396	237.208	203.85	113.807	222.213	287.293	302.666	255.481	236.189	206.607	177.504	158.801	188.114	150.046	227.801	302.169	294.264	217.583	146.22	171.834	295.242	215.331	72.5743	200.185	258.296	224.054
880	310.337	194.495	234.787	197.927	246.089	278.715	301.965	284.945	373.844	302.371	324.589	294.425	285.305	217.637	223.621	202.296	142.009	202.619	283.686	299.974	297.409	334.112	370.645	300.781	237.222	202.76	114.603	218.343	287.299	303.435	256.599	232.89	206.773	176.649	158.306	187.818	149.471	228.725	303.059	294.774	216.886	145.863	173.392	292.155	214.739	72.8618	199.869	256.851	221.852
881	308.207	189.16	234.735	197.928	244.881	278.708	300.388	283.805	373.445	303.33	323.518	294.14	284.154	215.294	221.501	203.34	144.369	206.636	283.265	298.146	297.94	330.829	365.226	298.341	234.568	203.27	115.456	214.651	286.985	304.276	257.839	230.657	206.884	175.825	157.965	187.493	149.002	229.721	303.917	295.045	216.143	145.535	175.061	289.151	214.249	73.2724	199.571	255.406	219.369
882	312.481	186.493	236.284	198.569	243.459	277.101	298.406	282.678	372.725	306.424	322.45	293.981	283.54	213.339	222.583	203.316	146.892	210.949	282.417	296.425	301.673	327.546	359.808	295.611	235.115	202.179	116.403	210.959	286.351	305.117	258.793	228.425	207.023	175.054	157.784	187.114	148.644	230.859	304.682	295.094	215.469	145.217	176.79	285.572	213.814	73.3134	199.282	254.149	216.539
883	314.087	188.097	236.232	199.53	242.251	277.628	296.231	281.626	371.365	307.916	321.379	293.891	283.99	211.53	223.13	202.227	149.547	215.322	281.249	294.562	304.342	324.224	351.187	292.395	235.663	200.555	117.375	207.505	286.678	306.1	259.664	231.531	207.33	174.343	157.764	186.666	148.407	231.997	305.132	295.089	214.911	144.854	178.553	281.993	213.491	73.4776	199.014	252.924	213.522
884	316.227	187.566	236.181	199.958	240.829	275.489	293.8	280.611	369.258	305.142	317.643	293.81	283.909	209.722	224.21	201.669	152.377	220.051	279.975	292.557	304.872	320.902	347.371	288.742	236.743	201.066	118.373	204.109	286.684	306.977	260.084	229.298	207.946	173.69	157.896	186.106	148.282	233.312	305.394	294.955	214.238	144.407	180.321	278.783	213.269	73.9703	198.764	251.573	210.253
885	317.833	187.568	235.596	199.425	240.047	277.082	291.326	279.693	366.083	307.7	314.971	293.7	285.962	208.398	225.29	201.113	155.359	225.491	279.661	290.729	309.14	317.677	340.349	284.701	236.756	199.442	119.395	201.366	287.116	307.711	260.586	230.267	208.759	173.097	158.153	185.395	148.272	234.486	305.091	294.857	213.564	143.916	182.045	275.738	213.11	74.2166	198.546	250.065	206.984
886	317.837	185.97	234.476	199.533	239.16	279.212	288.874	278.877	363.442	309.728	311.768	293.541	285.346	207.074	224.772	203.224	158.51	231.168	278.599	288.76	313.406	314.617	331.731	279.884	238.906	199.419	120.499	198.861	287.976	308.445	260.882	230.704	209.487	172.569	158.49	184.525	148.383	235.801	304.568	294.705	212.728	143.379	183.74	272.528	212.963	74.4219	198.312	248.431	203.84
887	321.044	185.437	234.958	199.747	238.912	277.605	286.336	278.214	361.441	309.085	311.767	293.266	285.8	205.944	224.252	201.066	161.905	237.083	277.645	286.683	315.006	311.761	327.912	274.97	235.719	199.93	121.679	196.473	288.516	308.859	260.399	232.207	210.188	172.105	158.86	183.501	148.624	237.259	303.857	294.534	211.869	142.775	185.426	269.852	212.82	74.5041	198.073	246.484	200.572
888	322.115	183.84	234.372	199.641	238.985	274.93	283.542	277.672	359.228	311.113	309.629	292.894	286.785	205.348	222.665	201.044	165.622	243.294	276.69	284.749	313.402	309.215	323.027	269.959	235.198	203.109	122.946	194.62	287.882	309.095	259.505	231.577	211.225	171.699	159.208	182.336	148.987	238.717	303.083	294.271	210.917	142.137	187.01	267.217	212.632	74.6273	197.856	244.223	197.523
889	322.654	182.24	231.653	199.428	239.912	271.19	280.62	277.284	358.401	308.87	305.359	292.473	286.702	204.752	222.679	202.622	169.576	248.912	275.736	282.779	306.464	306.961	318.142	264.9	234.145	204.153	124.257	192.826	287.354	309.26	258.365	230.412	212.403	171.34	159.478	181.083	149.452	240.247	302.246	293.952	209.849	141.522	188.478	264.91	212.405	74.7094	197.698	241.773	194.379
890	325.86	183.31	231.067	199.749	240.305	274.385	277.314	277.057	358.108	309.829	304.822	292.052	288.757	204.399	225.893	206.334	173.738	254.826	274.568	280.773	315.534	304.939	312.723	259.889	234.692	203.595	125.562	191.15	286.4	309.318	256.937	231.916	213.497	171.014	159.614	179.798	149.986	241.847	301.378	293.708	208.781	140.912	189.81	263.096	212.156	74.7094	197.578	239.26	191.299
891	324.798	180.111	230.484	199.963	241.338	273.845	273.516	277.04	357.495	309.722	302.686	291.554	292.411	204.627	231.244	206.845	178.113	261.037	274.04	279.053	323.538	303.102	309.44	254.586	232.571	204.106	126.817	189.652	285.766	309.305	255.468	231.818	214.675	170.724	159.592	178.516	150.552	243.269	300.416	293.353	207.852	140.246	190.993	261.118	211.94	74.7916	197.504	236.465	188.47
892	327.471	178.512	232.032	199.857	242.264	274.372	269.42	277.203	356.776	311.216	301.082	291.026	296.065	204.953	232.859	205.754	182.595	267.248	273.406	277.474	324.071	301.488	302.953	249.429	233.651	204.617	128.097	188.925	285.238	309.15	253.712	232.254	215.825	170.469	159.403	177.259	151.111	244.621	299.547	292.869	206.9	139.558	191.991	259.879	211.745	74.9557	197.491	233.325	185.892
893	326.941	176.38	233.047	199.752	242.977	275.434	265.004	277.548	356.803	312.707	300.013	290.499	296.516	205.23	231.806	201.995	187.115	273.341	273.519	275.824	327.803	300.029	298.068	244.321	230.463	201.392	129.44	188.91	285.031	308.923	251.956	233.222	217.339	170.262	159.05	176.087	151.629	246.043	298.711	292.385	205.832	138.847	192.9	258.968	211.591	75.0789	197.492	230.122	183.659
894	329.616	174.781	232.461	200.393	243.904	276.493	260.438	278.027	355.764	316.869	297.344	290.01	297.502	205.847	233.953	200.904	191.679	278.84	273.632	274.139	327.268	298.744	294.252	239.262	229.409	200.3	130.864	189.428	285.251	308.341	249.953	232.59	218.798	170.11	158.566	175.038	152.07	247.572	297.654	291.938	204.694	138.035	193.707	258.427	211.475	75.284	197.422	226.51	181.645
895	330.154	174.25	232.944	200.607	245.257	278.089	255.915	278.608	354.297	316.226	295.741	289.57	300.623	207.046	237.703	204.084	196.286	283.984	273.531	272.739	327.265	297.635	292.567	234.687	225.153	199.211	132.407	190.48	285.471	307.546	247.869	234.63	220.285	170.017	157.995	174.158	152.381	248.995	296.472	291.73	203.626	137.144	194.407	258.666	211.407	75.6125	197.298	222.522	179.915
896	329.091	175.854	233.959	200.395	246.397	279.684	251.52	279.24	352.617	318.254	289.867	289.237	302.142	208.245	240.92	208.863	200.875	289.009	273.538	271.48	324.597	296.738	290.353	230.646	225.702	201.854	134.102	192.066	285.263	306.358	245.743	238.269	221.828	169.98	157.388	173.48	152.504	250.417	295.353	291.412	202.744	136.231	194.979	258.946	211.325	76.0641	197.125	218.472	178.404
897	330.696	174.787	232.84	200.182	247.324	281.28	247.082	279.891	350.723	320.815	278.659	289.01	304.729	209.881	240.933	212.042	205.426	294.034	273.757	270.115	322.459	295.978	290.271	226.897	225.181	201.831	135.897	193.83	285.376	304.816	243.618	237.637	223.231	169.983	156.787	173.013	152.386	251.839	294.17	290.909	201.954	135.245	195.418	259.39	211.263	76.3514	196.881	214.484	177.239
898	332.836	171.587	230.653	200.076	248.144	286.077	242.921	280.565	348.615	324.44	285.061	288.91	312.119	211.323	243.616	207.217	209.895	298.644	274.51	268.893	324.059	295.373	286.987	223.535	226.263	201.276	137.792	196.008	285.168	303.166	241.451	236.472	224.746	170.001	156.236	172.713	151.992	253.12	292.8	290.37	201.327	134.135	195.687	260.696	211.209	76.5156	196.547	210.558	176.387
899	333.375	169.99	231.135	199.543	248.963	285.002	238.74	281.276	346.402	325.934	287.727	289.004	312.571	212.813	246.297	207.194	214.264	302.957	275.904	267.848	322.989	294.836	285.305	220.416	223.607	200.718	139.812	198.78	284.427	301.659	239.038	236.374	226.71	170.021	155.772	172.533	151.309	254.4	291.335	289.721	200.63	132.958	195.768	262.659	211.152	76.7209	196.185	206.288	175.692
900	336.046	169.992	228.416	199.117	249.997	284.465	234.452	282.033	344.935	329.563	288.26	289.165	318.894	214.74	245.777	202.366	218.501	307.093	276.977	266.518	324.589	294.425	284.154	217.637	223.621	202.296	142.009	202.619	283.686	299.974	237.118	233.607	229.012	170.035	155.418	172.42	150.372	255.68	289.933	289.108	200.003	131.635	195.678	264.991	211.071	77.0492	195.82	202.174	175.249
901	335.517	169.995	228.899	199.011	250.923	284.99	230.462	282.796	343.361	330.523	289.324	289.327	324.682	216.861	247.392	203.41	222.531	311.11	277.837	265.296	323.518	294.14	283.54	215.294	221.501	203.34	144.369	206.636	283.265	298.146	235.526	235.11	231.257	170.028	155.186	172.33	149.242	257.031	288.437	288.422	199.538	130.16	195.46	267.694	210.917	77.4187	195.436	198.029	175.088
902	336.59	167.329	229.381	198.585	252.383	285.518	227.049	283.53	341.68	334.684	286.654	289.518	328.871	218.4	251.142	205.522	226.335	315.424	278.377	264.18	322.45	293.981	283.99	213.339	222.583	203.316	146.892	210.949	282.417	296.425	234.099	234.481	233.727	169.994	155.074	172.238	147.994	258.382	287.192	287.772	199.12	128.584	195.11	270.97	210.633	77.5829	195.052	194.01	174.865
903	335.527	167.331	227.728	198.479	253.95	287.647	223.999	284.269	340.427	335.109	283.45	289.611	333.058	219.793	251.155	204.966	229.825	319.5	278.49	263.135	321.379	293.891	283.909	211.53	223.13	202.227	149.547	215.322	281.249	294.562	232.876	233.315	235.972	169.922	155.083	172.13	146.701	259.485	286.167	287.141	198.794	126.991	194.614	274.329	210.291	77.7061	194.712	190.053	174.673
904	338.201	167.866	227.142	198.053	254.556	289.777	221.589	284.962	338.64	339.27	280.779	289.569	337.779	221.283	251.703	208.143	232.901	323.458	278.282	262.482	317.643	293.81	285.962	209.722	224.21	201.669	152.377	220.051	279.975	292.557	231.695	234.286	237.824	169.803	155.187	171.965	145.448	260.373	285.048	286.436	198.561	125.376	194.037	278.632	209.906	77.8293	194.401	186.473	174.637
905	340.34	168.936	227.09	197.52	255.59	291.904	220.268	285.603	337.6	338.629	279.177	289.488	342.502	222.773	251.183	209.721	235.512	327.06	278.822	261.899	314.971	293.7	285.346	208.398	225.29	201.113	155.359	225.491	279.661	290.729	230.636	234.188	239.985	169.622	155.355	171.704	144.284	261.084	284.243	285.787	198.329	123.755	193.35	282.976	209.482	77.9115	194.132	183.113	174.633
906	339.276	168.939	226.504	196.667	256.73	293.499	219.609	286.236	336.134	339.053	280.244	289.466	349.359	224.021	249.062	207.565	237.62	330.247	279.896	261.566	311.768	293.541	285.8	207.074	224.772	203.224	158.51	231.168	278.599	288.76	229.578	234.623	242.315	169.373	155.548	171.332	143.246	261.617	283.594	285.229	198.305	122.162	192.56	287.238	209.092	78.1166	193.899	180.035	174.661
907	339.281	165.207	228.055	195.707	257.443	294.027	219.462	286.882	335.094	339.48	273.836	289.394	357.814	225.56	251.211	210.21	239.195	333.433	281.609	261.268	311.767	293.266	286.785	205.944	224.252	201.066	161.905	237.083	277.645	286.683	228.849	232.924	244.364	169.064	155.724	170.852	142.343	261.972	283.072	284.506	198.142	120.609	191.74	291.336	208.792	78.0757	193.667	177.272	174.751
908	338.219	164.141	228.536	195.067	258.583	292.419	219.998	287.495	333.733	338.305	269.031	289.303	363.069	226.807	249.089	211.788	240.256	336.087	284.07	260.829	309.629	292.894	286.702	205.348	222.665	201.044	165.622	243.294	276.69	284.749	228.406	232.827	246.553	168.714	155.843	170.267	141.577	262.149	282.517	283.709	198.118	119.055	190.903	295.639	208.554	77.8705	193.427	174.759	174.967
909	340.89	163.076	231.685	194.642	260.043	294.549	221.261	288.072	333.441	337.128	268.495	289.106	368.325	227.715	250.172	209.629	240.832	338.028	286.532	260.424	305.359	292.473	288.757	204.752	222.679	202.622	169.576	248.912	275.736	282.779	227.922	231.663	248.854	168.338	155.862	169.614	140.925	262.148	281.932	282.858	198.303	117.502	190.019	300.229	208.377	77.542	193.196	172.372	175.057
910	340.363	162.544	233.235	194.322	261.504	294.543	222.8	288.584	332.508	335.955	265.293	288.763	373.046	228.623	251.785	209.072	240.881	339.673	288.353	259.913	304.822	292.052	292.411	204.399	225.893	206.334	173.738	254.826	274.568	280.773	227.685	231.565	251.099	167.948	155.753	168.929	140.383	261.899	281.566	282.006	198.511	116.01	189.143	304.656	208.245	77.1725	192.973	170.393	174.896
911	339.833	162.547	232.116	194.536	262.537	291.867	224.724	289.002	332.001	332.109	260.485	288.323	378.836	229.288	250.734	211.183	240.422	340.666	290.6	259.544	302.686	291.554	296.065	204.627	231.244	206.845	178.113	261.037	274.04	279.053	227.448	232.001	253.261	167.558	155.506	168.216	139.963	261.577	281.482	281.209	198.765	114.597	188.242	308.589	208.151	76.9262	192.779	168.948	174.736
912	340.372	159.346	235.267	194.537	263.357	292.395	227.075	289.333	331.068	327.733	256.215	287.844	384.091	229.662	247.543	209.027	239.435	341.54	292.741	259.282	301.082	291.026	296.516	204.953	232.859	205.754	182.595	267.248	273.406	277.474	227.375	232.437	255.253	167.166	155.118	167.474	139.693	261.292	281.524	280.467	199.043	113.251	187.277	312.194	208.089	76.68	192.622	167.754	174.606
913	342.51	159.882	234.149	194.111	264.284	288.119	229.831	289.552	330.776	325.49	252.478	287.355	389.879	230.231	253.428	209.536	237.934	341.94	294.135	259.02	300.013	290.499	297.502	205.23	231.806	201.995	187.115	273.341	273.519	275.824	227.343	231.272	257.33	166.777	154.61	166.707	139.608	260.864	281.567	279.763	199.367	112.052	186.308	315.512	208.047	76.598	192.474	166.717	174.508
914	344.117	159.885	234.097	193.898	265.317	282.244	232.801	289.642	329.736	322.18	249.807	286.954	392.467	230.459	255.042	209.513	235.886	342.28	295.422	258.829	297.344	290.01	300.623	205.847	233.953	200.904	191.679	278.84	273.632	274.139	227.229	230.64	259.21	166.398	154.021	165.925	139.726	260.259	281.672	279.04	199.576	111.049	185.347	318.501	208.001	76.4339	192.305	165.806	174.285
915	344.655	158.82	235.113	192.938	265.496	281.703	236.134	289.568	328.376	319.403	250.339	286.592	395.053	230.543	253.99	209.489	233.361	342.324	296.922	258.745	295.741	289.57	302.142	207.046	237.703	204.084	196.286	283.984	273.531	272.739	227.197	228.944	261.118	166.031	153.401	165.134	140.026	259.653	281.808	278.317	199.853	110.22	184.424	321.203	207.953	76.1465	192.101	165.083	174.061
916	342.525	156.688	233.459	191.658	265.462	278.495	239.829	289.328	327.443	314.493	249.804	286.142	397.642	230.286	249.2	206.799	230.415	342.249	298.316	258.768	289.867	289.237	304.729	208.245	240.92	208.863	200.875	289.009	273.538	271.48	227.247	227.779	263.111	165.688	152.796	164.34	140.444	258.621	281.945	277.612	200.131	109.593	183.574	323.494	207.918	75.9001	191.892	164.548	173.994
917	346.266	160.96	232.34	190.591	266.389	276.353	243.845	288.949	326.937	311.715	245.531	285.615	399.16	230.03	248.146	208.911	227.068	342.293	299.389	258.755	278.659	289.01	312.119	209.881	240.933	212.042	205.426	294.034	273.757	270.115	227.503	228.748	264.963	165.37	152.254	163.546	140.894	257.553	282.269	276.944	200.432	109.27	182.81	325.129	207.922	75.9001	191.661	164.076	173.896
918	348.404	157.226	239.76	188.884	266.675	273.146	248.011	288.458	325.47	306.271	241.26	285.126	399.611	229.725	245.492	212.622	223.381	341.863	300.142	258.67	285.061	288.91	312.571	211.323	243.616	207.217	209.895	298.644	274.51	268.893	227.758	227.049	266.506	165.067	151.807	162.753	141.28	256.449	282.751	276.239	200.64	109.2	182.062	326.764	207.958	75.941	191.458	163.918	173.673
919	346.275	159.362	239.175	186.964	267.388	270.472	252.326	287.893	324.323	302.961	241.259	284.638	400.064	229.371	243.904	212.598	219.456	341.314	300.896	258.266	287.727	289.004	318.894	212.813	246.297	207.194	214.264	302.957	275.904	267.848	227.809	228.02	267.628	164.772	151.479	161.957	141.536	255.452	283.421	275.387	200.686	109.444	181.387	328.316	208.041	75.6948	191.276	163.98	173.637
920	346.279	156.164	236.989	185.684	267.674	266.195	256.705	287.328	323.496	302.319	239.656	284.178	401.583	229.6	243.918	213.643	215.399	340.409	301.436	257.826	288.26	289.165	324.682	214.74	245.777	202.366	218.501	307.093	276.977	266.518	227.695	230.055	268.918	164.491	151.274	161.17	141.638	254.419	284.029	274.646	200.732	110.003	180.738	329.827	208.256	75.6537	191.07	164.607	173.539
921	346.285	152.431	235.336	184.724	268.173	263.52	261.105	286.726	322.563	303.277	220.975	283.845	400.434	229.344	243.931	212.02	211.229	338.971	301.549	257.031	289.324	289.327	328.871	216.861	247.392	203.41	222.531	311.11	277.837	265.296	227.581	229.426	270.012	164.215	151.191	160.413	141.606	253.494	284.73	273.978	200.754	110.865	180.098	331.133	208.603	75.5305	190.861	165.171	173.316
922	347.354	154.567	233.683	183.765	267.926	260.313	265.313	286.082	321.63	304.237	230.044	283.657	399.818	229.233	244.478	210.396	206.965	337.71	301.769	256.342	286.654	289.518	333.058	218.4	251.142	205.522	226.335	315.424	278.377	264.18	227.59	227.194	270.937	163.952	151.217	159.706	141.472	252.568	285.369	273.347	200.939	111.935	179.461	332.358	208.989	75.2841	190.685	166.049	173.123
923	348.962	155.104	234.164	183.765	267.572	257.638	269.201	285.405	320.377	303.595	238.583	283.489	402.404	229.267	243.958	210.906	202.675	336.212	301.775	256.044	283.45	289.611	337.779	219.793	251.155	204.966	229.825	319.5	278.49	263.135	227.394	229.763	271.974	163.717	151.339	159.062	141.298	251.678	286.164	272.734	201.147	113.246	178.863	333.212	209.368	74.9146	190.48	166.958	173.057
924	348.432	154.038	236.247	184.513	266.577	255.498	272.683	284.696	319.337	301.888	239.114	283.33	402.322	229.351	241.839	210.349	198.392	334.537	300.927	255.888	280.779	289.569	342.502	221.283	251.703	208.143	232.901	323.458	278.282	262.482	227.444	230.2	272.815	163.513	151.525	158.495	141.133	250.787	287.18	271.992	201.471	114.743	178.278	334.025	209.747	74.4218	190.252	167.993	172.927
925	348.438	152.441	231.392	184.087	265.369	252.29	275.568	283.946	317.87	300.178	238.046	283.21	397.972	229.774	242.387	211.393	194.072	332.446	300.506	255.804	279.177	289.488	349.359	222.773	251.183	209.721	235.512	327.06	278.822	261.899	227.412	226.9	273.375	163.329	151.739	158.004	141.011	249.719	288.541	271.306	201.958	116.431	177.736	335.003	210.064	74.1755	190.06	169.216	172.672
926	346.307	149.239	228.674	184.301	264.694	247.48	277.663	283.153	315.976	296.867	239.644	283.158	400.026	230.681	241.866	208.167	189.77	330.236	299.124	255.542	280.244	289.466	357.814	224.021	249.062	207.565	237.62	330.247	279.896	261.566	227.463	228.938	274.103	163.169	151.945	157.584	140.949	248.829	289.964	270.693	202.444	118.271	177.21	335.776	210.271	74.0112	189.844	170.848	172.731
927	346.846	152.446	228.622	185.583	263.806	248.008	279.053	282.337	314.083	295.157	238.042	283.145	394.608	231.832	240.279	210.28	185.6	328.205	296.462	255.209	273.836	289.394	363.069	225.56	251.211	210.21	239.195	333.433	281.609	261.268	227.431	230.974	274.579	163.032	152.091	157.232	140.957	247.797	291.168	270.117	203.001	120.273	176.736	336.384	210.399	73.8469	189.579	172.417	173.01
928	348.985	152.98	226.435	187.078	263.665	243.733	279.653	281.475	313.47	293.981	239.642	283.248	390.789	232.983	241.893	210.257	181.587	326.232	293.799	254.982	269.031	289.303	368.325	226.807	249.089	211.788	240.256	336.087	284.07	260.829	227.481	231.946	274.998	162.919	152.13	156.948	141.002	247.013	292.654	269.597	203.603	122.45	176.343	336.993	210.49	73.929	189.311	173.891	173.288
929	350.59	150.847	225.315	187.932	264.165	239.991	279.399	280.586	312.857	292.808	236.97	283.468	391.775	233.794	239.772	212.366	177.749	324.319	291.351	254.471	268.495	289.106	373.046	227.715	250.172	209.629	240.832	338.028	286.532	260.424	227.162	232.915	275.531	162.84	152.021	156.722	141.045	246.123	294.298	269.039	204.067	124.778	176.01	338.011	210.556	74.0933	189.076	175.523	173.63
930	350.596	150.85	223.13	189.748	265.518	237.848	278.377	279.691	312.565	295.366	239.104	283.862	390.091	234.459	239.785	212.343	174.163	322.584	288.048	254.067	265.293	288.763	378.836	228.623	251.785	209.072	240.881	339.673	288.353	259.913	226.637	232.283	276.034	162.805	151.726	156.549	141.044	245.233	295.941	268.647	204.6	127.264	175.74	338.989	210.572	73.8469	188.85	177.342	174.097
931	350.6	151.921	219.876	191.563	266.125	239.444	276.843	278.81	311.845	300.597	236.433	284.373	387.342	234.882	239.265	212.854	170.872	320.553	284.958	253.698	260.485	288.323	384.091	229.288	250.734	211.183	240.422	340.666	290.6	259.544	226.236	231.652	276.173	162.817	151.234	156.41	140.956	244.592	297.522	268.495	205.133	129.907	175.556	340.008	210.564	73.4365	188.659	179.256	174.595
932	351.138	152.457	218.222	193.166	266.838	239.439	274.732	277.92	311.979	300.489	232.16	284.894	386.193	235.596	239.278	212.297	167.845	318.581	282.509	253.365	256.215	287.844	389.879	229.662	247.543	209.027	239.435	341.54	292.741	259.282	225.958	235.824	276.199	162.87	150.546	156.286	140.761	243.737	299.353	268.324	205.619	132.707	175.419	341.068	210.551	73.2312	188.546	181.139	175.094
933	351.142	151.926	216.035	194.341	266.911	241.033	272.28	277.04	310.726	300.915	227.355	285.395	389.847	236.261	236.091	212.808	165.044	317.024	279.954	252.925	252.478	287.355	392.467	230.231	253.428	209.536	237.934	341.94	294.135	259.02	225.721	235.194	276.281	162.943	149.694	156.146	140.479	243.309	301.247	268.245	205.99	135.553	175.266	342.128	210.549	73.026	188.461	183.053	175.623
934	351.682	149.792	213.849	195.516	266.342	241.562	269.486	276.136	310.113	302.941	225.22	286.003	389.232	236.781	234.503	213.319	162.487	315.881	277.185	252.414	249.807	286.954	395.053	230.459	255.042	209.513	235.886	342.28	295.422	258.829	225.319	236.163	276.252	163.022	148.715	155.979	140.161	242.882	303.173	268.258	206.407	138.398	175.099	343.352	210.53	73.0671	188.37	184.935	176.122
935	352.752	149.795	211.129	197.971	266.095	243.69	266.478	275.19	309.713	299.097	222.549	286.63	390.751	237.058	234.518	210.094	160.157	314.324	274.416	251.903	250.339	286.592	397.642	230.543	253.99	209.489	233.361	342.324	296.922	258.745	225.123	235.532	276.109	163.085	147.664	155.771	139.865	242.383	305.099	268.363	206.986	141.232	174.911	344.822	210.499	73.3134	188.257	186.975	176.62
936	352.224	149.798	208.943	199.36	266.061	244.751	263.065	274.24	309.527	297.922	218.276	287.326	393.873	237.384	236.133	210.071	157.977	313.004	271.434	251.712	249.804	286.142	399.16	230.286	249.2	206.799	230.415	342.249	298.316	258.768	225.173	236.503	275.939	163.124	146.6	155.522	139.663	241.848	307.025	268.633	207.519	143.987	174.735	346.539	210.446	73.5188	188.104	188.794	177.055
937	351.695	150.333	206.756	199.681	266.667	246.345	259.438	273.322	308.38	297.815	218.274	288.186	391.121	237.419	235.613	213.25	155.923	311.744	268.665	251.272	245.531	285.615	399.611	230.03	248.146	208.911	227.068	342.293	299.389	258.755	225.183	236.937	275.937	163.142	145.582	155.226	139.614	241.207	309.014	268.941	207.959	146.669	174.607	348.214	210.347	73.8062	187.887	190.206	177.554
938	350.098	148.735	202.968	199.788	267.06	248.475	255.513	272.479	308.728	298.773	214.004	289.279	393.174	237.356	235.093	213.759	154.032	310.721	265.469	250.903	241.26	285.126	400.064	229.725	245.492	212.622	223.381	341.863	300.142	258.67	225.479	236.839	276.048	163.143	144.658	154.899	139.742	240.602	311.128	269.322	208.423	149.239	174.555	349.726	210.2	73.8062	187.642	191.806	178.021
939	348.502	148.737	197.581	200.109	267.88	250.602	251.502	271.724	308.862	295.463	211.867	290.411	392.559	237.439	232.971	214.804	152.342	309.935	262.059	250.357	241.259	284.638	401.583	229.371	243.904	212.598	219.456	341.314	300.896	258.266	225.817	237.81	275.877	163.126	143.876	154.545	140.029	239.889	313.305	269.905	208.979	151.77	174.568	351.648	209.99	73.642	187.394	193.375	178.551
940	352.774	149.272	199.13	199.042	267.525	252.731	247.3	271.056	308.889	295.889	210.799	291.592	395.681	237.62	231.918	214.246	150.784	309.563	258.863	249.525	239.656	284.178	400.434	229.6	243.918	213.643	215.399	340.409	301.436	257.826	226.401	237.178	275.482	163.113	143.264	154.173	140.438	239.497	315.576	270.507	209.558	154.222	174.585	353.487	209.734	73.6831	187.156	194.881	179.143
941	353.314	149.275	196.409	197.762	267.598	257.528	243.054	270.501	309.451	295.247	210.263	292.675	397.732	237.8	232.998	215.291	149.395	309.192	255.56	248.694	220.975	283.845	399.818	229.344	243.931	212.02	211.229	338.971	301.549	257.031	226.862	239.749	275.228	163.096	142.826	153.793	140.917	238.927	317.596	271.127	210.207	156.612	174.542	355.245	209.424	73.6831	186.928	196.418	179.767
942	350.651	149.277	192.622	196.909	267.991	261.793	238.851	270.001	311.079	297.807	210.261	293.788	399.787	238.368	233.547	215.269	148.195	308.525	252.043	248.04	230.044	283.657	402.404	229.233	244.478	210.396	206.965	337.71	301.769	256.342	227.487	241.786	274.917	163.067	142.56	153.429	141.388	238.535	319.679	271.858	211.042	158.862	174.435	356.88	209.106	73.7241	186.719	197.641	180.611
943	351.723	152.483	190.968	195.522	269.024	267.124	234.883	269.51	313.028	298.767	207.591	294.901	405.576	239.276	231.424	216.847	147.152	307.916	248.634	247.565	238.583	283.489	402.322	229.267	243.958	210.906	202.675	336.212	301.775	256.044	228.399	242.223	274.297	163.039	142.452	153.089	141.8	237.965	321.73	272.626	211.737	161.033	174.289	358.719	208.768	74.0115	186.513	198.676	181.298
944	352.261	149.282	192.518	193.495	270.164	271.385	231.15	269.061	314.55	298.659	209.19	296.003	406.561	240.087	230.906	216.289	146.19	307.604	245.438	247.161	239.114	283.33	397.972	229.351	241.839	210.349	198.392	334.537	300.927	255.888	229.27	242.66	273.818	163.019	142.474	152.796	142.137	237.537	323.876	273.522	212.456	163.058	174.114	360.354	208.434	74.2988	186.325	199.554	181.922
945	352.797	148.217	190.865	191.574	272.692	277.784	227.844	268.653	317.139	299.085	203.852	297.106	411.281	240.995	230.92	218.934	145.335	307.411	241.708	246.792	238.046	283.21	400.026	229.774	242.387	211.393	194.072	332.446	300.506	255.804	230.101	244.163	273.001	163.007	142.581	152.554	142.383	237.074	325.582	274.4	213.151	164.925	173.956	361.742	208.121	74.5452	186.133	200.463	182.577
946	354.938	148.22	196.684	189.654	275.967	280.981	225.135	268.237	320.049	299.51	202.248	298.374	415.47	241.854	229.865	221.045	144.631	307.455	238.406	246.245	239.644	283.158	394.608	230.681	241.866	208.167	189.77	330.236	299.124	255.542	231.054	245.667	272.016	163.009	142.744	152.371	142.532	236.646	327.006	275.149	213.963	166.658	173.879	362.925	207.85	74.7915	185.927	201.467	183.295
947	357.077	149.288	195.032	186.986	279.242	288.446	222.918	267.867	323.172	300.468	209.185	299.651	416.989	242.811	228.279	221.557	144.059	307.618	234.889	245.698	238.042	283.145	390.789	231.832	240.279	210.28	185.6	328.205	296.462	255.209	232.049	248.237	270.975	163.026	142.927	152.239	142.598	236.218	328.209	276.009	214.449	168.256	173.861	364.191	207.588	74.9558	185.684	202.439	183.793
948	358.684	148.224	194.98	184.746	283.157	293.776	221.169	267.571	324.907	299.829	214.517	300.919	418.509	243.719	227.225	220.465	143.6	307.958	232.547	245.436	239.642	283.248	391.775	232.983	241.893	210.257	181.587	326.232	293.799	254.982	232.633	247.607	269.681	163.034	143.095	152.15	142.573	235.577	329.068	276.942	214.774	169.714	173.878	365.168	207.329	75.2843	185.445	203.129	184.449
949	357.62	147.693	194.929	182.078	288.353	300.709	219.891	267.368	327.71	301.32	216.119	302.128	420.562	244.966	224.57	221.51	143.26	308.121	231.593	245.245	236.97	283.468	390.091	233.794	239.772	212.366	177.749	324.319	291.351	254.471	233.463	250.177	268.612	163.016	143.212	152.083	142.435	234.9	329.863	277.93	215.028	171.003	173.903	366.105	207.072	75.6126	185.209	203.85	185.136
950	357.092	148.228	192.207	178.984	293.656	306.573	219.061	267.257	329.872	303.881	218.249	303.348	420.48	245.875	224.583	225.755	143.039	308.165	231.599	245.197	239.104	283.862	387.342	234.459	239.785	212.343	174.163	322.584	288.048	254.067	234.17	248.48	267.093	162.948	143.257	152.02	142.169	234.259	330.628	278.955	215.167	172.124	173.912	366.836	206.808	76.1052	184.972	204.633	185.791
951	359.231	150.9	193.225	175.782	297.998	315.106	218.423	267.249	331.927	305.372	218.248	304.518	423.6	247.122	223.531	228.401	142.881	308.505	231.605	245.006	236.433	284.373	386.193	234.882	239.265	212.854	170.872	320.553	284.958	253.698	234.713	251.049	265.491	162.819	143.216	151.918	141.768	233.76	331.298	279.999	215.212	173.014	173.877	367.404	206.554	76.721	184.745	205.354	186.383
952	360.304	149.835	193.706	172.047	302.446	318.303	217.956	267.292	333.556	305.265	220.381	305.767	417.114	248.176	223.01	228.912	142.761	308.431	232.251	244.886	232.16	284.894	389.847	235.596	239.278	212.297	167.845	318.581	282.509	253.365	235.174	250.951	263.775	162.634	143.07	151.744	141.237	233.724	331.811	281.043	215.212	173.724	173.821	367.601	206.288	77.0495	184.533	205.856	187.07
953	357.105	147.702	195.254	168.526	306.789	327.368	217.681	267.377	335.932	310.495	223.582	306.995	415.431	249.278	218.22	229.957	142.703	308.475	232.364	244.589	227.355	285.395	389.232	236.261	236.091	212.808	165.044	317.024	279.954	252.925	235.675	250.854	262.004	162.409	142.812	151.483	140.604	233.439	332.324	282.068	215.234	174.244	173.74	367.963	206.028	77.2548	184.331	206.451	187.6
954	356.042	146.637	199.473	164.791	309.423	332.165	217.662	267.508	338.201	307.184	226.25	308.302	410.546	250.234	217.701	234.736	142.74	308.4	231.41	244.327	225.22	286.003	390.751	236.781	234.503	213.319	162.487	315.881	277.185	252.414	236.259	250.222	260.176	162.158	142.453	151.133	139.895	233.296	332.712	283.148	215.071	174.544	173.65	368.038	205.772	77.5011	184.149	207.141	188.444
955	358.182	145.038	198.355	161.589	311.524	339.097	218.028	267.718	340.897	309.212	231.05	309.715	409.931	251.336	214.512	235.78	142.846	308.385	230.882	244.136	222.549	286.63	393.873	237.058	234.518	210.094	160.157	314.324	274.416	251.903	236.925	250.66	258.545	161.884	142.011	150.69	139.163	233.081	332.942	284.302	214.861	174.581	173.552	368.112	205.522	77.7883	184.012	207.799	189.539
956	358.186	145.575	201.504	158.815	314.051	346.029	218.842	268.002	344.341	309.637	232.649	311.187	406.648	252.39	210.79	233.622	142.983	308.192	230.995	243.874	218.276	287.326	391.121	237.384	236.133	210.071	157.977	313.004	271.434	251.712	237.016	248.96	256.83	161.596	141.496	150.18	138.456	232.903	332.639	285.456	214.721	174.403	173.428	367.941	205.25	77.9935	183.927	208.394	190.602
957	356.59	146.645	202.519	157.215	317.006	350.293	220.082	268.421	347.997	308.461	234.248	312.678	400.161	253.783	208.67	233.067	143.202	307.346	231.642	243.754	218.274	288.186	393.174	237.419	235.613	213.25	155.923	311.744	268.665	251.272	237.231	249.397	255.087	161.299	140.945	149.626	137.797	232.475	332.085	286.757	214.512	174.035	173.248	367.564	204.977	78.4041	183.904	208.927	191.54
958	359.796	142.911	204.069	155.294	319.64	352.421	221.75	268.978	351.547	308.888	236.382	314.275	397.944	254.982	207.616	233.044	143.439	306.501	233.143	243.457	214.004	289.279	392.559	237.356	235.093	213.759	154.032	310.721	265.469	250.903	237.691	250.366	253.484	160.985	140.391	149.04	137.21	232.367	331.625	288.003	214.07	173.459	173.051	367.269	204.705	78.6914	183.929	209.271	192.761
959	357.133	146.649	205.618	154.014	322.702	354.017	223.845	269.652	354.563	307.711	239.582	315.95	391.46	256.472	203.893	234.62	143.664	305.359	234.643	243.088	211.867	290.411	395.681	237.439	232.971	214.804	152.342	309.935	262.059	250.357	238.07	251.337	251.6	160.657	139.863	148.442	136.73	232.367	330.757	289.268	213.606	172.698	172.859	367.179	204.428	78.9788	183.962	209.71	193.918
960	357.67	143.985	205.566	152.627	325.656	356.145	226.067	270.359	357.472	309.205	239.046	317.684	387.108	258.108	200.705	237.799	143.889	303.802	236.037	242.541	210.799	291.592	397.732	237.62	231.918	214.246	150.784	309.563	258.863	249.525	238.367	249.104	249.435	160.327	139.386	147.878	136.352	232.508	329.481	290.385	213.257	171.773	172.658	366.843	204.127	79.1428	183.969	210.148	194.856
961	355.007	143.986	204.98	151.561	328.824	360.409	228.525	271.098	360.168	310.165	242.245	319.495	383.29	260.035	200.185	242.046	144.121	302.007	237.751	242.065	210.263	292.675	399.787	237.8	232.998	215.291	149.395	309.192	255.56	248.694	238.909	252.744	247.579	159.992	138.993	147.391	136.075	232.65	327.733	291.502	212.815	170.68	172.465	366.425	203.798	79.1428	183.949	210.649	195.825
962	355.011	145.055	204.929	151.242	331.352	359.334	231.452	271.846	362.544	309.522	228.902	321.316	377.873	261.962	200.732	237.22	144.314	299.916	239.999	241.483	210.261	293.788	405.576	238.368	233.547	215.269	148.195	308.525	252.043	248.04	239.001	250.511	245.808	159.645	138.702	147.017	135.921	233.04	325.955	292.472	212.466	169.363	172.282	366.048	203.459	79.0198	183.904	211.151	196.826
963	353.95	143.991	205.412	151.562	332.812	358.796	234.806	272.585	365.24	310.482	238.506	323.137	374.054	264.471	199.144	237.731	144.47	297.648	241.819	240.545	207.591	294.901	406.561	239.276	231.424	216.847	147.152	307.916	248.634	247.565	239.133	252.549	244.065	159.283	138.525	146.782	135.895	233.645	324.05	293.331	212.025	167.854	172.068	365.712	203.126	78.8966	183.814	211.463	197.827
964	353.954	142.392	209.096	152.31	334.166	363.059	238.331	273.222	367.616	308.24	247.043	325.074	367.568	266.882	197.557	240.908	144.563	295.142	244.28	239.678	209.19	296.003	411.281	240.087	230.906	216.289	146.19	307.604	245.438	247.161	239.388	253.517	242.574	158.903	138.469	146.684	135.977	234.462	322.429	294.154	211.583	166.183	171.811	365.458	202.803	78.7323	183.731	211.714	199.11
965	350.756	141.861	212.247	153.592	335.412	359.316	242.155	273.84	369.245	309.199	250.777	327.109	362.684	269.683	195.971	239.284	144.6	292.28	247.061	238.811	203.852	297.106	415.47	240.995	230.92	218.934	145.335	307.411	241.708	246.792	239.439	258.223	241.392	158.503	138.546	146.69	136.165	235.529	321.027	294.885	211.072	164.382	171.529	365.328	202.545	78.7732	183.677	212.089	200.393
966	349.693	143.464	214.329	154.66	335.805	361.979	246.107	274.445	370.446	313.361	256.112	329.221	361.001	272.822	194.917	238.196	144.58	289.537	249.202	237.767	202.248	298.374	416.989	241.854	229.865	221.045	144.631	307.455	238.406	246.245	239.489	259.727	240.155	158.091	138.76	146.764	136.438	236.702	319.468	295.726	210.77	162.447	171.201	365.238	202.335	78.8143	183.646	212.339	201.645
967	347.562	145.601	214.277	155.514	335.664	359.304	249.91	275.007	371.754	314.853	259.845	331.391	353.447	276.302	193.865	234.97	144.523	286.734	251.129	237.078	209.185	299.651	418.509	242.811	228.279	221.557	144.059	307.618	234.889	245.698	239.416	264.966	239.114	157.676	139.104	146.88	136.736	237.769	317.846	296.438	210.305	160.393	170.842	365.272	202.181	78.7734	183.647	212.495	202.96
968	345.967	142.402	216.894	156.476	335.843	355.563	253.37	275.533	372.849	316.347	260.911	333.503	349.63	279.878	196.546	234.412	144.453	284.584	253.591	236.246	214.517	300.919	420.562	243.719	227.225	220.465	143.6	307.958	232.547	245.436	239.22	264.869	237.904	157.266	139.573	147.012	137.001	239.405	316.099	297.04	209.77	158.244	170.483	365.223	202.072	78.6913	183.655	212.62	204.211
969	344.904	140.801	218.443	158.612	335.702	353.422	256.575	276.104	374.157	315.705	260.375	335.44	343.678	283.6	194.959	235.456	144.376	282.375	256.692	235.593	216.119	302.128	420.48	244.966	224.57	221.51	143.26	308.121	231.593	245.245	239.311	267.439	237.34	156.865	140.158	147.144	137.19	241.076	314.478	297.568	209.074	156.028	170.115	365.215	202.02	78.6091	183.627	212.807	205.746
970	343.308	140.804	218.926	161.601	335.241	352.348	259.438	276.676	375.572	317.196	261.974	337.183	339.86	287.613	196.039	235.432	144.313	280.521	259.473	235.082	218.249	303.348	423.6	245.875	224.583	225.755	143.039	308.165	231.599	245.197	239.403	267.341	236.664	156.474	140.835	147.26	137.255	242.854	312.636	297.986	208.586	153.778	169.748	365.7	201.931	78.2808	183.575	213.057	207.28
971	344.379	140.806	221.541	165.124	334.46	350.208	262.216	277.253	376.561	312.286	263.041	338.693	334.975	291.529	194.987	234.877	144.23	278.786	263.001	234.535	218.248	304.518	417.114	247.122	223.531	228.401	142.881	308.505	231.605	245.006	239.576	269.379	236.269	156.097	141.568	147.331	137.177	244.882	310.638	298.146	208.167	151.522	169.385	365.939	201.879	77.9524	183.502	213.245	208.595
972	343.317	142.411	222.023	168.647	334.213	346.999	264.887	277.825	377.656	308.443	262.505	339.981	327.956	295.445	191.263	233.785	144.135	276.933	266.53	233.668	220.381	305.767	415.431	248.176	223.01	228.912	142.761	308.431	232.251	244.886	239.75	273.552	235.902	155.734	142.321	147.33	136.977	247.122	308.357	298.178	207.865	149.311	169.026	365.89	201.853	77.665	183.402	213.369	209.941
973	344.389	142.947	223.573	171.637	333.965	345.391	267.537	278.364	377.897	310.47	262.503	341.103	322.003	299.168	190.743	232.162	143.989	275.138	269.952	232.623	223.582	306.995	410.546	249.278	218.22	229.957	142.703	308.475	232.364	244.589	239.923	276.656	235.704	155.383	143.05	147.259	136.685	249.292	306.17	298.117	207.609	147.151	168.645	365.883	201.833	77.4188	183.295	213.556	211.444
974	342.258	142.949	225.122	174.199	332.971	338.45	270.251	278.866	377.818	313.563	263.568	342.041	320.854	302.695	190.757	232.673	143.806	273.344	274.228	231.685	226.25	308.302	409.931	250.234	217.701	234.736	142.74	308.4	231.41	244.327	240.26	279.759	235.393	155.054	143.715	147.127	136.332	251.426	303.952	297.891	207.399	145.092	168.286	365.793	201.793	77.1314	183.234	213.806	213.041
975	342.264	143.486	227.74	176.228	332.616	333.637	273.05	279.355	377.525	310.253	262.499	342.717	317.57	305.932	193.44	234.783	143.573	271.965	278.077	230.641	231.05	309.715	406.648	251.336	214.512	235.78	142.846	308.385	230.882	244.136	240.762	280.73	235.082	154.751	144.27	146.948	135.952	253.524	301.515	297.701	207.283	143.083	167.975	365.868	201.767	77.0493	183.226	214.025	214.418
976	341.199	142.42	229.823	178.577	332.582	332.031	275.401	279.787	377.339	310.68	259.828	343.111	313.219	308.732	195.055	233.693	143.327	271.001	281.392	229.524	232.649	311.187	400.161	252.39	210.79	233.622	142.983	308.192	230.995	243.874	241.428	283.302	234.996	154.468	144.704	146.756	135.548	255.516	299.234	297.402	207.12	141.119	167.71	366.188	201.753	76.8852	183.269	214.213	215.733
977	340.672	142.956	228.704	180.926	331.908	329.358	277.389	280.151	376.726	311.638	257.693	343.147	311.535	310.95	195.069	234.738	143.044	270.037	284.493	228.444	234.248	312.678	397.944	253.783	208.67	233.067	143.202	307.346	231.642	243.754	242.299	285.338	235.135	154.209	145.015	146.578	135.108	257.116	297.047	297.01	207.165	139.122	167.458	366.591	201.746	76.7622	183.392	214.431	217.267
978	340.676	143.493	230.787	184.129	331.446	329.351	278.928	280.421	376.22	313.131	256.089	342.862	309.321	312.441	194.016	234.714	142.741	269.072	287.274	227.399	236.382	314.275	391.46	254.982	207.616	233.044	143.439	306.501	233.143	243.457	243.458	290.577	235.442	153.984	145.217	146.411	134.629	258.503	295.143	296.397	207.257	137.069	167.227	366.953	201.799	76.7622	183.555	214.744	218.864
979	340.681	144.029	231.803	187.332	331.519	327.745	279.891	280.584	376.034	315.159	255.553	342.238	305.502	313.494	192.428	232.556	142.42	268.168	288.988	226.354	239.582	315.95	387.108	256.472	203.893	234.62	143.664	305.359	234.643	243.088	244.617	290.48	236.058	153.788	145.35	146.248	134.117	259.641	293.27	295.692	207.442	134.942	166.992	367.479	201.927	76.68	183.715	215.214	220.399
980	342.286	140.295	232.818	189.788	329.99	324.002	280.236	280.609	375.528	312.382	253.949	341.264	306.488	314.014	194.043	232.533	142.036	267.322	291.235	225.701	239.046	317.684	383.29	258.108	200.705	237.799	143.889	303.802	236.037	242.541	245.775	290.382	236.562	153.619	145.472	146.089	133.587	260.387	291.554	294.896	207.558	132.81	166.727	368.088	202.155	76.6389	183.829	215.527	221.714
981	339.622	141.365	234.9	192.244	328.462	324.531	280.452	280.498	375.021	316.542	252.882	339.922	303.204	313.418	195.657	233.577	141.564	266.654	293.589	225.154	242.245	319.495	377.873	260.035	200.185	242.046	144.121	302.007	237.751	242.065	247.18	292.42	237.515	153.474	145.652	145.939	133.086	261.098	289.713	294.136	207.627	130.689	166.423	368.408	202.434	76.8032	183.934	216.122	222.745
982	341.227	142.435	235.917	194.806	326.613	324.524	280.647	280.253	374.195	313.233	247.543	338.337	299.921	311.9	195.672	234.088	141.017	265.868	295.837	224.181	228.902	321.316	374.054	261.962	200.732	237.22	144.314	299.916	239.999	241.483	248.627	296.059	238.496	153.346	145.961	145.791	132.662	261.596	287.746	293.339	207.905	128.652	166.133	368.976	202.696	76.7212	184.041	216.875	223.778
983	342.833	144.039	233.731	197.475	324.765	323.984	281.076	279.958	373.795	310.455	236.867	336.451	301.974	310.236	196.218	237.267	140.445	265.497	298.619	223.171	238.506	323.137	367.568	264.471	199.144	237.731	144.47	297.648	241.819	240.545	250.237	298.63	239.478	153.219	146.47	145.648	132.344	261.382	285.496	292.487	208.113	126.745	165.894	369.05	202.934	76.5569	184.16	217.596	224.841
984	341.771	144.04	234.745	200.144	322.489	324.512	281.869	279.611	373.289	310.347	246.472	334.342	300.291	308.088	196.766	238.843	139.828	265.6	300.76	221.913	247.043	325.074	362.684	266.882	197.557	240.908	144.563	295.142	244.28	239.678	251.724	301.733	240.403	153.083	147.25	145.52	132.14	260.989	283.529	291.616	208.437	124.922	165.693	369.289	203.106	76.598	184.287	218.631	225.811
985	342.309	142.975	235.227	203.241	322.028	325.572	283.088	279.203	372.676	307.573	250.739	332.087	300.21	305.212	197.846	239.887	139.193	265.407	303.007	220.477	250.777	327.109	361.001	269.683	195.971	239.284	144.6	292.28	247.061	238.811	253.129	305.371	241.805	152.933	148.358	145.409	132.07	260.241	281.877	290.654	208.645	123.149	165.509	369.815	203.185	76.5569	184.455	219.76	226.937
986	342.315	142.978	239.978	205.696	321.46	327.168	284.564	278.75	371.743	305.863	250.203	329.736	302.795	301.656	197.328	238.263	138.577	265.392	305.361	219.148	256.112	329.221	353.447	272.822	194.917	238.196	144.58	289.537	249.202	237.767	254.74	309.01	243.461	152.774	149.84	145.305	132.13	259.067	280.129	289.581	208.853	121.433	165.342	370.341	203.221	76.5569	184.626	220.952	227.561
987	345.521	145.113	240.46	208.046	321.106	330.362	285.997	278.314	371.557	303.085	253.402	327.296	301.647	297.809	196.808	238.774	137.929	265.495	307.822	218.103	259.845	331.391	349.63	276.302	193.865	234.97	144.523	286.734	251.129	237.078	256.103	308.912	245.116	152.602	151.726	145.213	132.334	257.714	278.445	288.546	208.829	119.767	165.162	370.991	203.286	76.5569	184.732	222.332	228.185
988	348.728	146.183	242.544	209.327	320.111	334.093	287.237	277.819	370.944	298.709	250.734	324.809	301.566	293.671	198.955	243.555	137.213	265.479	309.963	217.236	260.911	333.503	343.678	279.878	196.546	234.412	144.453	284.584	253.591	236.246	257.55	314.153	246.631	152.423	154.038	145.137	132.698	256.041	276.729	287.381	208.713	118.084	164.923	371.312	203.334	76.639	184.822	223.524	228.526
989	353	147.787	243.027	210.503	319.757	336.755	288.307	277.282	369.904	296.999	248.596	322.263	304.686	289.533	198.435	242.464	136.458	265.168	310.93	216.761	260.375	335.44	339.86	283.6	194.959	235.456	144.376	282.375	256.692	235.593	258.708	311.387	248.568	152.236	156.769	145.079	133.236	254.297	275.453	286.179	208.434	116.418	164.658	371.427	203.44	76.68	184.91	224.716	228.899
990	358.344	147.256	244.043	211.358	318.656	341.019	289.292	276.717	369.398	297.959	251.264	319.737	305.671	284.91	200.584	245.109	135.722	265.212	311.149	216.499	261.974	337.183	334.975	287.613	196.039	235.432	144.313	280.521	259.473	235.082	259.662	315.024	250.869	152.042	159.902	145.039	133.91	252.375	274.302	284.977	208.131	114.786	164.415	371.132	203.594	76.6389	184.983	225.813	228.989
991	359.949	145.658	245.593	212.532	317.448	346.882	290.084	276.115	369.212	297.85	248.059	317.375	309.861	280.481	202.734	248.288	134.943	265.493	310.729	216.272	263.041	338.693	327.956	291.529	194.987	234.877	144.23	278.786	263.001	234.535	260.533	315.995	253.199	151.823	163.405	145.016	134.651	250.453	273.308	283.997	207.829	113.176	164.248	370.837	203.742	76.598	185.058	227.005	228.86
992	364.224	146.192	246.608	212.64	316.453	349.012	291.026	275.424	368.492	297.208	246.456	315.218	312.98	275.858	208.082	250.934	134.157	265.893	309.56	215.903	262.505	339.981	322.003	295.445	191.263	233.785	144.135	276.933	266.53	233.668	261.363	315.363	255.556	151.592	167.239	145.003	135.347	248.673	272.377	282.85	207.411	111.567	164.149	370.296	203.902	76.6802	185.194	228.103	228.637
993	366.361	147.263	249.223	214.028	316.206	353.808	292.096	274.674	368.52	293.899	246.454	313.303	316.099	271.381	207.03	248.775	133.371	265.937	307.432	215.713	262.503	341.103	320.854	299.168	190.743	232.162	143.989	275.138	269.952	232.623	262.193	317.401	257.886	151.35	171.354	144.991	135.875	246.858	271.321	281.685	206.923	110.013	164.115	369.55	204.11	76.7622	185.385	229.64	228.13
994	374.373	149.4	251.307	214.776	315.958	356.472	293.188	273.839	369.081	291.656	246.985	311.727	319.221	266.467	208.111	249.819	132.56	265.981	306.691	215.379	263.568	342.041	317.57	302.695	190.757	232.673	143.806	273.344	274.228	231.685	262.695	318.369	260.384	151.105	175.703	144.956	136.13	245.043	270.578	280.594	206.342	108.499	164.115	369.132	204.371	76.5159	185.608	231.02	227.436
995	375.978	149.936	248.053	215.096	316.138	358.067	294.044	272.945	368.575	292.616	245.383	310.414	321.807	261.698	208.658	251.396	131.668	265.728	306.484	214.512	262.499	342.717	313.219	305.932	193.44	234.783	143.573	271.965	278.077	230.641	263.526	320.941	262.938	150.872	180.235	144.883	136.066	243.405	269.898	279.374	205.599	107.035	164.102	368.549	204.689	76.557	185.859	232.244	226.616
996	382.92	148.872	245.334	214.457	316.744	361.262	294.837	271.999	368.389	293.575	243.246	309.265	321.192	257.269	209.74	251.374	130.725	265.594	305.85	213.646	259.828	343.111	311.535	308.732	195.055	233.693	143.327	271.001	281.392	229.524	264.274	326.18	265.24	150.664	184.893	144.766	135.704	241.768	269.469	278.32	204.855	105.662	164.042	367.967	205.067	76.9675	186.136	233.624	225.795
997	382.925	148.875	249.016	214.671	317.136	360.723	295.501	271.035	367.776	295.067	241.643	308.282	324.846	253.132	211.887	255.087	129.782	265.579	305.643	212.957	257.693	343.147	309.321	310.95	195.069	234.738	143.044	270.037	284.493	228.444	264.529	327.684	267.485	150.481	189.626	144.605	135.115	240.237	269.167	277.358	203.973	104.383	163.973	367.221	205.432	76.9265	186.408	235.161	224.881
998	390.935	149.409	247.363	214.245	316.568	363.918	295.994	270.043	366.736	293.893	237.372	307.444	328.499	249.188	212.435	254.53	128.883	266.097	305.542	212.339	256.089	342.862	305.502	312.441	194.016	234.714	142.741	269.072	287.274	227.399	264.867	328.654	269.983	150.339	194.383	144.393	134.409	239.24	268.801	276.395	203.09	103.217	163.896	366.31	205.762	77.0495	186.65	236.416	223.779
999	393.076	149.946	250.514	214.246	316.321	367.115	296.296	269.07	365.803	295.919	237.371	306.732	328.417	245.341	210.848	256.108	128.041	266.26	304.801	211.721	255.553	342.238	306.488	313.494	192.428	232.556	142.42	268.168	288.988	226.354	264.999	329.624	272.369	150.264	199.119	144.138	133.693	238.314	268.811	275.543	202.231	102.136	163.797	365.194	206.039	77.2958	186.913	237.576	222.55
1000	397.348	149.948	249.396	214.567	315.54	372.978	296.682	268.105	365.938	296.344	234.7	306.214	332.606	241.737	215.131	256.085	127.192	266.304	302.992	211.103	253.949	341.264	303.204	314.014	194.043	232.533	142.036	267.322	291.235	225.701	265.337	332.193	274.502	150.262	203.788	143.853	133.05	237.566	269.419	274.93	201.233	101.122	163.699	363.75	206.313	77.46	187.196	238.831	221.039
1001	401.624	151.552	248.277	215.635	314.865	371.372	297.261	267.174	365.752	295.704	234.164	305.833	334.127	238.521	216.213	258.731	126.356	265.992	301.397	210.699	252.882	339.922	299.921	313.418	195.657	233.577	141.564	266.654	293.589	225.154	265.469	332.097	276.691	150.344	208.347	143.547	132.525	237.032	270.058	274.428	200.165	100.113	163.605	362.387	206.575	77.6651	187.499	239.74	219.434
1002	403.761	153.689	251.962	217.024	313.444	372.432	297.647	266.284	366.313	297.73	233.093	305.49	336.712	235.16	216.227	259.242	125.507	265.502	299.268	210.294	247.543	338.337	301.974	311.9	195.672	234.088	141.017	265.868	295.837	224.181	265.807	335.203	278.796	150.52	212.749	143.22	132.121	236.426	270.665	274.018	199.027	99.1269	163.489	360.943	206.865	77.8293	187.833	240.555	217.672
1003	404.3	154.758	248.706	217.985	312.769	376.163	298.013	265.45	367.194	299.224	234.161	305.282	340.366	232.526	214.64	259.218	124.634	264.835	297.459	209.819	236.867	336.451	300.291	310.236	196.218	237.267	140.445	265.497	298.619	223.171	266.062	335.105	280.732	150.77	216.962	142.889	131.812	235.963	271.272	273.829	197.866	98.1464	163.365	359.745	207.216	77.7472	188.233	241.245	215.879
1004	409.108	154.761	249.189	218.52	312.201	377.226	298.421	264.638	367.115	300.182	229.888	305.094	342.42	230.571	213.052	261.328	123.741	264.167	295.758	208.916	246.472	334.342	300.21	308.088	196.766	238.843	139.828	265.6	300.76	221.913	266.318	335.007	282.05	151.074	220.95	142.566	131.554	235.535	272.193	273.731	196.937	97.2108	163.241	358.465	207.598	77.5829	188.654	241.778	213.866
1005	412.848	155.832	250.204	218.414	312.381	375.084	298.679	263.86	366.929	301.14	209.607	304.761	345.54	229.199	216.269	261.839	122.899	263.559	294.377	208.121	250.739	332.087	302.795	305.212	197.846	239.887	139.193	265.407	303.007	220.477	266.286	336.511	283.088	151.413	224.699	142.26	131.301	235.214	273.46	273.689	195.846	96.3033	163.147	357.02	207.916	77.5418	189.069	242.561	212.135
1006	412.854	154.232	252.286	217.774	311.92	374.544	298.447	263.104	367.917	299.966	217.076	304.37	346.525	228.069	216.282	260.749	122.107	263.069	293.315	207.183	250.203	329.736	301.647	301.656	197.328	238.263	138.577	265.392	305.361	219.148	266.418	338.015	284.069	151.786	228.196	141.974	131.029	235.107	274.57	273.886	194.87	95.4015	163.095	355.781	208.201	77.501	189.475	243.471	210.279
1007	411.256	152.101	250.1	216.921	311.885	378.274	298.194	262.377	368.798	303.06	224.546	303.998	350.714	227.085	215.762	260.192	121.34	262.283	292.895	206.422	253.402	327.296	301.566	297.809	196.808	238.774	137.929	265.495	307.822	218.103	266.674	342.185	285.219	152.192	231.437	141.714	130.731	235.07	275.711	274.377	194.104	94.5108	163.091	354.296	208.451	77.5418	189.895	244.506	208.392
1008	412.329	153.168	250.583	215.427	311.638	378.268	297.748	261.701	369.039	304.553	228.813	303.48	352.768	226.586	218.976	259.634	120.623	261.022	292.154	205.769	250.734	324.809	304.686	293.671	198.955	243.555	137.213	265.479	309.963	217.236	266.519	343.157	286.284	152.643	234.426	141.471	130.418	234.821	276.412	274.998	193.175	93.6146	163.069	352.728	208.632	77.747	190.309	245.509	206.473
1009	411.8	155.307	250.531	213.507	310.856	380.929	296.94	261.08	369.6	310.317	227.745	302.856	351.617	226.087	217.389	258.011	119.969	259.643	291.734	205.507	248.596	322.263	305.671	289.533	198.435	242.464	136.458	265.168	310.93	216.761	266.199	345.192	286.591	153.134	237.178	141.237	130.114	234.713	277.113	275.765	192.362	92.6677	163.039	351.079	208.758	77.7881	190.761	246.89	204.585
[truncated: 6,101 more rows]
[truncated: 21 more columns]
